## **Title page**

# **Integrated multiomic analysis from chromatin to translation of stimulus-regulated gene activity exposes dominant patterns of nuclear-level control**

## **Running Head: Dynamics in Nuclear Gene Regulatory Control by Hypoxia**

Travis A Lee<sup>1,2</sup> and Julia Bailey-Serres<sup>1</sup>

<sup>1</sup>Center for Plant Cell Biology and Botany and Plant Sciences Department, University of California, Riverside, California 92521, USA

<sup>2</sup>Plant Biology Laboratory, The Salk Institute for Biological Studies, La Jolla, CA 92037, USA

ORCID ID: 0000-0002-8352-8956 (T.A.L.)

ORCID ID: 0000-0002-8568-7125 (J.B.-S.)

Corresponding author: Julia Bailey-Serres

## 1 **Background**

2 Limitations in molecular oxygen reduce ATP production and dramatically curtail energy  
3 demanding processes in eukaryotes. Little is known of the influence of hypoxia on nuclear  
4 regulatory mechanisms and their integration with mRNA accumulation and translation. Here we  
5 apply multomic technologies to evaluate epigenetic to translational regulation in response to  
6 hypoxic stress in seedlings of *Arabidopsis*. We focus on hypoxia-responsive (*HRG*) and  
7 *RIBOSOMAL PROTEIN (RP)* genes that encode actively and poorly translated mRNAs under  
8 hypoxia, respectively.

## 10 **Results**

11 Evaluation of hypoxia-induced dynamics in eight chromatin readouts including chromatin  
12 accessibility, histone modifications, RNA polymerase II (RNAPII) activity plus three RNA  
13 populations (nuclear, polyadenylated, and ribosome-associated) identified distinct patterns of  
14 nuclear regulation. *HRGs* coordinately increased promoter accessibility, Histone 2A.Z eviction,  
15 Histone 3-lysine 9 acetylation, and RNAPII engagement. Many *HRG* promoters were bound by  
16 HYPOXIA-RESPONSIVE ETHYLENE RESPONSIVE FACTOR (ERF) 2 (HRE2) or had *cis*-  
17 elements targeted by related ERFs. Hypoxia sustained *RP* transcription but the transcripts were  
18 largely retained in the nucleus. We discovered heat and oxidative stress genes with pronounced  
19 hypoxia-induced RNAPII engagement accompanied by elevated nuclear and ribosome-  
20 associated but not polyadenylated transcripts. These heat stress genes had *cis*-elements  
21 recognized by HEAT SHOCK FACTOR transcriptional activators, 5' biased histone marks, less  
22 H2A.Z eviction and Histone 3-lysine 4 trimethylation than genes bound by HRE2 and  
23 coordinately upregulated from transcription through translation. Genes of the circadian cycle,  
24 photosynthesis, and development also displayed notable nuclear regulation.

## 26 **Conclusions**

27 Hypoxia triggers dominant patterns in nuclear regulatory control that differentiate cohorts of  
28 genes associated with stress responses and growth.

30 **Keywords:** *Arabidopsis thaliana*, hypoxia, histone modification, H2A.Z, ATAC-seq, RNA  
31 Polymerase II, nascent RNA, polyadenylated RNA, transcriptome, TRAP-seq

## 32 Background

33 The regulated expression of protein coding genes in eukaryotes involves processes within the  
34 nucleus including the remodeling of chromatin, recruitment of RNA polymerase II, co-  
35 transcriptional processing and the export of mature mRNA to the cytoplasm, after which it may  
36 be translated, sequestered or degraded. These processes are modulated in response to  
37 conditions that necessitate alterations in metabolism and management of energy reserves to  
38 maintain cell viability including oxygen deficiency. In *Arabidopsis thaliana*, cellular hypoxia  
39 promotes activation of anaerobic metabolism to sustain cell viability. This involves rapid  
40 activation in transcription followed by selective translation of a subset of cellular mRNAs, while  
41 others are transiently sequestered and stabilized whereas others are degraded [1–4]. The  
42 mRNAs that are well translated under hypoxic stress are not characterized by a sequence  
43 element or feature [1,3,4] but are likely to be transcriptionally upregulated by the stress.

44 Transcriptional activation in response to hypoxia involves the evolutionarily conserved  
45 group VII ethylene response factor (ERFVII) transcription factors (TFs) that are required for  
46 regulation of metabolism and survival of hypoxia [5–13]. The five members of this family are  
47 stabilized under hypoxia, due to attenuation of their oxygen-stimulated targeted proteolysis via  
48 the N-end rule pathway [7,8,12,14]. The constitutively synthesized ERFVIIIs RELATED TO  
49 APETALA 2.2, 2.3, and 2.12 (RAP2.2, RAP2.3, RAP2.12) transactivate hypoxia-responsive  
50 gene (*HRG*) promoters in protoplasts [13,15,16] through a conserved *cis*-acting hypoxia-  
51 responsive promoter element (HRPE) identifiable in ~50% of the 49 *HRGs* expressed across  
52 cell types [7,15,17]. The two additional ERFVIIIs, HYPOXIA-RESPONSIVE ERF 1/2 (*HRE1/2*)  
53 only weakly transactivate via the HRPE in protoplasts [15,18], suggesting they interact with a  
54 distinct *cis*-element or may otherwise influence gene transcription. Both *HRE1/2* are  
55 upregulated by hypoxia along with *ALCOHOL DEHYDROGENASE 1 (ADH1)* and *PLANT*  
56 *CYSTEINE OXIDASE 1/2 (PCO1/2)* that are required for anaerobic metabolism and negatively  
57 regulate the anaerobic response by catalyzing the oxygen-stimulated turnover of ERFVIIIs,  
58 respectively [14,16,19,20].

59 Transcriptional activation requires access of TFs to specific *cis*-regulatory elements that  
60 are typically located near the 5' transcription start site (TSS) of genes and facilitate assembly of  
61 an RNAPII initiation complex. The distribution of nucleosomes across a genome can be  
62 assessed by DNase I hypersensitivity site mapping [21,22] or the Assay for Transposase-  
63 Accessible Chromatin using sequencing (ATAC-seq) [21]. ATAC-seq leverages a Tn5  
64 transposon that simultaneously inserts adaptor sequences and cleaves DNA in nucleosome-  
65 depleted chromatin regions [23]. The depletion of nucleosomes relative to the 5' TSS of each  
66 gene is controlled by a cadre of ATP dependent chromatin remodelers and can be influenced by  
67 interactions with certain TFs. The spatial distribution of nucleosomes with specific histones in  
68 their octamer core is routinely determined by chromatin immunopurification and sequencing  
69 (ChIP-seq). TF binding and RNAPII activity are influenced by and influence histone  
70 modifications and variants [24,25]. Tri-methylated Histone 3-lysine 27 (H3K27me3) and  
71 H3K4me3 are prevalent in the gene body of lowly and actively transcribed genes, respectively  
72 [25,26]. Acetylation of Histone H3 lysine residues (H3K9ac, H3K14ac) that reduce interactions  
73 between DNA and histones are associated with ongoing transcription [25]; these marks are also  
74 correlated with the active transcription of genes during environmental stress in plants [27–29].  
75 Constitutive high levels of the Histone 2A variant H2A.Z are associated with stress-activated

76 transcription and its presence at the first nucleosome within the gene body may reduce the  
77 energy required for commencement of transcriptional elongation on genes activated by elevated  
78 temperatures [30–34]. To date, there has been no genome-scale evaluation of coordinated  
79 dynamics in chromatin accessibility, histone alterations, transcription, and translation in a plant  
80 or other eukaryotes.

81 As transcription commences, the phosphorylation of specific residues within the heptad  
82 repeats of the carboxyl terminal domain (CTD) of RNAPII orchestrate interactions with factors  
83 that facilitate transcription-coupled histone modifications as well as co-transcriptional 5' capping,  
84 splicing, and polyadenylation of the nascent transcript [35,36]. RNAPII CTD phosphorylation at  
85 Serine 2 (Ser2P) demarks active elongation [37]. In animals, pausing of RNAPII downstream of  
86 the TSS is common among genes activated by heat stress [38]. Global nuclear run-on  
87 sequencing (GRO-seq) on *Arabidopsis* seedlings under optimal growth conditions found limited  
88 evidence of promoter-proximal pausing of RNAPII [39] but the mapping of the 5' end of nascent  
89 transcripts by Native Elongating Transcript sequencing (NET-seq) [40] indicated that elongation  
90 can be rate-limiting shortly after initiation. Both studies found transcription is rate-limited as  
91 RNAPII pauses just beyond the site of cleavage and polyadenylation. Nuclear splicing,  
92 polyadenylation and export to the cytoplasm is regulated during development and in response to  
93 environmental cues, and hypoxia promotes alternative splicing [2,3,17,41], alternative  
94 polyadenylation [42], and nuclear retention of transcripts [43] in plants. We hypothesized that  
95 the strong hypoxia-induced upregulation of *HRGs* and their prioritization for translation may be  
96 associated with specific features of their chromatin or transcriptional activation.

97 Here, we monitored dynamics in histones, chromatin accessibility, HRE2 binding and  
98 RNAPII-Ser2P distribution along gene bodies in response to hypoxic stress in seedlings. These  
99 nuclear readouts were compared with dynamics in nuclear RNA (nRNA), polyadenylated RNA  
100 (polyA RNA) and ribosome-associated RNA. An integrative analysis exposed distinct patterns of  
101 chromatin signatures, *cis*-element enrichment, and temporal regulation of nRNA accompanied  
102 by modulation of polyA or translated transcripts. This multiomic analysis provides a rich  
103 resource for evaluation of gene activity from epigenetic state and RNAPII activity through  
104 translation in a model organism.

105

## 106 **Results**

### 107 **A multiscale dataset for analysis of dynamics from chromatin to translation**

108 To better understand dynamics in gene regulatory variation following hypoxic stress, we  
109 developed chromatin and RNA-based genome-scale datasets in triplicate for seedlings treated  
110 with non-lethal hypoxic stress (2 h, 2HS; 9 h, 9HS) or normoxia (2NS, 9NS) consistent with prior  
111 high-throughput analysis of cell-type specific and translational regulation [2,3,17] (Fig. 1a;  
112 Figure S1a). The position and abundance of H3K9ac, H3K14ac, H3K4me3, H3K27me3, and  
113 H2A.Z was surveyed by ChIP-seq. The capture of nuclei by Isolation of Nuclei Tagged in  
114 Specific Cell Types (INTACT) was coupled with mapping of chromatin accessible regions by  
115 ATAC-seq [44,45] and ChIP-seq to monitor binding of the TF HRE2 and elongating RNAPII-  
116 Ser2P. Three transcript populations were compared including nRNA obtained by INTACT (rRNA  
117 subtracted nascent transcriptome [46]), polyA RNA obtained by oligo dT affinity purification  
118 (transcriptome) and polyA RNA associated with ribosomes obtained by Translating Ribosome  
119 Affinity Purification (TRAP RNA; translato) [3,47]. The sequence reads mapped across

120 annotated gene transcripts for each library type and treatment was reproducible but  
121 distinguishable by t-Distributed Stochastic Neighbor Embedding analysis (Fig. 1b) and the  
122 distribution of read abundance (Fig. 1c; Figure S1b-c). Because the ATAC-seq reads mapped  
123 primarily to non-transcribed regions (Fig 1g) these data were assayed separately. These assays  
124 of gene activity were used collectively to explore the integration of nuclear and cytoplasmic  
125 gene regulatory processes following hypoxic stress.

### 127 **Stress- and growth-associated genes contrast in chromatin accessibility, histone,** 128 **modifications and RNA modulation under hypoxia**

129 For the nucleosome level evaluation, H3K9ac, H3K14ac, H3K4me3, H2A.Z, and H3K27me3  
130 were plotted along each annotated protein-coding gene and global averages were compared for  
131 each condition (Fig. 1d; Figure S2a). H3 modifications associated with transcription (H3K9ac,  
132 H3K14ac, H3K4me3) and stress-activated transcription (H2A.Z) were enriched just 3' of TSS  
133 and tapered off at the primary site of polyadenylation (TES), whereas H3K27me3 was  
134 distributed more evenly across gene bodies. Hypoxia had little effect on these modifications at  
135 the global level, with the exception of a slight elevation of H3K14ac and reduction of H3K4me3  
136 near the TSS. Meaningful alterations were apparent when histone abundance and distribution  
137 was surveyed for two gene cohorts with opposing transcript accumulation and translation under  
138 hypoxia, the induced and translated *HRGs* (n=49) and stable but poorly translated cytosolic *RPs*  
139 (n=246). *HRGs* significantly increased in H3K9ac and decreased in H2A.Z association at 2HS,  
140 with limited change in these marks on *RPs* (Fig. 1e, f; Figure S3a-c). We extended the stress to  
141 9 h (9HS) to evaluate H3K9ac and the more slowly changing H3K14ac associated with active  
142 transcription. At the global scale, hypoxia increased H3K9ac on 863 and 3,646 genes and  
143 H3K14ac on 2 and 1,216 genes and after brief and prolonged hypoxia, respectively (Figure S1b;  
144 Table S2). Notably, H3K14ac but not H3K9ac levels progressively increased on *RPs* (Fig. 1f;  
145 Figure S1c; Figure S3a,c).

146 Next, we evaluated dynamics in chromatin accessibility in genic regions by use of ATAC-  
147 seq. Accessibility in 5' promoter regions is associated with depletion of nucleosomes and  
148 binding of TFs and other transcriptional machinery [45,48,49], whereas accessibility in 3'  
149 flanking regions is associated with formation of chromatin loops and transcriptional termination  
150 [50,51]. Our ATAC-seq reads mapped almost exclusively within 1000 bp 5' of the TSS and ~300  
151 bp 3' of the major TES of genes in all four conditions (Fig. 2c). At 2HS the summative ATAC-seq  
152 peak height was higher than at 2NS, with the opposite trend observed for 9NS and 9HS (Fig.  
153 2a). With respect to the opposingly regulated *HRGs* and *RPs*, the average ATAC signal within  
154 promoters rose by 1.8- and 1.4-fold by 2HS, respectively (Fig. 2b). Chromatin remodeling by the  
155 stress was evident from the expansion into more 5' and 3' flanking regions of the *HRGs* at both  
156 2HS and 9HS. We also performed peak-calling to recognize Tn5 hypersensitive insertion sites  
157 (THSs) in order to quantify localized dynamics in chromatin accessibility, identifying both  
158 constitutively present (8,072) and stress-specific THSs (25,795) (Fig. 2c-f; Table S1a).

159 To complete our integrative survey of gene activity, we compared the distribution of the  
160 log<sub>2</sub> fold change (FC) (2HS/2NS) values of the chromatin, RNAPII and RNA readouts genome-  
161 wide and for the *HRGs* and *RPs* (Fig. 3a; Table S2a). We found that stress-induced RNAPII-  
162 Ser2P engagement was positively correlated with increased H3K9ac and negatively correlated  
163 with H2A.Z eviction as demonstrated by the *HRGs* (global R = -0.27, *HRGs* R = -0.79) (global R

164 = 0.43; *HRGs* R = 0.17; Fig. 3 b,c; Figure S4). *RPs* displayed minor changes in RNAPII-Ser2P  
165 association at 2HS, yet H3K14ac and nRNA abundance was elevated at the majority of these  
166 genes by 9HS (Fig. 3a; Figure S3c; Table S2a). These results demonstrate patterns of stress-  
167 induced epigenetic regulation distinct to stress-induced and growth-associated genes.

168

### 169 **Regulation at nuclear and cytoplasmic scales can be concordant or discordant**

170 To explore possible coordination of transcriptional and posttranscriptional gene regulation in  
171 response to hypoxia we performed a systematic analyses of the Ser2P, nRNA, polyA and TRAP  
172 RNA datasets. First, we surveyed whether significantly up- and downregulated genes (DRGs)  
173 in one readout were similarly regulated in other readouts. Second, we performed gene  
174 clustering to group genes that were co-regulated based on one or more readout.

175 A four-way comparison of DRGs identified nRNA with the greatest (1,722) and polyA  
176 RNA the fewest (602) up-DRGs (Fig. 4a). The vast majority (92%) of the polyA up-DRGs were  
177 upregulated in at least one other readout, whereas only 213 (13%) were significantly elevated in  
178 all four readouts. Notably, the coordinately upregulated genes included 38 of the 49 *HRGs*. A  
179 parallel analysis found 72% of the polyA down-DRGs were significantly reduced in at least one  
180 other dataset, with nRNA again displaying the greatest number of DRGs (down-DRGs: Ser2P  
181 [206], nRNA [2,608], polyA [291], TRAP [578]) (Fig. 4b). The lack of consensus in nRNA and  
182 polyA transcript dynamics suggests these RNA populations of are not equivalent. Indeed, a  
183 pairwise comparison of nRNA and polyA RNA abundance in the 2NS and 2HS samples  
184 identified transcripts enriched in the nRNA (nucleus-localized transcripts) and polyA RNA  
185 fractions (Figure S5a,b; Table S3).

186 Patterns of differential gene regulation were resolved further by identifying genes that  
187 were co-regulated in response to 2HS. Log<sub>2</sub> fold change (FC) values for all DRGs identified in at  
188 least one of the four datasets were sorted into 16 groups by partition around medoids (PAM)  
189 clustering and evaluated by Gene Ontology (GO) term enrichment (Fig 4c; Table S4a). This  
190 identified four clusters of coordinately upregulated (clusters 1-4) and one cluster of coordinately  
191 downregulated (cluster 16) genes. Other clusters differed in dynamics in one or more of the  
192 readouts. These analyses confirm that hypoxia impacts gene regulatory processes in both the  
193 nucleus and cytoplasm. This finding motivated us to consider whether changes in histones were  
194 characteristic of the patterns observed in RNAPII-Ser2P and RNA accumulation.

195

### 196 **Patterns of histone alteration are associated with concordant and discordant regulation**

197 To explore associations between regulatory variation at the chromatin, RNAPII and RNA scales,  
198 the average signal value for each data type of each cluster was plotted along genic regions (Fig.  
199 4d; Figure S6). To appreciate the dynamic regulation of these genes over time, the same  
200 clusters were plotted using the 9NS and 9HS chromatin and RNA data (Fig. S7). We found the  
201 coordinate (concordant) upregulation of cluster 1-3 gene transcripts at 2HS was accompanied  
202 by enhanced chromatin accessibility, eviction of H2A.Z, as well as elevation of H3K9ac and  
203 RNAPII-Ser2P across the gene body. The coordinate rise in TRAP RNA level indicated these  
204 transcripts were translated in proportion to their increased abundance, as determined previously  
205 for the *HRGs* by high-resolution ribosome footprinting analyses [3]. Nearly all *HRGs* were  
206 present in the first two clusters, which were enriched for the the GO categories decreased  
207 oxygen level (cluster 1, p-adj. <6.73e<sup>-22</sup>) and general stress (cluster 2, <1.06e<sup>-21</sup>) (Table S4a).

208 Genome browser views of two representative *HRGs*, *ADH1* and *PCO2*, illustrate the coordinate  
209 upregulation across the assays of gene activity (Fig. 5a,b).

210 Cluster 4-8 genes were not coordinately upregulated, indicating they are targets of post-  
211 transcriptional regulation. The rise in cluster 4 nRNA coincided with elevation of H3K9ac and  
212 RNAPII-Ser2P that is indicative of increased transcription, yet this was not accompanied by a  
213 similar rise in polyA or TRAP RNA (Fig. 4c; Figure S6). This discordant pattern could reflect  
214 nuclear retention or cytoplasmic destabilization of these transcripts. Clusters 6 and 7 genes  
215 were elevated primarily in nRNA at 2HS, a pattern that could reflect nuclear retention of  
216 previously synthesized transcripts in response to the stress. Yet another pattern was observed  
217 for Cluster 8, which was enriched for genes encoding *RP*s ( $<8.06e^{-16}$ ). As noted for the *RP*  
218 cohort (Fig 3a,b; Figure S1b), these genes had limited change in H3K9ac but a rise in H3K14ac  
219 and nRNA at 2HS and 9HS (Figures S6 and S7), as illustrated by *RPL37B* (Fig. 3a; Fig. 5d;  
220 Figure S1b).

221 One of the most intriguing clusters was 9, which was notably distinct for the hypoxia-  
222 induced engagement of RNAPII-Ser2P without a similar rise in nRNA or polyA RNA. By  
223 comparison to cluster 1, cluster 9 had lower and more 5' skewed H2A.Z at 2NS that was only  
224 slightly reduced at 2HS (Fig 4d; Figure S9a). In addition, H3K4me3 association was significantly  
225 lower for cluster 9 than cluster 1 at 2HS (Figure S9c,d). The status of cluster 9 gene regulation  
226 changed between 2HS and 9HS, at which time their promoter region accessibility was elevated,  
227 along with H3K9ac, H3K14ac, nRNA and polyA RNA (Figure S7). Both cluster 2 and 9 genes  
228 were enriched for heat (cluster 2,  $<7.74e^{-14}$ ; cluster 9,  $<6.20e^{-13}$ ) and oxidative stress (cluster 2,  
229  $<1.13e^{-12}$ ; cluster 9,  $<8.23e^{-11}$ ). The cluster 2 gene *HEAT SHOCK PROTEIN 70-4 (HSP70-4)*, as  
230 an example, displayed a 3.4-fold increase in RNAPII-Ser2P across the genic region with a very  
231 limited increase in polyA RNA at 2HS but a pronounced increase by 9HS (Fig. 5c). Notably,  
232 TRAP mRNA levels were higher than polyA RNA for *HSP70-4* at 2HS, as observed for *ADH1*  
233 and *PCO2*.

234

### 235 **Highly downregulated genes have distinct stimulus-regulated histone modifications**

236 Survey of the down-DRG genes (clusters 10-16) also showed stimulus-driven dynamics of  
237 chromatin, RNAPII and RNAs (Fig. 4a; Figure S6). These clusters displayed two dominant  
238 patterns. Cluster 10-14 were distinguished by significant reductions in nRNA at 2HS to 9HS that  
239 were accompanied by progressive increases in H3K14ac but limited changes in H2A.Z and  
240 H3K9ac. By 9HS, levels of H3K14ac had clearly increased in all but cluster 13, particularly near  
241 the TSS (Figure S6; Figure S7). Cluster 15 and 16 genes were strongly and coordinately  
242 reduced in RNAPII-Ser2P engagement and all three RNA readouts at 2HS (Fig. 4a; Figure S6).  
243 This was accompanied by slight elevation of H2A.Z incorporation and a strong decline in  
244 H3K9ac, all antithetical to the changes observed for cluster 1-3 (Figure S9a,c). These genes  
245 also had limited change in chromatin accessibility. Of the down-DRGs, only clusters 15 and 16  
246 were strongly enriched for GO categories, including root development (cluster 15,  $<3.7e^{-8}$ ) and  
247 regulation of transcription and RNA biosynthesis (cluster 16,  $<7.78e^{-7}$ ). The reduced  
248 transcription and translation of these genes would contribute to energy conservation during  
249 hypoxia, as reported for the *RPs* [2]. Despite their opposing regulation, we noted that the most  
250 highly up- (cluster 1-2) and down-DRGs (cluster 15-16) were characterized by H3 modifications  
251 (H3K4me3, H3K9ac, H3K14ac) broadly distributed along the gene body, as opposed a more 5'

252 biased distribution of H3 and H2A.Z in the other clusters. This indicates that H2A.Z distributed  
253 across a gene body limits chromatin accessibility and engagement of RNAPII under non-stress  
254 conditions.

255

### 256 **H3K14 acetylation accompanied by limited H3K9 acetylation is characteristic of** 257 **synthesized but nuclear-retained transcripts**

258 To assess the impact of prolonged sub-lethal hypoxic stress we monitored the progressive  
259 change in H3K9ac, H3K14ac, nRNA, and polyA RNA at 2HS and 9HS by evaluation of log<sub>2</sub> FC  
260 distribution again using multiple methods to visualize these genome-scale data (Fig. 6a,b;  
261 Figure S8; Table S2a). H3K9ac and H3K14ac levels were progressively and distinctly altered for  
262 the *HRG* and *RP* cohorts (Fig. 6a). We observed a coordinated rise in H3K9ac, nRNA and  
263 polyA RNA at 2HS and 9HS for clusters 1b-2b, identifying over 360 genes (38 *HRGs*) that were  
264 progressively upregulated. By contrast, we resolved patterns of discordant up- and  
265 downregulation between clusters 4b-11b, confirming that regulation of these changed as  
266 hypoxia was prolonged. Many genes with elevated nRNA at 9HS were enriched for H3K14ac  
267 near their TSS (clusters 2b-8b) (Figure S8), as exemplified by the *RPs* (Fig. 1f). Of the 228  
268 cytosolic *RPs* monitored, 149 significantly increased in nRNA abundance at 9HS. Their  
269 progressive increase in nRNA demonstrates that genes scored as unchanged or downregulated  
270 by polyA transcriptomics may be actively transcribed during the stress but retained in the  
271 nucleus as near-full length (non-polyadenylated) nascent or mature transcripts. Other genes  
272 were more up- (cluster 6b) or downregulated after 9HS (clusters 8b-11b). Pronounced  
273 downregulation at 9HS included the GO categories photosynthesis (cluster 8b,  $<5.8e^{-7}$  and  
274  $<1.5e^{-6}$ ), root development (cluster 10b,  $<1.7e^{-6}$ ) and transcription (cluster 11b,  $<7.6e^{-6}$ ) (Table  
275 S4b). A key finding was that regulation of transcript abundance may be distinct within the  
276 nucleus and the cytoplasm, where the vast majority of polyA RNA is located and undergoes  
277 translation, sequestration, or degradation.

278 Notably, genes associated with phasing of the circadian clock were perturbed by  
279 prolonged hypoxic stress. This included maintenance of mRNAs with peak abundance towards  
280 the end of the light cycle (cluster 6b; evening genes, circadian rhythm  $<7.9e^{-10}$ ) and reduced  
281 upregulation of morning gene transcripts. For example, *TIMING OF CAB EXPRESSION (TOC1)*  
282 and other evening gene polyA RNAs remained elevated after 9HS (Fig. 6c,d). By contrast,  
283 transcripts of the key morning expressed clock regulators *CIRCADIAN CLOCK ASSOCIATED 1*  
284 (*CCA1*) (cluster 16b) and *LATE ELONGATED HYPOCOTYL (LHY)* (cluster 15b) as well as the  
285 midday *PSEUDO RESPONSE REGULATOR 7/9 (PRR7/9)* were dampened in nRNA and/or  
286 polyA RNA at 9HS. Thus, hypoxia imposed in at the end of the day extremely delays or arrests  
287 the phasing of the circadian cycle. Low energy stress is known to extend the circadian cycle via  
288 SnRK1-mediated enhancement of *PPR7* transcriptional activation just prior to dawn [52]. This  
289 mechanism, however, does not seem to be relevant when hypoxia is initiated at the end of the  
290 light cycle and continued overnight, as *PPR7* nRNA and polyA RNA was significantly lower at  
291 9HS relative to 9NS. This difference between the effect of hypoxia and conditions that invoke an  
292 energy stress could be our imposition of hypoxia at the end of the light cycle or inclusion of  
293 sucrose in the medium.

294

### 295 **Many coordinately hypoxia-upregulated genes are targets of ERFVII regulation**



296 We hypothesized that the 215 coordinately up-DRGs might be transcriptionally activated by the  
297 low-oxygen stabilized ERFVIs. We therefore searched for the presence of the HRPE in genes  
298 of each cluster resolved in the 2HS analysis (Fig. 4c) and found it was significantly enriched in  
299 cluster 1 promoters (Fig. 7a; Table S5), including the genes with the strongest and most  
300 coordinate upregulation. The constitutively expressed ERFVIs (RAP2.2, RAP2.3 and RAP2.12)  
301 activate transcription via the HRPE in transfected protoplasts assays and based on targeted  
302 ChIP-qPCR [15,16], whereas the hypoxia-induced ERFs HRE1 and HRE2 do not. Of these,  
303 HRE2 is encoded by an *HRG* and is stabilized in seedlings after 2HS [7]. To gain more insight  
304 into the role of HRE2, ChIP-seq was performed on 2HS seedlings overexpressing a stabilized  
305 version of this ERFVII. Over 75% of the reads mapped within 1 kb upstream of TSSs, with clear  
306 enrichment of binding within 500 bp of the TSS (Figure S10; Table S2a). Binding of HRE2 to  
307 promoter regions was significant for clusters 1-3 (Fig. 7b). An unsupervised search for motifs  
308 enriched in HRE2 peak regions discovered an overrepresented multimeric 5'-GCC-3' element  
309 ( $p$ -value  $< 1e^{-351}$ ) (Fig. 7c; Table S5). This motif did not correspond to the HRPE, rather it  
310 resembled the GCC-rich EBP box bound by ERFs including ERFVII RAPs. Indeed, RAP2.12  
311 bound a nearly identical motif based on the *in vitro* DNA affinity purification and sequencing  
312 (DAP-seq) assay [53] and stabilized RAP2.3 associated *in vivo* with promoter regions with this  
313 element based on ChIP-qPCR [54] and bound *in vitro* to DNA oligos with this sequence in  
314 electrophoretic mobility shift assays [55]. Although the HRE2 motif was enriched in cluster 1, it  
315 was more prevalent than the HRPE in other clusters (Fig. 7c), leading us to consider HRE2  
316 binding to a promoter and HRPE presence over the HRE2 motif presence as relevant to  
317 hypoxia. The binding of HRE2 to the promoter was observed for 60 of the 49 coordinately  
318 upregulated genes, of which 23 contained an HRPE (Fig. 7e; Table S2a). Overall, 50% of the  
319 215 coordinately up-DRGs were bound by HRE2 in their promoter region or are likely RAP-  
320 ERFVII targets based on the presence of an HRPE in their promoters (Fig. 7e). These results  
321 support the conclusion that many of the coordinately up-DRGs are transcriptionally activated by  
322 one or more ERFVII.

323

### 324 **Hypoxic-stress progressively activates genes in heat and oxidative stress networks**

325 The regulatory variation of oxidative stress and heat response genes displayed at 2HS in  
326 clusters 2-3 and 9 was of interest as genes in these categories are upregulated by rapid onset  
327 anoxia or prolonged hypoxia [2,3,17,41,56]. Both the onset of hypoxia and reoxygenation trigger  
328 a reactive oxygen species (ROS) burst that contributes to signaling [57]. The upregulation of  
329 *RESPIRATORY BURST OXIDASE (RBOH)* genes including *RBOHD* contributes to survival of  
330 hypoxia, submergence and post-submergence recovery [58–61]. The relationship between  
331 hypoxia and heat stress is not clearly understood but a brief heat shock protects *Arabidopsis*  
332 seedlings from anoxia via cooperative action of the HEAT SHOCK FACTOR (HSF)  
333 transcriptional activators HSFA1A/B and HSFA2 [56,62]. Elevation of RNAPII-Ser2P without a  
334 commensurate increase in polyA RNA was characteristic of *HSPs*, *RBOHs* and transcriptional  
335 co/activators associated with heat and oxidative stress (i.e., *MULTIPROTEIN BRIDGING*  
336 *FACTOR 1C (AtMBP1C)*, *DEHYDRATION-RESPONSIVE 2A (DREB2A)*, *ZINC FINGER*  
337 *PROTEIN 12 (ZAT12)*).

338 Because strong and coordinate upregulation of genes in response to hypoxia was  
339 associated with activation by ERF-VIIs, we considered that the more gradual activation of

340 cluster 9 genes may be mediated by members of HSF transcriptional activators. This led to the  
341 discovery that clusters 2 and 3 included several *HSFs* that were elevated in TRAP RNA at 2HS  
342 (*HSFA2*, *HSFA4A*, and *HSFA7A*) and HSF *cis*-elements (HSEs) were significantly enriched in  
343 promoters of cluster 2, 3 and 9 genes (Fig. 7d). The pronounced increase in RNAPII-Ser2P  
344 engagement on these genes at 2HS corresponded with a rise in nRNA but limited elevation of  
345 polyA RNA at either 2HS and 9HS (Figure S11). These genes were distinguishable from the  
346 HRE2-bound up-DRGs by a (1) 5' bias in nucleosomes across gene bodies, (2) more 5'  
347 localized H2A.Z that was less dramatically evicted by 2HS, (3) reduced H3K4me3, (4) increased  
348 H3K14ac that preceded the rise in H3K9ac, (5) and an increase in nRNA not necessarily  
349 mirrored in polyA RNA. Collectively, these results resolve patterns of nuclear gene regulatory  
350 control that distinguish stress-activated genes regulated by different transcriptional activators.

351

## 352 Discussion

### 353 Gene regulation in response to hypoxic stress involves regulation of chromatin, 354 transcription, and post-transcriptional processes in the nucleus and cytoplasm

355 This study assembled a dataset of genome-wide measurements of chromatin state and  
356 intermediary steps of gene expression in seedlings exposed to sub-lethal hypoxic stress and  
357 identified time-dependent chromatin and transcript dynamics, the latter not captured by standard  
358 transcriptomics. We found that hypoxic stress modulates the (1) position and degree of open  
359 chromatin near the TSS, (2) trimethylation and acetylation of H3 lysines, (3) eviction of H2A.Z,  
360 (4) engagement of RNAP II-Ser2P, and (5) the abundance of nuclear, polyadenylated and  
361 ribosome-associated gene transcripts. Here, we demonstrate that steady-state nuclear and  
362 polyA transcriptomes are distinct, as shown by a similar comparison for rice [46]. Our findings of  
363 translational regulation are also consistent previous reports [1,63,64]. The use of RNAPII-Ser2P  
364 association as a proxy for transcriptional elongation suggests that global levels of transcription  
365 were not dramatically dampened by 2HS (Fig. 1c), although there was considerable regulation  
366 of individual genes (Fig 1c; Fig. 4c). Remarkably, we discovered that less than 10% of all DRGs  
367 were coordinately up- or downregulated at 2HS from transcription (RNAPII-Ser2P) through  
368 translation. Four patterns of discontinuous gene regulation were apparent: (1) partial  
369 upregulation, characterized by high RNAPII-Ser2P engagement and delayed elevation of polyA  
370 RNA, as observed for many heat and oxidative stress genes, (2) compartmentalized  
371 downregulation, characterized by maintained RNAPII-Ser2P engagement and increased nRNA  
372 abundance with limited change in polyA RNA, as observed for *RPs*; and (3) enhanced or  
373 reduced translational status, measured by comparison of TRAP RNA and polyA RNA  
374 abundance as described previously [2,3,17]. We also identified variations in nuclear regulation  
375 (chromatin accessibility, histone modification, RNAPII engagement and nRNA abundance) that  
376 were a talisman of changes in polyA RNA abundance and translation.

377

### 378 Coordinate upregulation of hypoxia-responsive genes is characterized by nucleosome 379 dynamics associated with histone modification, histone variant eviction, and increased 380 chromatin accessibility

381 Hypoxia affected the position, composition, and modifications of specific histones of  
382 nucleosomes. The genes that were coordinately upregulated at the level of RNAPII-Ser2P  
383 engagement through ribosome association included the *HRGs* critical to low-oxygen stress

384 survival [7,13,15–17,65]. The strong and coordinate upregulation of *HRGs* was characterized by  
385 pronounced eviction of H2A.Z and enrichment of H3K9ac across the gene body as well as  
386 elevation of chromatin accessibility RNAP-Ser2P engagement, nRNA, polyA and ribosome-  
387 associated mRNAs (Fig. 8). The co-transcriptional histone acetyltransferase (HAT)-catalyzed  
388 placement of a positive charge on the N-terminus of H3K9 is considered a reliable signature of  
389 active transcription [27] and is common for stress-activated genes [28,29,66].

390 In animals, the H3K9ac modification is promoted by the presence of H3K4me3 and  
391 stimulates the recruitment of the super elongation complex for release of poised RNAPII  
392 complexes [38]. Although H3K4me3 generally rose on *HRGs* in response to 2HS, it was not as  
393 strongly correlated with RNAPII-Ser2P engagement as H3K9ac (Fig 3b; Figure S4d), raising the  
394 possibility that the co-upregulated genes may be activated by releasing polymerase pausing.  
395 This could relate to the stress-activated eviction of H2A.Z that is broadly distributed across  
396 these gene bodies at 2NS. The presence of H2A.Z in nucleosomes of gene bodies is associated  
397 with limited transcription [30,31] and its eviction is characteristic of temperature-responsive  
398 genes [30–34].

399 The mechanisms of H2A.Z deposition, eviction, and the impact on transcriptional  
400 regulation are complex and not fully understood. This process requires ACTIN-RELATED  
401 PROTEIN 6 (ARP6), a component of the SWR1 remodeling complex complex, and other factors  
402 in *Arabidopsis* [26,67]. Yet disruption of H2A.Z deposition in an *arp6* mutant has limited effect  
403 on regulation of *HRGs* under aerated growth conditions [34]. Other chromatin remodeling  
404 proteins or specific TFs could be important. In response to small increases in temperature;  
405 displacement of H2A.Z was facilitated by HSF1A in the activation of the heat response network  
406 [32]. H2A.Z eviction from *HRGs* could involve ERFVIIIs. Indeed, RAP2.2 reportedly interacts with  
407 the SWI-SNF remodeler BRAHMA leading to the hypothesis that it that may contribute to H2A.Z  
408 eviction or chromatin remodeling associated with increased chromatin accessibility [68]. Of the  
409 >200 coordinately up-DRGs, 69 had one or more HRPE within 1 kb of their TSS and many  
410 bound by HRE2 at 2HS (Fig. 7e; Table S2). RAP2.12 is stabilized and nuclear localized as  
411 external oxygen levels decline below 10 kPa [69]. The stabilization of RAP2.12 and other  
412 ERFVIIIs may coordinate RNAPII initiation and facilitate H2A.Z eviction to promote productive  
413 transcription that is coupled with H3K9 acetylation. If ERFVIIIs interact with the ATP-dependent  
414 chromatin remodeling machinery, they could also contribute to the stabilization or expansion of  
415 regions of accessible chromatin to facilitate high levels of transcriptional activation, resulting in  
416 transcripts that are efficiently processed, exported and translated under hypoxia. This  
417 continuum of effective upregulation from transcription to translation is reminiscent of the  
418 production of translationally competent mRNAs during nutrient starvation in yeast that is  
419 associated with specific transcription factors [70].

420

#### 421 **Genes associated with heat and oxidative stress are progressively activated by hypoxia**

422 The stress distinctly activated genes associated with heat and oxidative stress. The progressive  
423 upregulation of genes in cluster 9 (Fig. 4c; Figure S7) became more evident when their activity  
424 was compared at 2HS and 9HS with two chromatin and two RNA readouts (Fig. 7g). A  
425 significant proportion of these genes had HSEs within their promoters (Fig. 7d). Their pattern of  
426 regulatory variation included a 5' bias in histone marks and moderate to very high RNAPII-  
427 Ser2P engagement at 2HS accompanied by elevated nRNA and TRAP RNA, but little to no full-

428 length polyA RNA (Fig. 8). The increase in H3K9ac, H3K14ac and nRNA confirms these are  
429 progressively upregulated by hypoxia, whereas the pronounced 3' bias in polyA RNA suggests  
430 susceptibility to 5' to 3' degradation, as evident for *HSP70-4* (Fig. 5) and other members of  
431 cluster 9 (Figure S11).

432 Previously, heat stress-responsive genes were recognized as highly induced in  
433 *Arabidopsis* seedlings directly transferred to anoxia [56,62]. Remarkably, a brief pre-treatment  
434 with heat stress increased the resilience to anoxia of wild-type seedlings but not loss-of-function  
435 *hsfa2* or *hsf1a hsf1b* mutant seedlings [71]. This is enigmatic because high temperatures do not  
436 typically precede flooding in natural environments, but the availability of HSPs could reduce  
437 cellular damage under extreme stress conditions such as anoxia. Indeed, *HSPs* were plentiful in  
438 cluster 9. The limited synthesis of ATP-dependent chaperones during early hypoxia by nuclear  
439 sequestration/physical compartmentalization of their transcripts could minimize demands on  
440 limited energy reserves. However, as the stress is prolonged or upon reoxygenation, the  
441 synthesis of chaperones and proteins that provide protection from ROS could aid survival.

442 The nucleosome dynamics of cluster 2 and 9 genes included similar modifications with  
443 notable exceptions (Fig. 4c,d; Figures S7 and S11). Genes of both clusters underwent a loss of  
444 H2A.Z near the TSS of the gene body in conjunction with increased H3K9ac, but cluster 9  
445 showed a loss of H3K4me3 proximal to the TSS that was not evident for cluster 2 or other  
446 genes with strong coordinate upregulation. The decrease in H3K4me3 may be an indication of  
447 non-productive RNAPII-Ser2P engagement, as this modification is associated with RNAPII  
448 elongation [72,73]. We found a significant enrichment of HSEs in the promoters of both rapidly  
449 and progressively upregulated genes (Fig. 7d). The heat-mediated upregulation of *HSFA2*  
450 (cluster 2) but not *HSFB1* (cluster 9) is dependent on recruitment of ANTI-SILENCING  
451 FUNCTION 1 that was associated with RNAPII engagement [74]. We predict that recruitment of  
452 specific TFs and chromatin modifying enzymes may influence histone or RNAPII CTD  
453 modifications that have ramifications on the rate of RNAPII elongation, termination, or post-  
454 transcriptional processing, thereby tuning the timing and production of cohorts of stress induced  
455 transcripts. The progressive upregulation of heat and oxidative stress networks could be  
456 mediated by the upregulation of TF genes encoding HSFs (i.e., *HSFB2B*) and ZINC FINGER  
457 PROTEIN 10 (*ZAT10*), and others during the early hours of the stress. Our datasets provide an  
458 opportunity for further meta-analyses of heat and oxidative stress gene regulatory networks.

459

#### 460 **Transcription of genes associated with major cellular processes during hypoxia**

461 Intriguing patterns of transcriptional and RNA regulation of genes associated with cellular  
462 housekeeping became evident from our multi-tier evaluation (Fig. 8). Our prior comparisons of  
463 the transcriptome and translome determined that hypoxic stress limits the investment of  
464 energy into the production of abundant cellular machinery such as ribosomes. mRNAs encoding  
465 *RPs* and some other abundant proteins are maintained but poorly translated under hypoxic  
466 stress [1–4]. This stress-limited translation of *RPs* is associated with their sequestration in  
467 *UBP1C*-associated macromolecular complexes [4]. Upon reoxygenation, *RP* mRNAs became  
468 rapidly associated with polysomes [2–4]. Although nuclear run-on transcription assays  
469 demonstrated that transcription of housekeeping genes continues during hypoxia in roots of  
470 maize seedlings [75], it was not known if *RPs* or other *UBP1C*-sequestered mRNAs continue to  
471 be synthesized during hypoxia in *Arabidopsis* seedlings. Here, the profiling of RNAP-Ser2P and

472 nRNA confirmed that genes encoding RPs, metabolic enzymes and some photosynthetic  
473 apparatus are synthesized and retained as partially or completely processed transcripts in the  
474 nucleus during hypoxia (Fig. 6, e.g., cluster 8b), regulatory variation characterized by  
475 progressive increase in H3K14ac but not H3K9ac. The cause of the limited increase in polyA  
476 RNA is unknown but could be due to limited cleavage and polyadenylation. The uncoupling of  
477 the H3K9ac and H3K14ac marks associated with active transcription but limited polyA RNA  
478 accumulation was reported in pluripotent embryonic stem cells of mice on a cohort of promoters  
479 deemed inactive but primed for future activation [76]. We propose that many housekeeping  
480 genes continue to be transcribed and accumulate in the nucleus during the stress. This  
481 compartmentalized downregulation may poise cells for the observed rapid recovery of the  
482 transcriptome and translome upon reoxygenation [2,4].

483 Our genome-scale analysis support evidence of nuclear retention of transcripts that was  
484 visualized in response to hypoxic stress in *Arabidopsis* and lupine [43]. Moreover, mRNAs  
485 associated with the cell cycle are enriched in the nucleus under control conditions in  
486 *Arabidopsis* [77]. Our comparison of the nRNA and polyA RNA transcriptomes (Figure S5)  
487 validated the bias in nuclear enrichment of transcripts associated with the cell cycle (Figure S5),  
488 firmly indicating nuclear export is a point of regulation under control and stress conditions.  
489 During hypoxia, enhanced nuclear compartmentalization of the abundant transcripts associated  
490 with ribosome biogenesis, primary metabolism and photosynthesis would contribute to energy  
491 conservation by limiting translation, similar to the cytoplasmic sequestration associated with  
492 UBP1C. Nuclear retention and cytoplasmic sequestration could provide two reservoirs of  
493 transcripts that can be deployed upon reaeration, enabling rapid restoration of cellular  
494 processes. The RNA helicase eIF4AIII [78] as well as the RNA binding proteins UBP1A/B/C and  
495 the HRG-encoded CML38 form macromolecular ribonucleoprotein complexes that are primarily  
496 cytoplasmic but also present within the nucleus in response to hypoxia [4,79]. These complexes  
497 could orchestrate the nuclear co- and post-transcriptional processes during the stress. Hypoxia  
498 promotes alternative splicing including intron retention [3] and alternative polyadenylation site  
499 selection [42] and some of these transcripts are found in association with ribosomes.  
500 Nonetheless, there is no clear evidence of a general disruption of splicing or polyadenylation by  
501 hypoxia [3,42,78]. Further experimentation is required to understand the mechanisms  
502 responsible for the distinctive elevation in H3K14ac and nuclear-retained transcripts observed  
503 for many genes under hypoxic stress.

504

### 505 **An ERFVII hierarchy drives transcriptional activation in response to hypoxia**

506 This study included the first genome-wide analysis of the *cis*-element targets of an ERFVII.  
507 Enigmatically, CHIP-seq of the hypoxia-induced ERFVII HRE2 led to the identity of a multimeric  
508 GCC *cis*-element that did not correspond to the HRPE found in many HRGs and sufficient for  
509 transactivation by RAP ERFVIIs in protoplasts [15]. The HRE2 binding motif strongly resembled  
510 the double GCC motif of the EBP box first defined for an ERF of *Nicotiana tabacum* [80].  
511 Strikingly, RAP2.3 was shown to bind the *ACID INSENSITIVE 5 (ABI5)* promoter in the region of  
512 its two EBP boxes and transactivation of the *ABI5* promoter was demonstrated in protoplasts by  
513 all three constitutively expressed ERFVIIs (RAP2.2/2.3/2.12) in an EBP box-dependent manner  
514 [54]. It remains to be determined if HRE2 binds directly to the HRPE *in planta*, as neither HRE1  
515 or HRE2 interacted with a 33 bp region containing the HRPE in a Yeast-1 hybrid assay, and

516 both provided 40-fold lower transactivation via the HRPE in protoplasts than the RAP-ERFs  
517 [15]. This supports the conclusion that these these two subgroups of ERFVIs are not  
518 genetically redundant. Yet the predicted HRPE contains 5'-GCC-3' followed by a lower  
519 frequency 5'-GCC-3' and perhaps more significantly, the 33 bp sequence used to define the  
520 HRPE contained a tandem 5'-GCC-3'. In addition we found that promoter regions with high  
521 scores for the HRPE and HRE2 motif coincided in 40 of the 213 coordinately upregulated  
522 genes, of which 13 were bound at 2HS by HRE2. Finally, the region of the *Arabidopsis ADH1*  
523 promoter that is necessary and sufficient for hypoxic upregulation contains both of these motifs,  
524 as discussed by [15]. Our data do not conflict with the model that the low-oxygen-mediated  
525 stabilization of the constitutively-expressed RAP-type ERFVIs is responsible for rapid  
526 transactivation of HRGs that include *HRE2* [81,82], which is synthesized and stabilized under  
527 hypoxia [7]. It seems likely that HRE2 production and binding to promoters may bolster  
528 upregulation of HRGs, as an *hre1 hre2* double mutant fails to maintain the upregulation of these  
529 genes after 4 h of anoxia [83]. Still, further analyses are required to more fully comprehend the  
530 independent or overlapping roles of the low abundant HRE2 and RAP-type ERFVIs in the  
531 temporal activation of transcription in response to hypoxia.

532 In mammalian systems, the response to hypoxia involves regulation of histone  
533 modifications and transcriptional activity [84]. The similarity to plants is remarkably analogous.  
534 Hypoxia-responsive genes are activated by the two-subunit Hypoxia Inducible Factor (HIF)  
535 transcription factor complex, that includes the oxygen-destabilized HIF1A subunit [85]. Similar  
536 to the three RAP-ERFVIs, HIF1A is a constitutively synthesized protein that is unstable when  
537 oxygen is replete. It is the oxygen-dependent activity of a group of prolylhydroxylases that govern  
538 the hydroxylation of specific residues of HIF1A that triggers its oxygen-dependent ubiquitylation  
539 and proteasome-mediated turnover. In animals, the chromatin landscape is additionally  
540 regulated through chromatin accessibility [86] and the post-translational modification of histones  
541 [87] in an oxygen-sensitive manner. It has been shown that HIF signaling itself directly  
542 mediates histone modification of target genes through the interaction with chromatin modifying  
543 enzymes [84]. Additionally, several histone modifying enzymes are directly targeted by HIF  
544 transcriptional activation, and HIF1A expression itself is regulated by histone acetylation [88],  
545 confirming the integration of epigenetic regulation. The analogy of low-oxygen stabilized  
546 transcriptional regulators and their coordination with chromatin modifications hints of convergent  
547 mechanisms of hypoxia signaling in plants and animals. Indeed, this may extend in a concerted  
548 manner beyond transcriptional regulation as cytoplasmic sequestration and selective translation  
549 of mRNAs is also observed in plants and metazoa [2,3,89,90]. It remains to be explored if  
550 hypoxia influences the synthesis and accumulation of nascent transcripts associated with  
551 growth in animals, as demonstrated in this multiomic analysis of *Arabidopsis*.

552

## 553 **Conclusions**

554 This deep investigation into gene regulatory processes in hypoxic stress revealed distinct  
555 regulation within the nucleus that fine tune cellular and physiological acclimation to transient  
556 deficiencies in oxygen availability. We determined that rapid regulation of the epigenome in  
557 response to short-term hypoxic stress continues as the stress becomes more severe.  
558 Coordinate regulation from chromatin accessibility, to RNAPII engagement, polyadenylated  
559 mRNA accumulation, and translation is observed for over 200 hypoxia-upregulated genes, while

560 more discontinuous upregulation of nascent transcript production, export to the cytoplasm, and  
561 recruitment to ribosomes is observed for other gene cohorts. These findings uncover dynamic  
562 patterns of nuclear gene activity control that operate in response to an environmental challenge.

563

## 564 **Methods**

565

### 566 **Genetic Material**

567 The following genotypes were used for genome wide experiments: Col-0, Histone modification  
568 ChIP-seq, RNAP II ChIP-seq; *pHTA11:HTA11-3xFLAG* [32], H2A.Z ChIP-seq;  
569 *pUBQ10:NTF/pACT2:BirA* [21], ATAC-seq, nRNA-seq, polyA mRNA-seq; *p35S:HF-RPL18* [47],  
570 TRAP-seq, mRNA-seq; and HRE ChIP-seq *p35S:C2A-HRE2-HA* [7].

571

### 572 **Growth and Treatment Conditions**

573 Arabidopsis seeds were surface sterilized by incubation in 70% EtOH for 5 min, followed by  
574 incubation in 20% (v/v) bleach, 0.01% (v/v) TWEEN-20, followed by three washes in ddH<sub>2</sub>O for  
575 5 min, in triplicate. Sterilized seeds were placed onto 1x MS media (1.0x Murishige Skoog (MS)  
576 salts, 0.4% (w/v) Phytigel (Sigma-Aldrich), and 1% (w/v) Suc, pH 5.7) in 9 cm<sup>2</sup> Petri dishes and  
577 stratified by incubation at 4°C for 3 d in complete darkness. Following stratification, plates were  
578 placed vertically into a growth chamber (Percival) with 16 h light / 8 h dark cycle at ~120 μmol  
579 photons·s<sup>-1</sup>·m<sup>-2</sup>, at 23 °C for 7 d.

580

### 581 **Seedling Treatments**

582 For hypoxic stress, seedlings were removed from the growth chamber at Zeitgeber time (ZT) 16  
583 and were subjected to hypoxic stress by bubbling argon gas into sealed chambers in complete  
584 darkness for 2 or 9 h at 24 °C. The chamber set-up was as described by [2]. Oxygen partial  
585 pressure in the chamber was measured with the NeoFox Sport O<sub>2</sub> sensor and probe (Ocean  
586 Optics). Hypoxia ([O<sub>2</sub>] < 2%) was attained within 15 min of initiation of the stress. Control  
587 samples were placed in an identical chamber that was open to ambient air under the same light  
588 and temperature conditions. Post hypoxia aeration was achieved by removing plates from the  
589 chamber and placing them into identical chambers in ambient air. Tissue was rapidly harvested  
590 into liquid N<sub>2</sub> and stored at -80 °C.

591

### 592 **Chromatin Immunopurification (ChIP)**

593 ChIP was performed according to [44] with minor modifications. Seedlings were grown on Petri  
594 dishes and treated as described above. For the HRE2 ChIP experiments, seedlings were pre-  
595 treated by flooding with 10 mL of 100 μM Calpain inhibitor IV (American Peptide) and 1% (v/v)  
596 DMSO for 2 h prior to the hypoxia treatment. For all genotypes, following hypoxia treatment,  
597 seedlings were immediately cross-linked in 1% (v/v) formaldehyde nuclei purification buffer  
598 (NPB: 20 mM MOPS, pH 7.0, 40 mM NaCl, 90 mM KCl, 2 mM EDTA, and 0.5 mM EGTA) in a  
599 vacuum chamber under house vacuum for 10 min. The reaction was quenched by addition of  
600 5M glycine to reach a concentration of 125 mM followed by vacuum infiltration for 5 min. This  
601 was followed by three washes in 30 mL ddH<sub>2</sub>O. Seedlings were blotted dry and then pulverized  
602 under liquid N<sub>2</sub>. To isolate nuclei, 0.5 g tissue was thawed to 4°C in 10 mL NPB that additionally  
603 contained 0.5 mM spermidine, 0.2 mM spermine, and 1 X Plant Protease Inhibitor Cocktail

604 (Sigma-Aldrich P9599). Nuclei were pelleted by centrifugation in 4°C at 1200g for 10 min. The  
605 nuclei were washed in 10 mL NPbt (NPB, 0.1% Triton X-100) and pelleted by centrifugation in  
606 4°C at 1200g for 10 min in triplicate. Following the final NPbt wash, the supernatant was  
607 aspirated and the nuclei pellet was resuspended in 120 µL NPB, and lysed with the addition of  
608 120 µL 2X nuclei lysis buffer (NLB: 100 mM Tris, pH 8.0, 20 mM EDTA, 2% [w/v] SDS, and 2X  
609 Plant Protease Inhibitor Cocktail) by vortexing for 2 min at 24 °C. The chromatin was sheared  
610 into 200 to 600 bp fragments by sonication (Diagenode, Denville, NJ) with 33 cycles of 30 s ON  
611 and 30 s OFF at 4°C. The sample was cleared by centrifugation at 16,000g at 4°C for 2 min and  
612 the supernatant was diluted ten-fold with dilution buffer (DB: 16.7 mM Tris, pH8.0, 167 mM  
613 NaCl, 1.1% (v/v) Triton X-100, 1.2 mM EDTA). The entire chromatin fraction was precleared by  
614 incubation with uncoupled Protein G Dynabeads (ThermoFisher) for 30 min followed by  
615 collection of the supernatant. Three hundred microliters of the input chromatin (1 mL for HRE2)  
616 was incubated with 3 µL of anti-H3K4me3 (ab8580, Abcam), anti-H3K27me3 (07-449, EMD  
617 Millipore), anti-H3K9ac (ab4441, Abcam), anti-H3K14ac (ab52946, Abcam), anti-p-CTD RNA  
618 Polymerase II (ab5095, Abcam), anti-FLAG (F1804, Sigma), or anti-HA (h3663, Sigma) for 4 h  
619 (overnight for HRE2) while rocking at 4°C. Protein G Dynabeads (30 µL) were washed in DB,  
620 added to the chromatin fraction and allowed to incubate for 2 h while rocking at 4°C. Beads  
621 were magnetically captured and washed sequentially in 1 mL for 5 min with four buffers: low  
622 NaCl<sub>2</sub> wash buffer (20 mM Tris, pH 8.0, 150 mM NaCl, 0.1% [w/v] SDS, 1% [v/v] Triton X-100,  
623 2mM EDTA), high NaCl<sub>2</sub> wash buffer (20 mM Tris, pH 8.0, 500 mM NaCl<sub>2</sub>, 0.1% [w/v] SDS, 1%  
624 [v/v] Triton X-100, 2mM EDTA), LiCl wash buffer (10 mM Tris, pH 8.0, 250 mM LiCl, 1% [w/v]  
625 sodium deoxycholate, 1% [v/v] Nonidet P-40, 1 mM EDTA), and standard TE buffer (10 mM  
626 Tris, pH 8.0, 1 mM EDTA). The beads were then washed twice with 10 mM Tris, pH 8.0 and  
627 resuspended in 25 µL of tagmentation reaction mix (10 mM Tris, pH 8.0, 5 mM MgCl<sub>2</sub>, 10% [w/v]  
628 dimethylformamide) containing 1 µL of Tagment DNA Enzyme (Illumina) and incubated at 37°C  
629 for 1 minute. Beads were washed twice with low NaCl<sub>2</sub> wash buffer and then once in standard  
630 TE buffer. The chromatin was eluted from the beads by heating for 15 min at 65°C in elution  
631 buffer (EB: 100 mM NaHCO<sub>3</sub> and 1% [w/v] SDS) and reverse cross-linked by the addition of 20  
632 µL 5 M NaCl<sub>2</sub> with heating at 65°C overnight. Following reverse cross-linking, Proteinase K (0.8  
633 units; New England Biolabs) was added and the sample was incubated at 55°C for 15 min. The  
634 final tagged ChIP-DNA sample was purified using Qiagen MinElute columns according to the  
635 manufacturer's instructions and eluted with 14 µL of EB.

636

### 637 **ChIP-seq Library Preparation**

638 Library preparation for short-read sequencing (ChIP-seq) with tagmentation was performed  
639 according to [92], with minor modifications. Final library enrichment was performed in a 50 µL  
640 reaction containing 12 µL ChIP DNA, 0.75 µM primers, and 25 µL 2X NEBNext PCR Master  
641 Mix. To determine the appropriate amplification cycle number, a qPCR reaction was performed  
642 on 1 µL of tagmented ChIP DNA in a 10 µL reaction volume containing 0.15 µM primers, 1X  
643 SybrGreen (ThermoFisher), and 5 µL 2X NEBNext PCR Master Mix (New England Biolabs) with  
644 the following program: 72°C for 5 min, 98°C for 30 s, 24 cycles of 98°C for 10 s, 63°C for 30 s,  
645 72°C for 30 s, and a final elongation at 72°C for 1 min. Libraries were amplified for *n* cycles,  
646 where *n* is equal to the rounded up C<sub>q</sub> value determined in the qPCR reaction. Amplified  
647 libraries were purified and size selected using SPRI AMPure XP beads (Beckman). AMPure XP



648 beads were added at a 0.7:1.0 bead to sample ratio, and the remaining DNA was recovered by  
649 the addition of AMPure XP beads at a 2.0:1.0 bead to sample ratio and eluted in 13  $\mu$ L of EB.  
650 Quantification of the final libraries was performed with Quant-iT PicoGreen (ThermoFisher), and  
651 library fragment distribution was evaluated by use of the the Agilent 2100 Bioanalyzer using the  
652 high sensitivity DNA chip. Final libraries were multiplexed to >5 nM final concentration and  
653 sequenced on the HiSeq 3000/4000 at the UC Davis DNA Technologies Core.

654

#### 655 **Isolation of Nuclei Tagged in Specific Cell Types (INTACT)**

656 INTACT was performed according to [44] with modifications. Frozen pulverized tissue (0.5 g) of  
657 *pUBQ:NTF/pACT2:BirA* seedlings was thawed in 10 mL of cold NPB buffer and filtered through  
658 30  $\mu$ m filters (Sysmex). Nuclei were pelleted by centrifugation at 1200g for 7 min at 4°C, and  
659 the nuclear pellet was resuspended and washed twice in NPB containing 0.1% (v/v) Tween-20  
660 (NPBt), and the washed pellet was resuspended in 1 mL of NPB. M280 Streptavidin  
661 Dynabeads (10  $\mu$ L; Invitrogen) washed with 1 mL NPB and resuspended in the original volume  
662 were added to the nuclei and the sample was allowed to rock for 30 min at 4°C. The bead-  
663 nuclei mixture was diluted to 14 mL with NPBt and incubated with rocking for 30 s at 4°C. The  
664 beads were magnetically collected, the supernatant removed, the beads washed twice with  
665 NPBt, and resuspended in 1 mL of NPBt. A 25  $\mu$ L fraction was removed to quantify nuclei  
666 following addition of 1  $\mu$ L of 1.0  $\mu$ g/ $\mu$ L Propidium Iodide following incubation on ice for 5 min  
667 before visualization and quantification with a C-Chip hemocytometer (Incyto) using a  
668 fluorescence microscope.

669

#### 670 **Assay for Transposase Accessible Chromatin (ATAC)**

671 Fifty-thousand INTACT-purified nuclei from root tissue were magnetically captured. Any  
672 remaining NPB was removed and the nuclei were resuspended in 50  $\mu$ L of transposition mix (1X  
673 TD buffer, 2.5  $\mu$ L TDE1 transposase) and were incubated for 30 min at 37°C with occasional  
674 mixing. The transposed DNA was purified with Qiagen MinElute PCR purification columns, and  
675 the purified DNA was eluted in 11  $\mu$ L of EB. For library construction, a reaction was prepared to  
676 amplify the sample in a two step process. The reaction was assembled containing transposed  
677 DNA (10  $\mu$ L), 5  $\mu$ M Ad1.1 and an indexing primer [23], 1X NEBNext High Fidelity PCR mix and  
678 cycled in the following program: 72°C 5 min; 98°C 30 s; 3 cycles of 98°C 10 s, 63°C 30s, 72°C 1  
679 min; 4°C and the samples were placed on ice. Then a qPCR was performed using an aliquot of  
680 the amplified library with the following program: 98°C for 30 s; 20 cycles of 98°C for 10 s, 63°C  
681 for 30 s, 72°C for 1 min. The original PCR reaction was resumed for  $n$  additional cycles, where  
682  $n$  is the cycle at which the qPCR reaction was at 1/3 of its maximum fluorescence intensity.  
683 Amplified DNA was then purified with Qiagen MinElute PCR purification columns and eluted in  
684 20  $\mu$ L of EB. Amplified libraries were purified and size selected for fragments between 200 to  
685 600 bp using SPRI AMPure XP beads (Beckman). AMPure XP beads were added at a 0.55:1.0  
686 bead to sample ratio, and the remaining DNA was recovered by the addition of AMPure XP  
687 beads at a 1.55:1.0 bead to sample ratio and eluted in 13  $\mu$ L of EB. Library concentration was  
688 determined using the NEBNext (New England Biolabs) library quantification kit. Final libraries  
689 were multiplexed to >5 nM final concentration and sequenced on the HiSeq 3000/4000 at the  
690 UC Davis DNA Technologies Core.

691

692 **INTACT followed by Nuclear RNA Extraction**

693 Fifty-thousand INTACT-purified nuclei were collected magnetically and the supernatant was  
694 removed, and resuspended in 20  $\mu$ L of NPB. Nuclear RNA was extracted and purified using the  
695 Qiagen RNeasy Micro kit, and eluted in 20  $\mu$ L of H<sub>2</sub>O. The RNA was then DNaseI digested with  
696 with 1  $\mu$ L (2U/ $\mu$ L) of Turbo DNaseI (Ambion) and incubated for 30 min at 37°C. DNaseI was  
697 inactivated by adding EDTA to 15 mM, and heated at 75°C for 10 min, centrifuged at 2000g for  
698 5 min and transferred to a new tube. The RNA was then purified using AMPure XP beads, and  
699 eluted in 15  $\mu$ L H<sub>2</sub>O. Ribosomal RNA was depleted from the sample using the plant Ribo-Zero  
700 rRNA removal kit (Illumina) according to the manufacturer's instructions.

701

702 **Total RNA Isolation and PolyA RNA Affinity Purification**

703 Total RNA was extracted from 50 mg frozen pulverized tissue by addition of 800  $\mu$ L Trizol (Life  
704 Sciences) and incubation for 5 min at room temperature. Chloroform (200  $\mu$ L) was added and  
705 the sample briefly vortexed and incubated at room temperature for 3 min. Following incubation,  
706 the samples were centrifuged at 12,000g for 15 min at 4°C, and the clear phase was transferred  
707 to a new tube. RNA was precipitated by addition of 500  $\mu$ L isopropanol, vortexing briefly, and  
708 incubation at room temperature for 10 min, and pelleted by centrifugation at 12,000g for 10 min  
709 at 4°C. Purified RNA was resuspended in 50  $\mu$ L EB and DNaseI digested with 2.5  $\mu$ L of  
710 TURBO DNaseI (Ambion) for 30 min at 37°C. DNaseI was inactivated by addition of EDTA to  
711 15 mM and heat treatment at 75°C for 10 min. The RNA was pelleted by centrifugation at  
712 2000g for 5 min and transferred to a new tube. The RNA was then purified using AMPure XP  
713 beads, and eluted in 50  $\mu$ L H<sub>2</sub>O. For polyA RNA selection, the total RNA sample was heated for  
714 2 min at 65°C and placed on ice, after which 50  $\mu$ L of Dynabeads Oligo (dT)<sub>25</sub> pre-washed with  
715 wash buffer (WB: 10 mM Tris, pH 7.5, 150 mM LiCl, 1 mM EDTA) were added and the sample  
716 incubated at room temperature for 15 min with agitation. The beads were magnetically  
717 separated and washed twice with WB. For RNA elution, 50  $\mu$ L EB was added and the sample  
718 heated for 2 min at 80°C and the eluted RNA was transferred to a new tube. The polyA RNA  
719 selection was repeated a second time and eluted in a volume of 16  $\mu$ L.

720

721 **Translating Ribosome Affinity Purification (TRAP)-seq**

722 TRAP of mRNA-ribosome complexes was performed following the procedure of [17]. Briefly,  
723 pulverized tissue (1 mL) from the *35S:HF-RPL18* genotype was added to 5 mL of polysome  
724 extraction buffer (PEB: 200 mM Tris, pH 9.0, 200 mM KCl, 25 mM EGTA, 35 mM MgCl<sub>2</sub>, 1%  
725 PTE, 1 mM DTT, 1 mM PMSF, 100  $\mu$ g/mL cycloheximide, 50  $\mu$ g/mL chloramphenicol)  
726 containing 1% detergent mix (20% (w/v) polyoxyethylene(23)lauryl ether, 20% (v/v) Triton X-  
727 100, 20% (v/v) Octylphenyl-polyethylene glycol, 20% (v/v) Polyoxyethylene sorbitan  
728 monolaurate 20) and homogenized with a glass homogenizer on ice. The homogenized mixture  
729 was allowed to stand for 10 min on ice and then centrifuged at 16,000g at 4°C for 15 min.  
730 Following centrifugation, the supernatant was transferred to a new tube and filtered through one  
731 layer of Miracloth (Millipore) to produce the clarified extract.

732 Protein G Dynabeads (50 $\mu$ L; ThermoFisher) were prewashed twice with 1.5 mL of wash  
733 buffer (WB-T: 200 mM Tris, pH 9.0, 200 mM KCl, 25 mM EGTA, 35 mM MgCl<sub>2</sub>, 5 mM PMSF, 50  
734  $\mu$ g/mL cycloheximide, 50  $\mu$ g/mL chloramphenicol) by suspension and magnetic collection, with  
735 final re-suspension in the original volume. These were added to the clarified tissue extract and

736 incubated at 4°C for 2 h with gentle rocking. The beads were collected magnetically, the  
737 supernatant was removed, and the beads were gently resuspended in 6 mL WB-T for 5 min at  
738 4°C with rocking. This wash step was repeated two additional times, after which the beads were  
739 resuspended in 1 mL WB-T and transferred to a new tube and the supernatant was removed.

740 RNA was purified from the sample and the reserved clarified extract by addition of 105 µl  
741 of LBB (LBB: 100 mM Tris, pH 8.0, 500 mM LiCl, 10 mM EDTA, 1% (w/v) SDS, 5 mM DTT,  
742 1.5% (v/v) Antifoam A, 5 µl/mL 2-mercaptoethanol) followed by vortexing for 5 min. Samples  
743 were incubated at room temperature for 10 min, centrifuged at 13,000g for 10 min and  
744 transferred to a new tube. Poly(A)<sup>+</sup> RNA selection was performed by addition of 1 µl of 12.5 µM  
745 biotin-20nt-dT oligos (Integrated DNA Technologies) to 200 µl of the TRAP or RNA lysate  
746 sample, followed by incubation at room temperature for 10 min. In a separate tube 20 µl  
747 magnetic streptavidin beads (New England Biolabs) were washed with 200 µl LBB. The lysate  
748 was added to the washed beads and incubated at room temperature for 10 min with gentle  
749 agitation. The beads were magnetically separated and washed sequentially with wash buffer A  
750 (WBA:10 mM Tris, pH 8.0, 150 mM LiCl, 1 mM EDTA, 0.1% (w/v) SDS), wash buffer B (WBB:10  
751 mM Tris, pH 8.0, 150 mM LiCl, 1 mM EDTA), and low salt buffer (LSB: 20 mM Tris, pH 8.0, 150  
752 mM NaCl, 1 mM EDTA). Following washes, the pellet was resuspended in 16 µl 10 mM Tris,  
753 pH 8.0 containing 1 mM 2-Mercaptoethanol and heated at 80°C for 2 min. The beads were  
754 magnetically collected, the supernatant was transferred to a new tube, and the poly(A)<sup>+</sup> RNA  
755 selection process was repeated, and the samples combined in a new tube before storage at -  
756 80°C.

757

### 758 **RNA-seq Library Preparation**

759 RNA-seq library preparation for nRNA, polyA, and TRAP RNA was performed as described in  
760 Kumar et al., 2012 [93]. In brief, RNA was fragmented and primed for first strand synthesis with  
761 random hexamers (Invitrogen). First strand synthesis was performed, followed by second  
762 strand synthesis, end repair, and A-tailing. Universal sequencing adapters were ligated to  
763 cDNA molecules. An initial enrichment and adapter extension PCR was first performed on  
764 0.25x volume of the ligated products for each sample to determine amplification cycle number to  
765 prevent overamplification of sequencing libraries. A final enrichment and adapter extension  
766 PCR was performed with 0.25x starting volume for the specified cycle number (13-15 cycles) for  
767 each sample. Following enrichment, purification, size selection of libraries, and sequencing was  
768 performed as described for ChIP-seq.

769

### 770 **Bioinformatic Analyses**

771 For all high throughput outputs, short reads were trimmed using FASTX-toolkit to remove  
772 barcodes and filter short and low quality reads prior to alignment to the TAIR10 genome with  
773 Bowtie2/Tophat2. Read quality reports were generated using fastqc. For all datasets, counting  
774 of aligned reads was performed on entire transcripts [94] using the latest Araport 11 annotation  
775 (201606) and reads per kilobase of transcript per million mapped reads (RPKM) values were  
776 calculated. Differentially expressed genes were determined by edgeR,  $|FC| > 1$ , FDR < 0.01.

777 *Data visualization and file generation:* Bigwig files for Integrated Genome Viewer (IGV)  
778 visualization were generated from aligned bam files and normalized by RPKM values using the  
779 deepTools command bamCoverage with the -normalizeUsingRPKM specification. Within IGV,

780 all chromatin based outputs were normalized to the same scale and all RNA outputs were  
781 normalized to a separate scale.

782 *Peak calling:* For ChIP-seq and ATAC-seq datasets, peak calling was performed using  
783 independent replicates in combination as input for HOMER using the findPeaks command [95].  
784 For downstream analyses, peaks identified from each time point comparison were combined  
785 and counting was performed on individual replicates. Peaks were annotated using the HOMER  
786 command annotatePeaks.pl. Differential regulation of peaks was performed using edgeR.

787 *Motif discovery:* HRE2 peaks identified by HOMER command findPeaks were used as  
788 an input for the HOMER command findMotifsGenome.pl. The matrix for the top HRE2 motif ( $p$ :  
789  $1e-69$ ) was used as input the MEME command ceqlogo to generate the motif logo.

790 *DAP-seq motif analysis:* Sequences of promoter regions spanning 1 kb upstream to 500  
791 bp downstream of the TSS were extracted for genes within each cluster. The promoter  
792 sequences were compared against each TF, per TF family, using motif matrices identified by  
793 [53]. The number of significant motifs identified within the promoters of each cluster were  
794 quantitated and normalized to the number of genes within each cluster.

795 *t-distributed stochastic neighbor embedding (t-SNE):* t-SNE analysis was performed  
796 according to [96]. Briefly, a principal component analysis was performed using RPKM values  
797 for each replicated dataset and timepoint. t-SNE was then performed on PCs 1-10 and the  
798 results were plotted using ggplot2.

799 *Wilcoxon signed rank sum test:* Wilcoxon signed rank sum test was performed by  
800 comparing the RPKM values of one genomic output for each gene within a cluster to the genes  
801 of another cluster. Each cluster was compared individually to all other clusters to determine  
802 significance,  $p < 0.05$ .

803 *Fisher's exact test:* Fisher's exact test was performed by comparing the number of motifs  
804 / peaks associated with genes within a cluster to the total number of motifs / peaks identified for  
805 all DRGs. Significance

806

## 807 **Bioinformatic Tools**

808 Analyses were performed with Bioconductor R packages particularly the Next Generation  
809 Sequencing analysis software of systemPipeR [97]. Programs used within Bioconductor  
810 included: BiocParallel [98], BatchJobs [99], GenomicFeatures [94], GenomicRanges [94],  
811 edgeR [100], gplots [101], ggplot2 [102], RColorBrewer [103], Dplyr [104], biomaRt [105],  
812 ChIPseeker [106], rtracklayer [107], Rtsne [108], Pheatmap [109], e1071 [110], cluster [111],  
813 ShortRead [112], and Rsamtools [113]. The Publically available UNIX/Python/Perl packages  
814 used included Tophat [114], fastx\_toolkit [115], Fastqc [116], MEME [117], HOMER [95],  
815 deepTools [118], circos [119], Bedtools [120], samtools [121].

816 **Declarations**

817 **Ethics approval and consent to participate**

818 Not applicable

819

820 **Consent for publication**

821 Not applicable

822

823 **Availability of data and material**

824 The datasets generated and/or analysed during the current study are available in the NCBI

825 GEO repository

826

827 **Competing interests**

828 The authors declare that they have no competing interests.

829

830 **Funding**

831 This work was supported by U.S. National Science Foundation (Grant Nos. IOS-1121626, IOS-

832 1238243, MCB-1716913) and the U.S. Department of Agriculture, National Institute of Food and

833 Agriculture - Agriculture and Food Research Initiative (Grant No. 2011-04015) to J.B.-S..

834

835 **Authors' contributions**

836 T.L. and J.B.-S. designed research; T.L. performed research; T.L. and J.B.-S. analyzed data;  
837 and T.L. and J.B.-S. wrote the paper.

838

839 **Acknowledgements**

840 We thank Mauricio Reynoso, Roger Deal, Marko Bajic, Seung-Cho Lee, Maureen Hummel,

841 Lauren Dedow, Sonja Winte, Jérémie Bazin, Thomas Girke, and Thomas Eulgem for helpful

842 discussions. This work was supported by U.S. National Science Foundation (Grant Nos.

843 IOS-1121626, IOS-1238243, MCB-1716913) and the U.S. Department of Agriculture, National

844 Institute of Food and Agriculture - Agriculture and Food Research Initiative (Grant No.

845 2011-04015) to J.B.-S..

846

847 **Authors' information (optional)**

848 The current location of T.L. is: Plant Biology Laboratory, The Salk Institute for Biological  
849 Studies, La Jolla, CA 92037, USA

850

851 **Supplemental Tables**

852 Table S1: Tabulation of ATAC and HRE2-ChIP peaks on chromatin

853 Table S2: Survey of histones, RNAPII, HRE2 and three RNA sub-populations in response to two

854 durations of hypoxic stress

855 Table S3: nRNA Enrichment and Gene Ontology Analysis

856 Table S4: Gene Ontology Analysis for two durations of hypoxic stress in Table S2

857 Table S5: List of Arabidopsis Blacklisted Chromatin (ABC)

858

859 **Supplemental Note**

860 ***Arabidopsis* blacklisted chromatin**

861 The variety of genome-wide outputs in this study recording dynamics at the level of chromatin  
862 and RNA has permitted the identification of Tn5 bias/genomic regions with high nonspecific  
863 background and/or high signal/read counts in Arabidopsis irrespective of experiment, similar to  
864 regions identified by the ENCODE project for other organisms [91]. The identification and  
865 filtering of genomic blacklisted regions is especially important for calculation of genome wide  
866 Pearson correlations and the generation of signal tracks used for accurate browser views. The  
867 *Arabidopsis* Blacklisted Chromatin (ABC) regions ([Table S5](#)) can be used to remove these  
868 defined regions that create statistical artefacts of the nuclear genome prior to performing  
869 analyses of chromatin-based data.

## References

1. Branco-Price C, Kawaguchi R, Ferreira RB, Bailey-Serres J. Genome-wide analysis of transcript abundance and translation in Arabidopsis seedlings subjected to oxygen deprivation. *Ann Bot. Oxford University Press*; 2005;96:647–60.
2. Branco-Price C, Kaiser KA, Jang CJH, Larive CK, Bailey-Serres J. Selective mRNA translation coordinates energetic and metabolic adjustments to cellular oxygen deprivation and reoxygenation in Arabidopsis thaliana. *Plant J.* 2008;56:743–55.
3. Juntawong P, Girke T, Bazin J, Bailey-Serres J. Translational dynamics revealed by genome-wide profiling of ribosome footprints in Arabidopsis. *Proc Natl Acad Sci U S A.* 2014;111:E203–12.
4. Sorenson R, Bailey-Serres J. Selective mRNA sequestration by OLIGOURIDYLATE-BINDING PROTEIN 1 contributes to translational control during hypoxia in Arabidopsis. *Proc Natl Acad Sci U S A.* 2014;111:2373–8.
5. Xu K, Xu X, Fukao T, Canlas P, Maghirang-Rodriguez R, Heuer S, et al. Sub1A is an ethylene-response-factor-like gene that confers submergence tolerance to rice. *Nature.* 2006;442:705–8.
6. Hattori Y, Nagai K, Furukawa S, Song X-J, Kawano R, Sakakibara H, et al. The ethylene response factors SNORKEL1 and SNORKEL2 allow rice to adapt to deep water. *Nature.* 2009;460:1026–30.
7. Gibbs DJ, Lee SC, Isa NM, Gramuglia S, Fukao T, Bassel GW, et al. Homeostatic response to hypoxia is regulated by the N-end rule pathway in plants. *Nature.* 2011;479:415–8.
8. Licausi F, Kosmacz M, Weits DA, Giuntoli B, Giorgi FM, Voesenek LACJ, et al. Oxygen sensing in plants is mediated by an N-end rule pathway for protein destabilization. *Nature.* 2011;479:419–22.
9. Yang C-Y, Hsu F-C, Li J-P, Wang N-N, Shih M-C. The AP2/ERF transcription factor AtERF73/HRE1 modulates ethylene responses during hypoxia in Arabidopsis. *Plant Physiol.* 2011;156:202–12.
10. Abbas M, Berckhan S, Rooney DJ, Gibbs DJ, Vicente Conde J, Sousa Correia C, et al. Oxygen sensing coordinates photomorphogenesis to facilitate seedling survival. *Curr Biol.* 2015;25:1483–8.
11. Eysholdt-Derzso E, Sauter M. Root Bending Is Antagonistically Affected by Hypoxia and ERF-Mediated Transcription via Auxin Signaling. *Plant Physiol.* 2017;175:412–23.
12. Paul MV, Iyer S, Amerhauser C, Lehmann M, van Dongen JT, Geigenberger P. Oxygen Sensing via the Ethylene Response Transcription Factor RAP2.12 Affects Plant Metabolism and Performance under Both Normoxia and Hypoxia. *Plant Physiol.* 2016;172:141–53.
13. Giuntoli B, Perata P. Group VII Ethylene Response Factors in Arabidopsis: regulation and physiological roles. *Plant Physiol [Internet].* 2017; Available from: <http://dx.doi.org/10.1104/pp.17.01225>
14. White MD, Klecker M, Hopkinson RJ, Weits DA, Mueller C, Naumann C, et al. Plant cysteine oxidases are dioxygenases that directly enable arginyl transferase-catalysed arginylation of N-end rule targets. *Nat Commun.* 2017;8:14690.
15. Gasch P, Fundinger M, Müller JT, Lee T, Bailey-Serres J, Mustroph A. Redundant ERF-VII transcription factors bind an evolutionarily-conserved cis-motif to regulate hypoxia-responsive gene expression in Arabidopsis. *Plant Cell [Internet]. American Society of Plant Biologists;* 2015; Available from: <http://www.plantcell.org/content/early/2015/12/14/tpc.15.00866>
16. Giuntoli B, Lee SC, Licausi F, Kosmacz M, Oosumi T, van Dongen JT, et al. A trihelix DNA binding protein counterbalances hypoxia-responsive transcriptional activation in Arabidopsis. *PLoS Biol.* 2014;12:e1001950.

17. Mustroph A, Zanetti ME, Jang CJH, Holtan HE, Repetti PP, Galbraith DW, et al. Profiling translomes of discrete cell populations resolves altered cellular priorities during hypoxia in Arabidopsis. *Proc Natl Acad Sci U S A*. 2009;106:18843–8.
18. Bui LT, Giuntoli B, Kosmacz M, Parlanti S, Licausi F. Constitutively expressed ERF-VII transcription factors redundantly activate the core anaerobic response in Arabidopsis thaliana. *Plant Sci*. 2015;236:37–43.
19. Giuntoli B, Licausi F, van Veen H, Perata P. Functional Balancing of the Hypoxia Regulators RAP2.12 and HRA1 Takes Place in vivo in Arabidopsis thaliana Plants. *Front Plant Sci*. 2017;8:591.
20. Weits DA, Giuntoli B, Kosmacz M, Parlanti S, Hubberten H-M, Riegler H, et al. Plant cysteine oxidases control the oxygen-dependent branch of the N-end-rule pathway. *Nat Commun*. 2014;5:3425.
21. Sullivan AM, Arsovski AA, Lempe J, Bubb KL, Weirauch MT, Sabo PJ, et al. Mapping and dynamics of regulatory DNA and transcription factor networks in A. thaliana. *Cell Rep*. 2014;8:2015–30.
22. Sullivan AM, Bubb KL, Sandstrom R, Stamatoyannopoulos JA, Queitsch C. DNase I hypersensitivity mapping, genomic footprinting, and transcription factor networks in plants. *Current Plant Biology*. 2015;3-4:40–7.
23. Buenrostro JD, Giresi PG, Zaba LC, Chang HY, Greenleaf WJ. Transposition of native chromatin for fast and sensitive epigenomic profiling of open chromatin, DNA-binding proteins and nucleosome position. *Nat Methods*. 2013;10:1213–8.
24. Talbert PB, Henikoff S. Histone variants on the move: substrates for chromatin dynamics. *Nat Rev Mol Cell Biol*. 2017;18:115–26.
25. Gates LA, Foulds CE, O'Malley BW. Histone Marks in the “Driver”s Seat’: Functional Roles in Steering the Transcription Cycle. *Trends Biochem Sci*. 2017;42:977–89.
26. Asensi-Fabado M-A, Amtmann A, Perrella G. Plant responses to abiotic stress: The chromatin context of transcriptional regulation. *Biochim Biophys Acta*. 2017;1860:106–22.
27. Eberharter A, Becker PB. Histone acetylation: a switch between repressive and permissive chromatin. Second in review series on chromatin dynamics. *EMBO Rep*. 2002;3:224–9.
28. Kim J-M, To TK, Ishida J, Matsui A, Kimura H, Seki M. Transition of chromatin status during the process of recovery from drought stress in Arabidopsis thaliana. *Plant Cell Physiol*. 2012;53:847–56.
29. Kim J-M, To TK, Ishida J, Morosawa T, Kawashima M, Matsui A, et al. Alterations of lysine modifications on the histone H3 N-tail under drought stress conditions in Arabidopsis thaliana. *Plant Cell Physiol*. 2008;49:1580–8.
30. Kumar SV, Wigge PA. H2A.Z-containing nucleosomes mediate the thermosensory response in Arabidopsis. *Cell*. 2010;140:136–47.
31. Sura W, Kabza M, Karlowski WM, Bieluszewski T, Kus-Slowinska M, Pawełozek Ł, et al. Dual Role of the Histone Variant H2A.Z in Transcriptional Regulation of Stress-Response Genes. *Plant Cell*. 2017;29:791–807.
32. Cortijo S, Charoensawan V, Brestovitsky A, Buning R, Ravarani C, Rhodes D, et al. Transcriptional Regulation of the Ambient Temperature Response by H2A.Z Nucleosomes and HSF1 Transcription Factors in Arabidopsis. *Mol Plant*. 2017;10:1258–73.
33. Dai X, Bai Y, Zhao L, Dou X, Liu Y, Wang L, et al. H2A.Z Represses Gene Expression by Modulating Promoter Nucleosome Structure and Enhancer Histone Modifications in Arabidopsis. *Mol Plant*. 2017;10:1274–92.
34. Torres ES, Deal RB. The histone variant H2A. Z and chromatin remodeler BRAHMA act coordinately and antagonistically to regulate transcription and nucleosome dynamics in Arabidopsis. *bioRxiv*. Cold Spring Harbor Laboratory; 2018;243790.
35. Hajheidari M, Koncz C, Eick D. Emerging roles for RNA polymerase II CTD in Arabidopsis. *Trends Plant Sci*. 2013;18:633–43.



36. Milligan L, Huynh-Thu VA, Delan-Forino C, Tuck A, Petfalski E, Lombraña R, et al. Strand-specific, high-resolution mapping of modified RNA polymerase II. *Mol Syst Biol.* 2016;12:874.
37. Phatnani HP, Greenleaf AL. Phosphorylation and functions of the RNA polymerase II CTD. *Genes Dev.* 2006;20:2922–36.
38. Jonkers I, Lis JT. Getting up to speed with transcription elongation by RNA polymerase II. *Nat Rev Mol Cell Biol.* 2015;16:167–77.
39. Hetzel J, Duttke SH, Benner C, Chory J. Nascent RNA sequencing reveals distinct features in plant transcription. *Proc Natl Acad Sci U S A.* 2016;113:12316–21.
40. Zhu J, Liu M, Liu X, Dong Z. RNA polymerase II activity revealed by GRO-seq and pNET-seq in Arabidopsis. *Nat Plants [Internet].* 2018; Available from: <http://dx.doi.org/10.1038/s41477-018-0280-0>
41. Van Veen H, Vashisht D, Akman M, Girke T. Transcriptomes of eight Arabidopsis thaliana accessions reveal core conserved, genotype-and organ-specific responses to flooding stress. *Plant [Internet]. Am Soc Plant Biol;* 2016; Available from: <http://www.plantphysiol.org/content/early/2016/05/15/pp.16.00472.abstract>
42. de Lorenzo L, Sorenson R, Bailey-Serres J, Hunt AG. Noncanonical Alternative Polyadenylation Contributes to Gene Regulation in Response to Hypoxia. *Plant Cell.* 2017;29:1262–77.
43. Niedojadło J, Deteńko K, Niedojadło K. Regulation of poly(A) RNA retention in the nucleus as a survival strategy of plants during hypoxia. *RNA Biol.* 2016;13:531–43.
44. Deal RB, Henikoff S. A simple method for gene expression and chromatin profiling of individual cell types within a tissue. *Dev Cell.* 2010;18:1030–40.
45. Maher KA, Bajic M, Kajala K, Reynoso M, Pauluzzi G, West DA, et al. Profiling of Accessible Chromatin Regions across Multiple Plant Species and Cell Types Reveals Common Gene Regulatory Principles and New Control Modules. *Plant Cell.* 2018;30:15–36.
46. Reynoso M, Pauluzzi G, Kajala K, Cabanlit S, Velasco J, Bazin J, et al. Nuclear transcriptomes at high resolution using retooled INTACT. *Plant Physiol [Internet].* 2017; Available from: <http://dx.doi.org/10.1104/pp.17.00688>
47. Zanetti ME, Chang I-F, Gong F, Galbraith DW, Bailey-Serres J. Immunopurification of polyribosomal complexes of Arabidopsis for global analysis of gene expression. *Plant Physiol.* 2005;138:624–35.
48. Lu Z, Hofmeister BT, Vollmers C, DuBois RM, Schmitz RJ. Combining ATAC-seq with nuclei sorting for discovery of cis-regulatory regions in plant genomes. *Nucleic Acids Res [Internet].* 2016; Available from: <http://dx.doi.org/10.1093/nar/gkw1179>
49. Sijacic P, Bajic M, McKinney EC, Meagher RB, Deal RB. Chromatin accessibility changes between Arabidopsis stem cells and mesophyll cells illuminate cell type-specific transcription factor networks [Internet]. *bioRxiv.* 2017 [cited 2018 Apr 5]. p. 213900. Available from: <https://www.biorxiv.org/content/early/2017/11/03/213900.abstract>
50. Ansari A, Hampsey M. A role for the CPF 3'-end processing machinery in RNAP II-dependent gene looping. *Genes Dev.* 2005;19:2969–78.
51. Ozsolak F, Poling LL, Wang Z, Liu H, Liu XS, Roeder RG, et al. Chromatin structure analyses identify miRNA promoters. *Genes Dev.* 2008;22:3172–83.
52. Frank A, Mantioli CC, Viana AJC, Hearn TJ, Kusakina J, Belbin FE, et al. Circadian Entrainment in Arabidopsis by the Sugar-Responsive Transcription Factor bZIP63. *Curr Biol.* 2018;28:2597–606.e6.
53. O'Malley RC, Huang S-SC, Song L, Lewsey MG, Bartlett A, Nery JR, et al. Cistrome and Epicistrome Features Shape the Regulatory DNA Landscape. *Cell.* 2016;166:1598.
54. Gibbs DJ, Md Isa N, Movahedi M, Lozano-Juste J, Mendiondo GM, Berckhan S, et al. Nitric oxide sensing in plants is mediated by proteolytic control of group VII ERF transcription factors. *Mol Cell.* 2014;53:369–79.

55. Büttner M, Singh KB. Arabidopsis thaliana ethylene-responsive element binding protein (AtEBP), an ethylene-inducible, GCC box DNA-binding protein interacts with an ocs element binding protein. *Proc Natl Acad Sci U S A*. 1997;94:5961–6.
56. Loreti E, Poggi A, Novi G, Alpi A, Perata P. A genome-wide analysis of the effects of sucrose on gene expression in Arabidopsis seedlings under anoxia. *Plant Physiol*. 2005;137:1130–8.
57. Chang R, Jang CJH, Branco-Price C, Nghiem P, Bailey-Serres J. Transient MPK6 activation in response to oxygen deprivation and reoxygenation is mediated by mitochondria and aids seedling survival in Arabidopsis. *Plant Mol Biol*. 2012;78:109–22.
58. Baxter-Burrell A, Yang Z, Springer PS, Bailey-Serres J. RopGAP4-dependent Rop GTPase rheostat control of Arabidopsis oxygen deprivation tolerance. *Science*. 2002;296:2026–8.
59. Pucciariello C, Parlanti S, Banti V, Novi G, Perata P. Reactive oxygen species-driven transcription in Arabidopsis under oxygen deprivation. *Plant Physiol*. 2012;159:184–96.
60. Gonzali S, Loreti E, Cardarelli F, Novi G, Parlanti S, Pucciariello C, et al. Universal stress protein HRU1 mediates ROS homeostasis under anoxia. *Nat Plants*. 2015;1:15151.
61. Yeung E, van Veen H, Vashisht D, Sobral Paiva AL, Hummel M, Rankenberg T, et al. A stress recovery signaling network for enhanced flooding tolerance in Arabidopsis thaliana. *Proc Natl Acad Sci U S A*. 2018;115:E6085–94.
62. Banti V, Mafessoni F, Loreti E, Alpi A, Perata P. The heat-inducible transcription factor HsfA2 enhances anoxia tolerance in Arabidopsis. *Plant Physiol*. 2010;152:1471–83.
63. Kawaguchi R, Bailey-Serres J. mRNA sequence features that contribute to translational regulation in Arabidopsis. *Nucleic Acids Res*. 2005;33:955–65.
64. Roy B, von Arnim AG. Translational Regulation of Cytoplasmic mRNAs. *Arabidopsis Book*. 2013;11:e0165.
65. Mustroph A, Lee SC, Oosumi T, Zanetti ME, Yang H, Ma K, et al. Cross-kingdom comparison of transcriptomic adjustments to low-oxygen stress highlights conserved and plant-specific responses. *Plant Physiol*. 2010;152:1484–500.
66. Zhou J, Wang X, He K, Charron J-BF, Elling AA, Deng XW. Genome-wide profiling of histone H3 lysine 9 acetylation and dimethylation in Arabidopsis reveals correlation between multiple histone marks and gene expression. *Plant Mol Biol*. 2010;72:585–95.
67. Kumar SV. H2A.Z at the Core of Transcriptional Regulation in Plants. *Mol Plant*. 2018;11:1112–4.
68. Efroni I, Han S-K, Kim HJ, Wu M-F, Steiner E, Birnbaum KD, et al. Regulation of leaf maturation by chromatin-mediated modulation of cytokinin responses. *Dev Cell*. 2013;24:438–45.
69. Kosmacz M, Parlanti S, Schwarzländer M, Kragler F, Licausi F, Van Dongen JT. The stability and nuclear localization of the transcription factor RAP2.12 are dynamically regulated by oxygen concentration. *Plant Cell Environ*. 2015;38:1094–103.
70. Zid BM, O’Shea EK. Promoter sequences direct cytoplasmic localization and translation of mRNAs during starvation in yeast. *Nature*. 2014;514:117–21.
71. Banti V, Loreti E, Novi G, Santaniello A, Alpi A, Perata P. Heat acclimation and cross-tolerance against anoxia in Arabidopsis. *Plant Cell Environ*. Wiley Online Library; 2008;31:1029–37.
72. Kwak H, Lis JT. Control of transcriptional elongation. *Annu Rev Genet*. 2013;47:483–508.
73. Ding Y, Ndamukong I, Xu Z, Lapko H, Fromm M, Avramova Z. ATX1-generated H3K4me3 is required for efficient elongation of transcription, not initiation, at ATX1-regulated genes. *PLoS Genet*. 2012;8:e1003111.
74. Weng M, Yang Y, Feng H, Pan Z, Shen W-H, Zhu Y, et al. Histone chaperone ASF1 is involved in gene transcription activation in response to heat stress in Arabidopsis thaliana. *Plant Cell Environ*. 2014;37:2128–38.

75. Fennoy SL, Nong T, Bailey-Serres J. Transcriptional and post-transcriptional processes regulate gene expression in oxygen-deprived roots of maize. *Plant J. Wiley Online Library*; 1998;15:727–35.
76. Karmodiya K, Krebs AR, Oulad-Abdelghani M, Kimura H, Tora L. H3K9 and H3K14 acetylation co-occur at many gene regulatory elements, while H3K14ac marks a subset of inactive inducible promoters in mouse embryonic stem cells. *BMC Genomics*. 2012;13:424.
77. Yang W, Wightman R, Meyerowitz EM. Cell Cycle Control by Nuclear Sequestration of CDC20 and CDH1 mRNA in Plant Stem Cells. *Mol Cell*. 2017;68:1108–19.e3.
78. Koroleva OA, Calder G, Pendle AF, Kim SH, Lewandowska D, Simpson CG, et al. Dynamic behavior of Arabidopsis eIF4A-III, putative core protein of exon junction complex: fast relocation to nucleolus and splicing speckles under hypoxia. *Plant Cell*. 2009;21:1592–606.
79. Lokdarshi A, Conner WC, McClintock C, Li T, Roberts DM. Arabidopsis CML38, a Calcium Sensor That Localizes to Ribonucleoprotein Complexes under Hypoxia Stress. *Plant Physiol*. 2016;170:1046–59.
80. Sato F, Kitajima S, Koyama T. Ethylene-induced gene expression of osmotin-like protein, a neutral isoform of tobacco PR-5, is mediated by the AGCCGCC eft-sequence. *Plant Cell Physiol. Oxford University Press*; 1996;37:249–55.
81. van Dongen JT, Licausi F. Oxygen sensing and signaling. *Annu Rev Plant Biol*. 2015;66:345–67.
82. Voesenek LACJ, Bailey-Serres J. Flooding tolerance: O<sub>2</sub> sensing and survival strategies. *Curr Opin Plant Biol*. 2013;16:647–53.
83. Licausi F, Van Dongen JT, Giuntoli B, Novi G, Santaniello A, Geigenberger P, et al. HRE1 and HRE2, two hypoxia-inducible ethylene response factors, affect anaerobic responses in Arabidopsis thaliana. *Plant J. Wiley Online Library*; 2010;62:302–15.
84. Watson JA, Watson CJ, McCann A, Baugh J. Epigenetics, the epicenter of the hypoxic response. *Epigenetics*. 2010;5:293–6.
85. LaGory EL, Giaccia AJ. The ever-expanding role of HIF in tumour and stromal biology. *Nat Cell Biol*. 2016;18:356–65.
86. Buck MJ, Raaijmakers LM, Ramakrishnan S, Wang D, Valiyaparambil S, Liu S, et al. Alterations in chromatin accessibility and DNA methylation in clear cell renal cell carcinoma. *Oncogene*. 2014;33:4961–5.
87. Chervona Y, Costa M. The control of histone methylation and gene expression by oxidative stress, hypoxia, and metals. *Free Radic Biol Med*. 2012;53:1041–7.
88. Kim S-H, Jeong J-W, Park JA, Lee J-W, Seo JH, Jung B-K, et al. Regulation of the HIF-1 $\alpha$  stability by histone deacetylases. *Oncol Rep. Spandidos Publications*; 2007;17:647–51.
89. Blais JD, Filipenko V, Bi M, Harding HP, Ron D, Koumenis C, et al. Activating transcription factor 4 is translationally regulated by hypoxic stress. *Mol Cell Biol*. 2004;24:7469–82.
90. Young RM, Wang S-J, Gordan JD, Ji X, Liebhaber SA, Simon MC. Hypoxia-mediated selective mRNA translation by an internal ribosome entry site-independent mechanism. *J Biol Chem*. 2008;283:16309–19.
91. ENCODE Project Consortium. An integrated encyclopedia of DNA elements in the human genome. *Nature*. 2012;489:57–74.
92. Schmidl C, Rendeiro AF, Sheffield NC, Bock C. ChIPmentation: fast, robust, low-input ChIP-seq for histones and transcription factors. *Nat Methods*. 2015;12:963–5.
93. Kumar R, Ichihashi Y, Kimura S, Chitwood DH, Headland LR, Peng J, et al. A High-Throughput Method for Illumina RNA-Seq Library Preparation. *Front Plant Sci*. 2012;3:202.
94. Lawrence M, Huber W, Pagès H, Aboyoun P, Carlson M, Gentleman R, et al. Software for computing and annotating genomic ranges. *PLoS Comput Biol*. 2013;9:e1003118.
95. Heinz S, Benner C, Spann N, Bertolino E, Lin YC, Laslo P, et al. Simple combinations of lineage-determining transcription factors prime cis-regulatory elements required for macrophage and B cell identities. *Mol Cell*. 2010;38:576–89.

96. Cao J, Packer JS, Ramani V, Cusanovich DA, Huynh C, Daza R, et al. Comprehensive single-cell transcriptional profiling of a multicellular organism. *Science*. 2017;357:661–7.
97. Girke T. systemPipeR: NGS workflow and report generation environment. UC Riverside <https://github.com/tgirke/systemPipeR> [Internet]. 2014; Available from: <http://www.bioconductor.org/packages/release/bioc/html/systemPipeR.html>
98. Morgan M, Carey V, Lawrence M. BiocParallel: Bioconductor facilities for parallel evaluation. R package version 0.4. 2014;1.
99. Bernd Bischl, Michel Lang, Olaf Mersmann, Jörg Rahnenführer, Claus Weihs. BatchJobs and BatchExperiments; Abstraction Mechanisms for Using R in Batch Environments. *J Stat Softw*. 2015;64:1–25.
100. McCarthy DJ, Chen Y, Smyth GK. Differential expression analysis of multifactor RNA-Seq experiments with respect to biological variation. *Nucleic Acids Res*. 2012;40:4288–97.
101. Warnes GR, Bolker B, Bonebakker L, Gentleman R, Huber W, Liaw A, et al. gplots: Various R programming tools for plotting data. R package version. 2009;2.1.
102. Wickham H. ggplot2: Elegant Graphics for Data Analysis. Springer Science & Business Media; 2009.
103. Neuwirth E. RColorBrewer: colorbrewer palettes. R package version. 2011;1.
104. Wickham H, Francois R. dplyr: A grammar of data manipulation. R package version 0.4. 2015;3.
105. Durinck S, Huber W. biomaRt: Interface to BioMart databases (eg Ensembl, COSMIC, Wormbase and Gramene). R package version. 2.
106. Yu G, Wang L-G, He Q-Y. ChIPseeker: an R/Bioconductor package for ChIP peak annotation, comparison and visualization. *Bioinformatics*. 2015;31:2382–3.
107. Lawrence M, Gentleman R, Carey V. rtracklayer: an R package for interfacing with genome browsers. *Bioinformatics*. 2009;25:1841–2.
108. Krijthe JH. Rtsne: T-distributed stochastic neighbor embedding using Barnes-Hut implementation. R package version 0.13, URL <https://github.com/jkrijthe/Rtsne>. 2015;
109. Kolde R. Pheatmap: pretty heatmaps. R package version. 2012;61.
110. Meyer D, Dimitriadou E, Hornik K, Weingessel A, Leisch F. e1071: Misc Functions of the Department of Statistics (e1071), TU Wien, 2014. R package version. 2015;1–6.
111. Maechler M. Finding Groups in Data": Cluster Analysis Extended Rousseeuw et. Documentation for software package The Comprehensive R Archive Network (CRAN): Wien [Internet]. 2018; Available from: <ftp://128.61.111.11/pub/CRAN/web/packages/cluster/cluster.pdf>
112. Morgan M, Anders S, Lawrence M, Aboyoun P, Pagès H, Gentleman R. ShortRead: a bioconductor package for input, quality assessment and exploration of high-throughput sequence data. *Bioinformatics*. 2009;25:2607–8.
113. Morgan M, Pages H, Obenchain V, Hayden N. Rsamtools: Binary alignment (BAM), FASTA, variant call (BCF), and tabix file import. R package version. 2016;1.
114. Kim D, Pertea G, Trapnell C, Pimentel H, Kelley R, Salzberg SL. TopHat2: accurate alignment of transcriptomes in the presence of insertions, deletions and gene fusions. *Genome Biol*. 2013;14:R36.
115. Gordon A, Hannon GJ. Fastx-toolkit. FASTQ/A short-reads preprocessing tools (unpublished) [http://hannonlab.cshl.edu/fastx\\_toolkit](http://hannonlab.cshl.edu/fastx_toolkit). 2010;5.
116. Andrews S, Others. FastQC: a quality control tool for high throughput sequence data. 2010;
117. Bailey TL, Boden M, Buske FA, Frith M, Grant CE, Clementi L, et al. MEME SUITE: tools for motif discovery and searching. *Nucleic Acids Res*. 2009;37:W202–8.
118. Ramírez F, Ryan DP, Grüning B, Bhardwaj V, Kilpert F, Richter AS, et al. deepTools2: a next generation web server for deep-sequencing data analysis. *Nucleic Acids Res*. 2016;44:W160–5.

119. Krzywinski M, Schein J, Birol I, Connors J, Gascoyne R, Horsman D, et al. Circos: an information aesthetic for comparative genomics. *Genome Res.* 2009;19:1639–45.
120. Quinlan AR, Hall IM. BEDTools: a flexible suite of utilities for comparing genomic features. *Bioinformatics.* 2010;26:841–2.
121. Li H. A statistical framework for SNP calling, mutation discovery, association mapping and population genetical parameter estimation from sequencing data. *Bioinformatics.* 2011;27:2987–93.
121. Li H. A statistical framework for SNP calling, mutation discovery, association mapping and population genetical parameter estimation from sequencing data. *Bioinformatics.* 2011;27:2987–93.

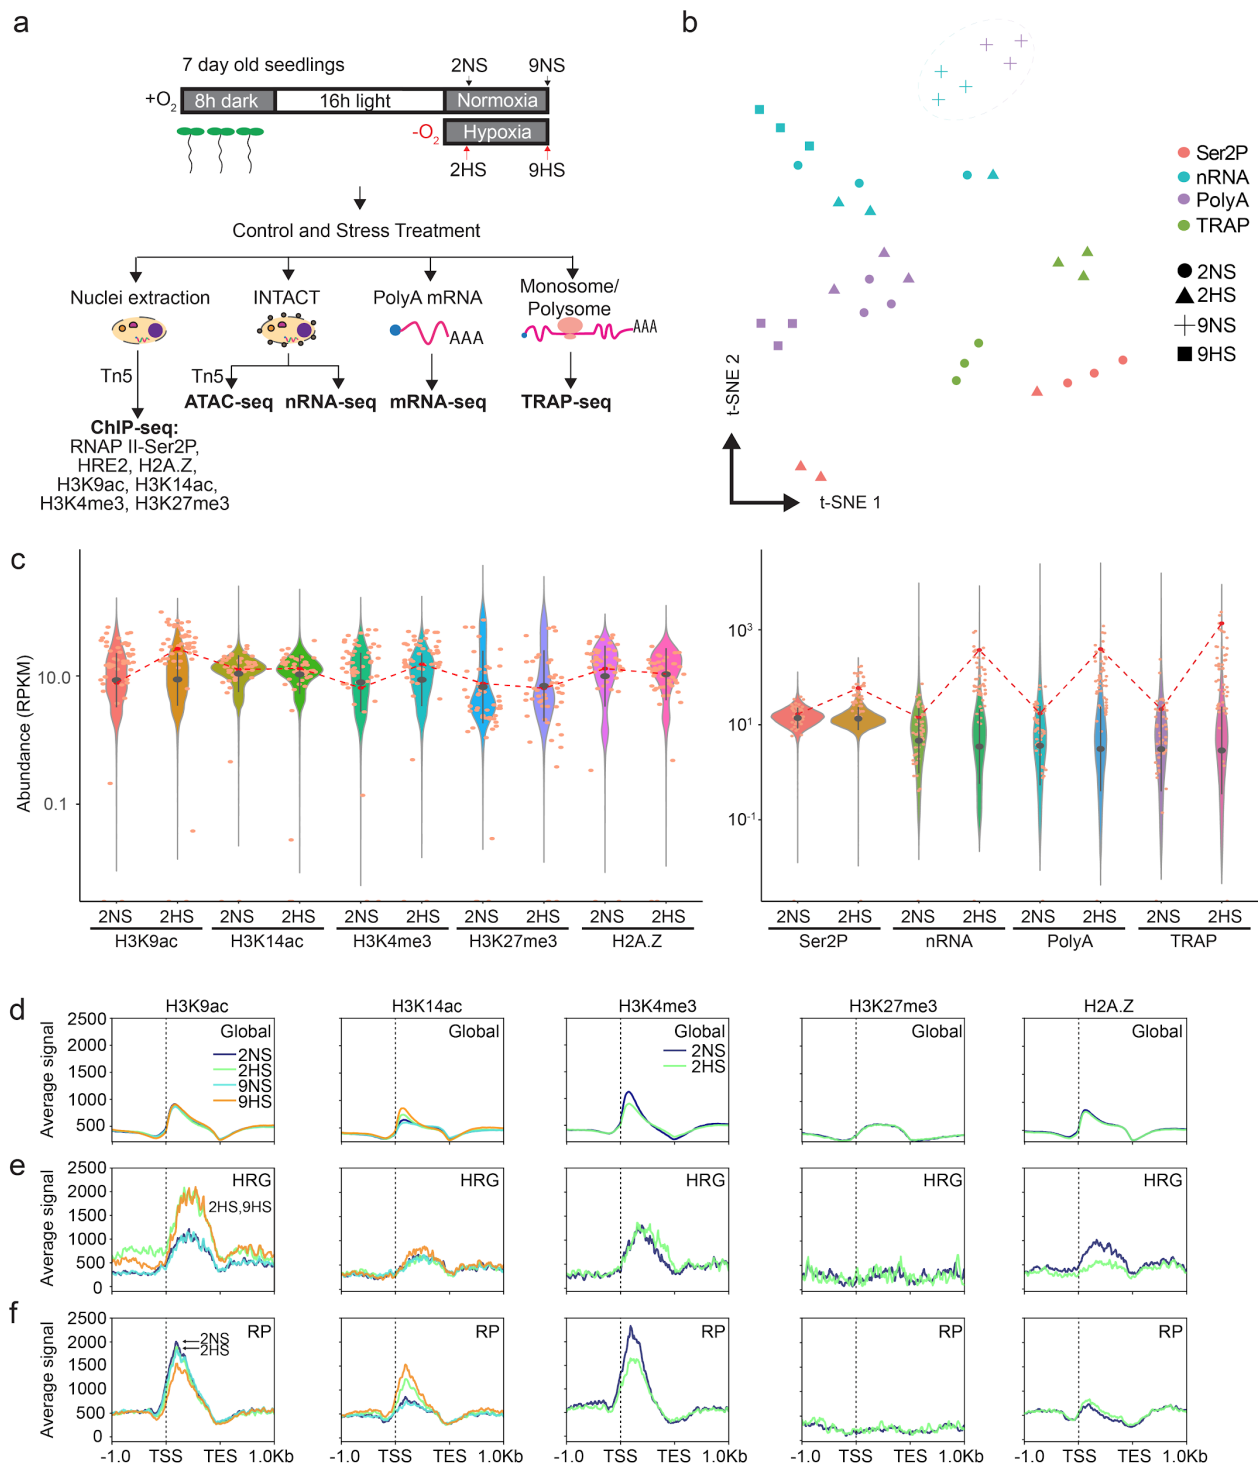

**Fig. 1 Multiscale chromatin and RNA gene regulatory analyses of control (normoxic) and hypoxic seedlings of *Arabidopsis*.** **a** Schematic of experiments performed. Seven-day-old seedlings were subjected to control (normoxic) (2NS, 9NS) or hypoxic stress (2HS, 9HS) conditions. Vertical arrows indicate time of harvest. Chromatin immunopurification (ChIP) was performed to evaluate genomic regions bound by the Ser2 phospho-isoform of RNA Polymerase II (Ser2P), the Histone 2 variant H2A.Z, modified Histone 3 (H3K4me3, H3K27me3, H3K9ac, H3K14ac), and the group VII Ethylene Responsive Factor (ERF) transcription factor HYPOXIA RESPONSIVE ERF 2 (HRE2). Isolation of Nuclei TAgged in specific Cell Types (INTACT) purified nuclei were used for Assay for Transposase Accessible Chromatin (ATAC) and evaluation of nuclear RNA. Ribosome-associated mRNA was obtained by Translating Ribosome Affinity Purification (TRAP). **b** Reproducibility of individual replicates related to nascent transcription (Ser2P) and RNA (nuclear [nRNA], polyadenylated mRNA [polyA], ribosome-associated polyA mRNA [TRAP]) by use of t-Distributed stochastic neighbor embedding (t-SNE). **c** Violin plots displaying genome-wide abundance (reads per kilobase per million reads [RPKM]) of histone and mRNA-related outputs for control (2NS) and short-term hypoxic (2HS) treatments. Mean  $\pm$  SD are depicted within violins in gray. RPKM values for the 49 core hypoxia-responsive upregulated genes (HRGs) [17] are plotted as orange dots. The HRG, *ALCOHOL DEHYDROGENASE 1 (ADH1)* is tracked as a red line. **d-f** Read distributions of histone modifications/variant genome wide **d**, for HRGs **e** and 246 cytosolic ribosomal proteins (RPs) **f**. Read distributions are plotted from 1 kb upstream to 1 kb downstream of gene units defined by the transcription start site (TSS) and transcription end site (TES). **g** Distribution of transposase hypersensitive sites (THS) on genomic features for each condition. **h-j** Average distribution of chromatin accessibility for **h** protein-coding genes, **i** HRGs, and **j** RPs determined by ATAC-seq.

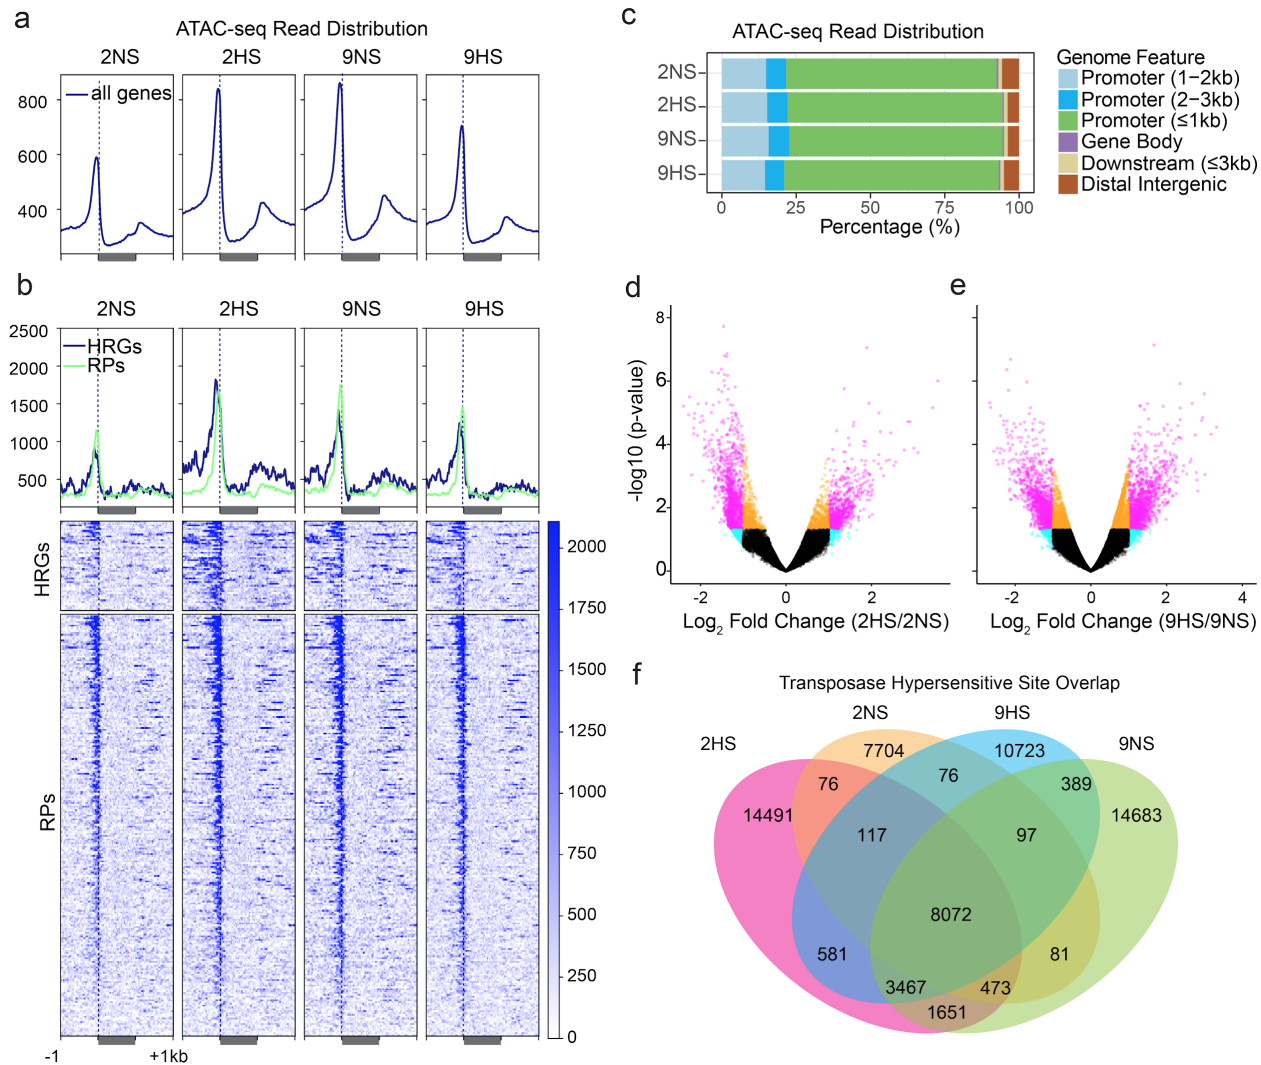

**Fig. 2 Regions of chromatin accessibility determined by Transposase-Accessible Chromatin using sequencing (ATAC-seq) are dynamically regulated by hypoxic stress.** **a-b** Average ATAC-seq read distribution of chromatin accessibility for **a** protein-coding genes, **b** HRGs, and RPs determined by ATAC-seq. **c** Distribution of transposase hypersensitive sites (THSs) on genomic features for each condition. **d-e** Volcano plot of  $\log_2$  fold change in THSs identifiable under two conditions and the significance value of their difference. Genes indicated in pink meet the criteria of  $\log_2$  fold change value  $> |1|$ ,  $0.05 < p$ . value. **f** Overlap in THSs identified for each of four conditions.



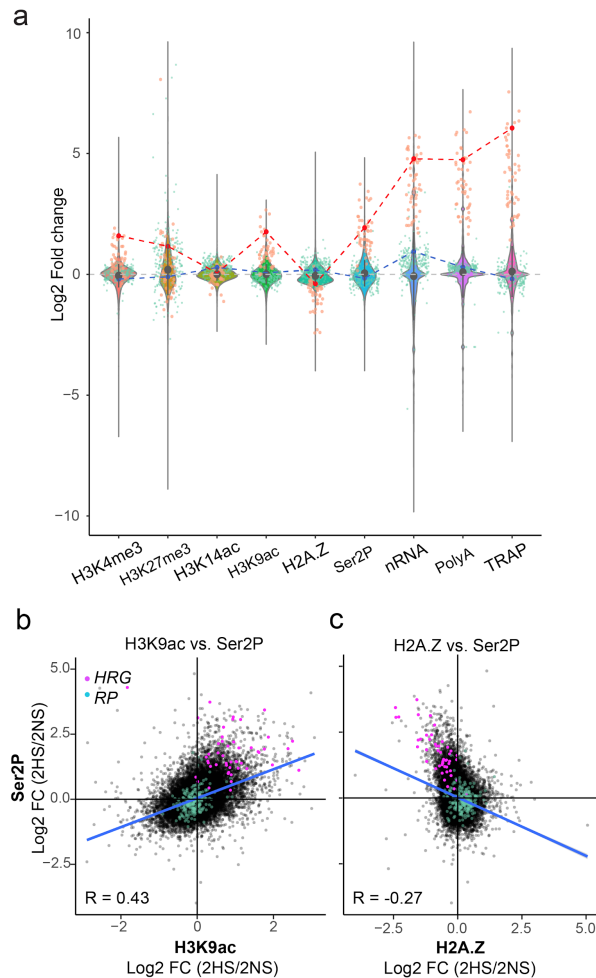

**Fig. 3 Short term hypoxic stress promotes pronounced changes in chromatin, transcription and nascent transcripts that are not uniformly reflected in transcript steady-state abundance or translation.** Comparison of genome-wide data for chromatin and RNA for 2 h hypoxic stress (2HS) relative to the normoxic control (2NS). **a** Violin plots of  $\log_2$  fold change (2HS/2NS) of histone, RNAPII-Ser2P and RNA outputs. The 49 core Hypoxia-Responsive Genes (HRGs) [17] are plotted as orange dots with *ALCOHOL DEHYDROGENASE 1 (ADH1)* depicted in red and tracked between datasets (red dashed line). Cytosolic ribosomal proteins (RPs) are plotted in blue, with *RIBOSOMAL PROTEIN 37B* tracked between datasets (blue dashed line). Mean  $\pm$  SD are depicted within violins as a dark gray dashed line **b** Comparison of  $\log_2$  fold change (2HS/2NS) between H2A.Z on the gene body and Ser2P on the gene body. **c** Comparison of  $\log_2$  fold change (FC) (2HS/2NS) between H3K9ac and Ser2P on the gene body. For b and c, HRGs are plotted in pink and RPs in blue; the Pearson's coefficient of determination is shown.

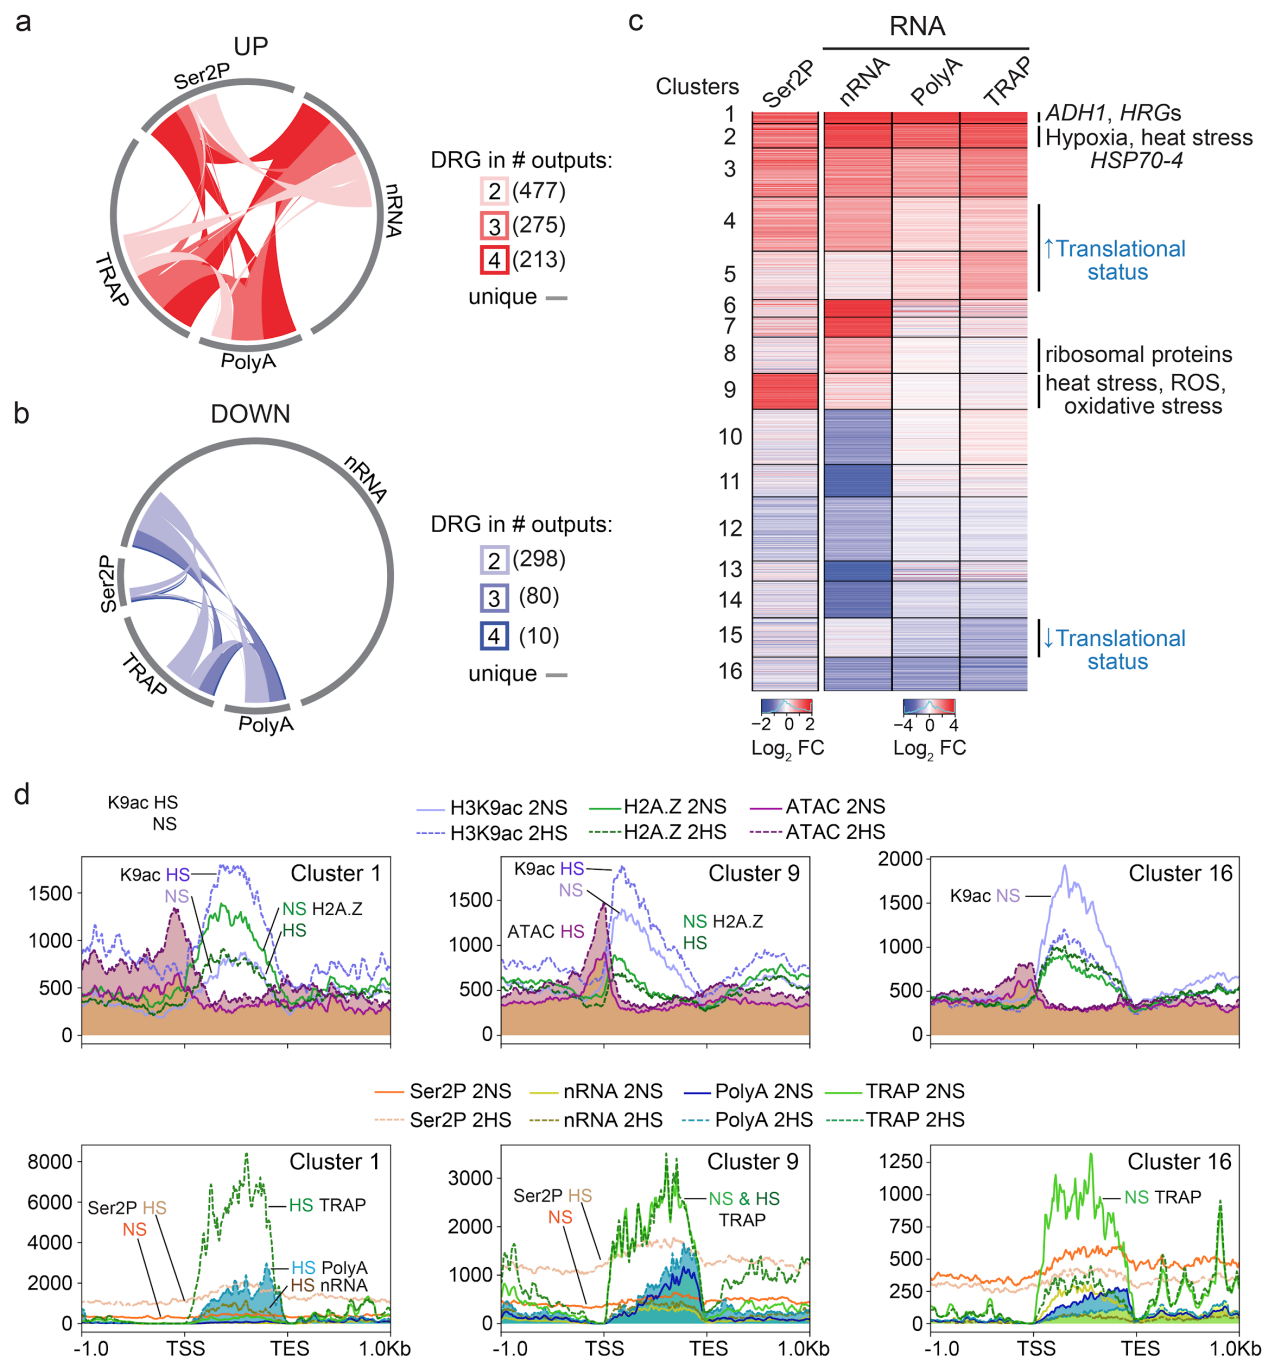

**Fig. 4 Multi-scale analysis of hypoxia-regulated genes reveals concordant and discordant patterns of gene regulation.** Number of **a** up- and **b** down-differentially regulated genes (DRGs) in response to hypoxic stress ( $|\log_2$  fold change  $> 1$ ; FDR  $< 0.05$ ) identified in each of the four readouts related to RNA: Ser2P ChIP, nRNA, polyA RNA, and TRAP RNA. Arc of circle circumference indicated by the grey line represents the DRGs in each of the four readouts. Genes differentially regulated in 2 to 4 readouts were tabulated (number in parentheses) and depicted by links within the circle. Genes differentially regulated in only one readout are represented by unlinked grey lines. **c** Heatmap showing similarly regulated genes based on four assays of gene activity. Partitioning around medoids (PAM) clustering of 3,042 differentially regulated genes; 16 clusters. Selected enriched Gene Ontology terms are shown at right (p

adj.  $< 1.47e-09$ ),  $|FC| > 1$ ,  $FDR < 0.05$ . Clusters displaying increased or decreased translational status (ribosome-associated [TRAP] relative to total abundance [polyA]) are shown. **d** Average signal of various chromatin and RNA outputs for genes of three clusters plotted from 1 kb upstream of the transcription start site (TSS) to 1 kb downstream of the transcript end site (TES) for the 2 hour (2NS, 2HS) timepoints. Signal scale of graphs differ. Dashed lines used to plot hypoxic stress data. Upper panel, ATAC-seq data shaded. Lower panel 2HS polyA data shaded.

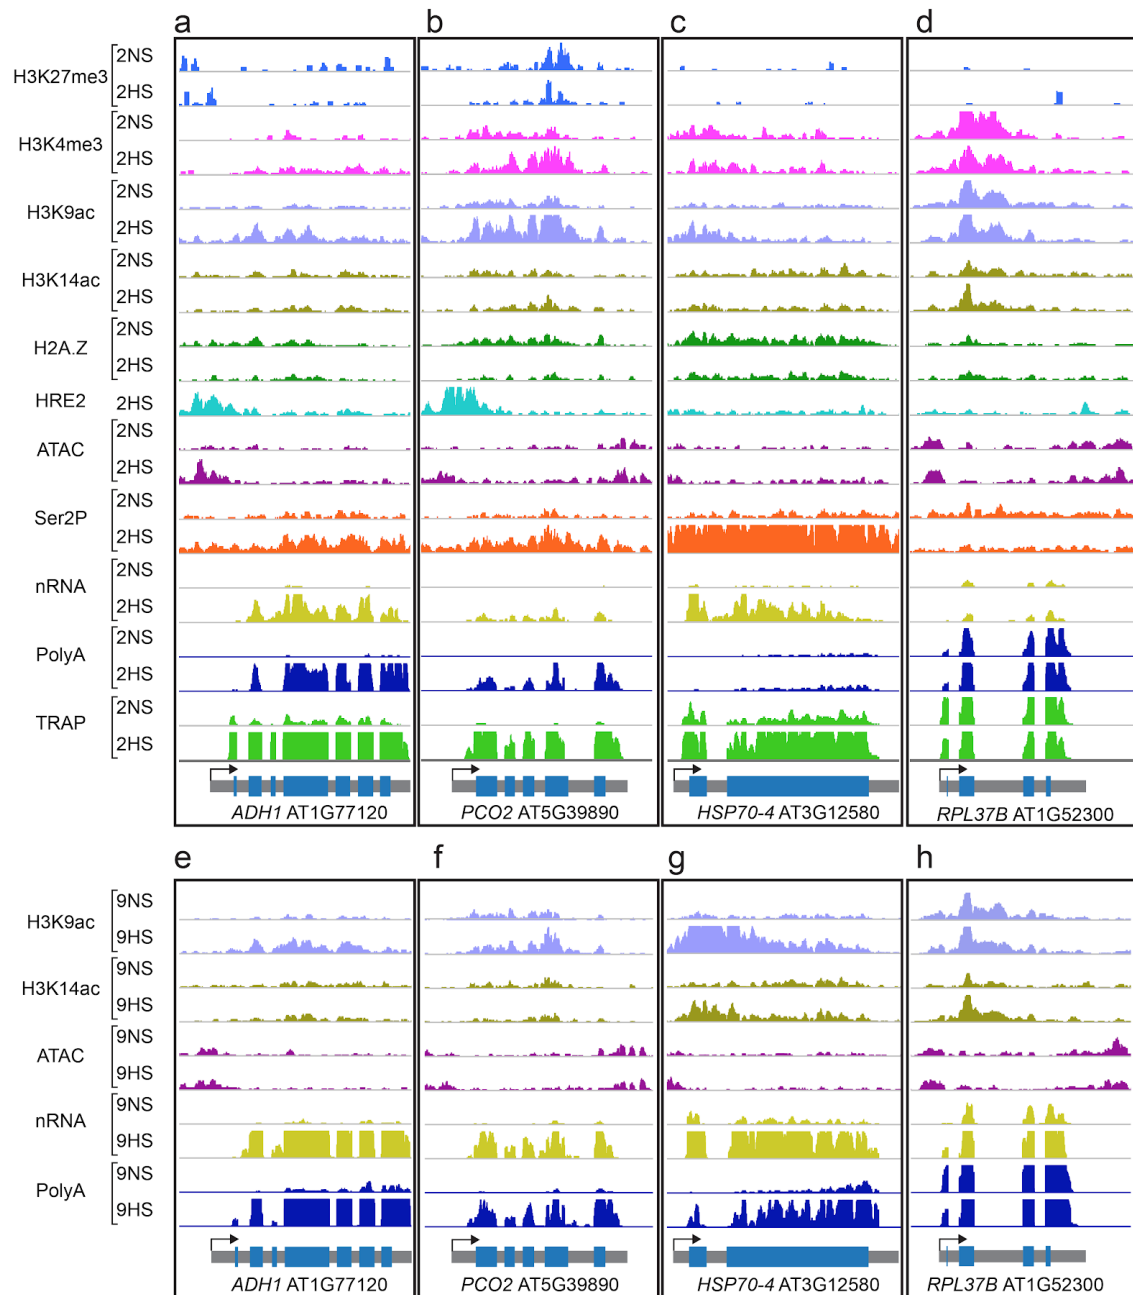

**Fig. 5. Genome browser view of normalized read coverage of histone, ATAC-seq, RNAPII-Ser2P, HRE2-chromatin immunopurification and RNA outputs for representative genes. a-d** Normoxia (2NS) and 2 h hypoxic stress (2HS). **e-h** 9NS and 9HS samples. **a,e** ALCOHOL DEHYDROGENASE 1 (*ADH1*), **b,f** PLANT CYSTEINE OXIDASE 2 (*PCO2*), **c,g** HEAT SHOCK PROTEIN 70-4 (*HSP70-4*) and **d,h** RIBOSOMAL PROTEIN L37B (*RPL37B*). The maximum read scale value used for chromatin based and RNA based outputs is equivalent for all genes depicted. At bottom, the transcription unit is shown in grey with the transcription start site marked with an arrow. *PCO2* shows a stronger decline in H2A.Z than *ADH1* in response to hypoxia at 2HS (*PCO2*, -1.15 log<sub>2</sub> FC; *ADH1*, -0.33 log<sub>2</sub> FC) and demonstrates an example of elevated H3K4me3 under hypoxic stress.

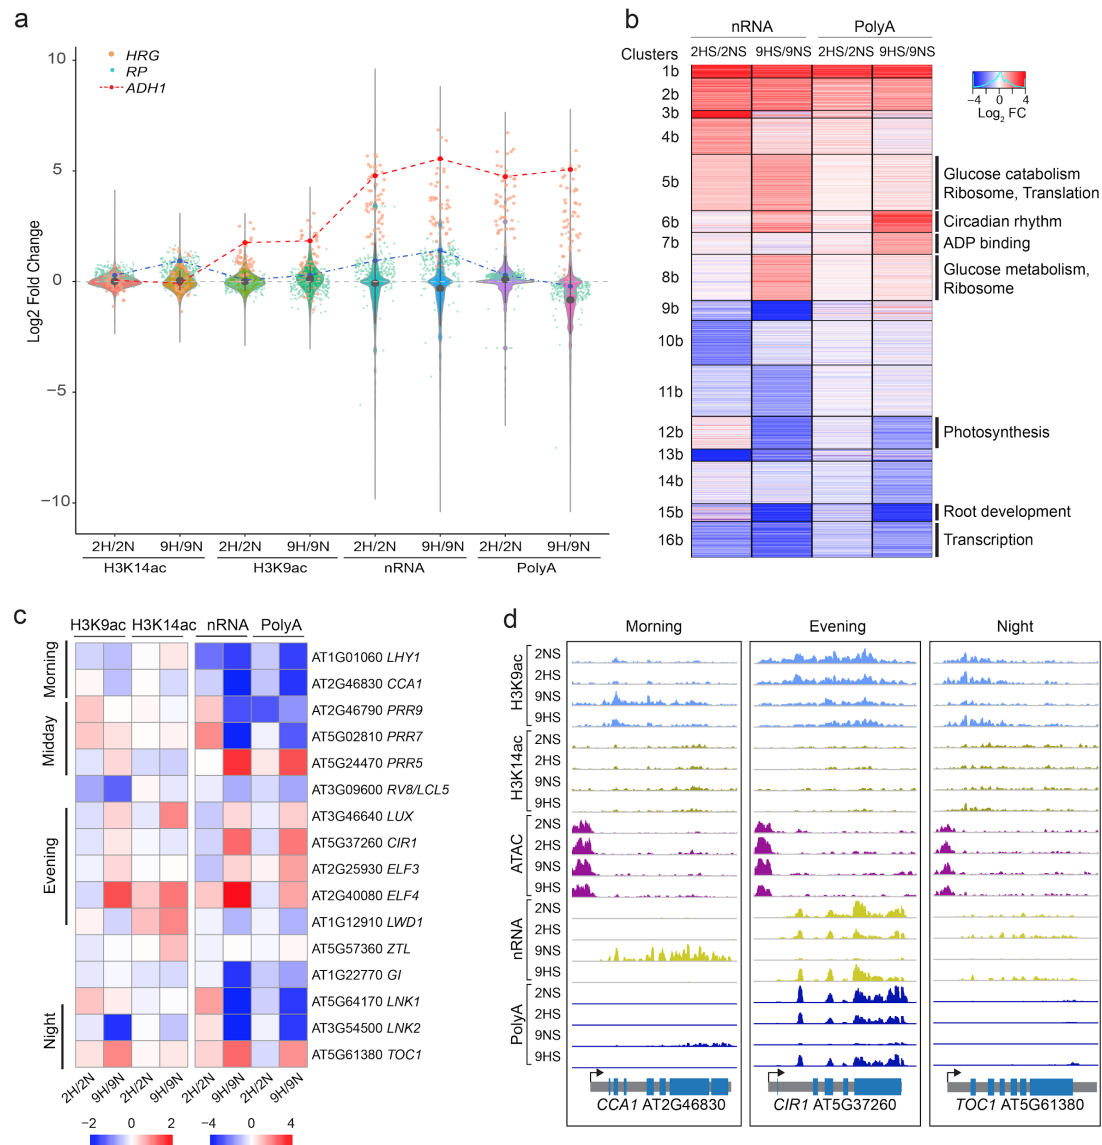

**Fig. 6. Prolonged hypoxia leads to further variation in epigenetic, transcriptional and posttranscriptional regulation.** **a** Violin plots comparing  $\log_2$  fold change of two histone and two mRNA outputs at the 2h (2HS/2NS) and 9h timepoints (9HS/9NS) as plotted in Figure 1b. The HRGs are plotted as orange dots with ADH1 depicted in red and tracked between datasets (red dashed line). RPs are plotted in blue, with RIBOSOMAL PROTEIN 37B. Mean  $\pm$  SD depicted within violins as a dark gray dashed line. **b** Heatmap showing similarly regulated genes based on two RNA readouts. Partitioning around medoids (PAM) clustering of 3,897 differentially regulated genes; 16 clusters. Selected enriched Gene Ontology terms are shown at right ( $p$  adj.  $<$  1.37E-06),  $|FC| >$  1, FDR  $<$  0.05. **c** Heatmap of chromatin and RNA readouts of select circadian regulated genes under short and prolonged hypoxic stress. Heatmap scales between chromatin and RNA based readouts differ. **d** Browser views of a morning (CIRCADIAN CLOCK ASSOCIATED 1, CCA1), evening (CIRCADIAN 1, CIR1), and night (TIMING OF CAB EXPRESSION 1, TOC1) expressed genes. RNA scale of TOC1 is three-fold lower than the scale used for CCA1 and CIR1 due to low transcript abundance.

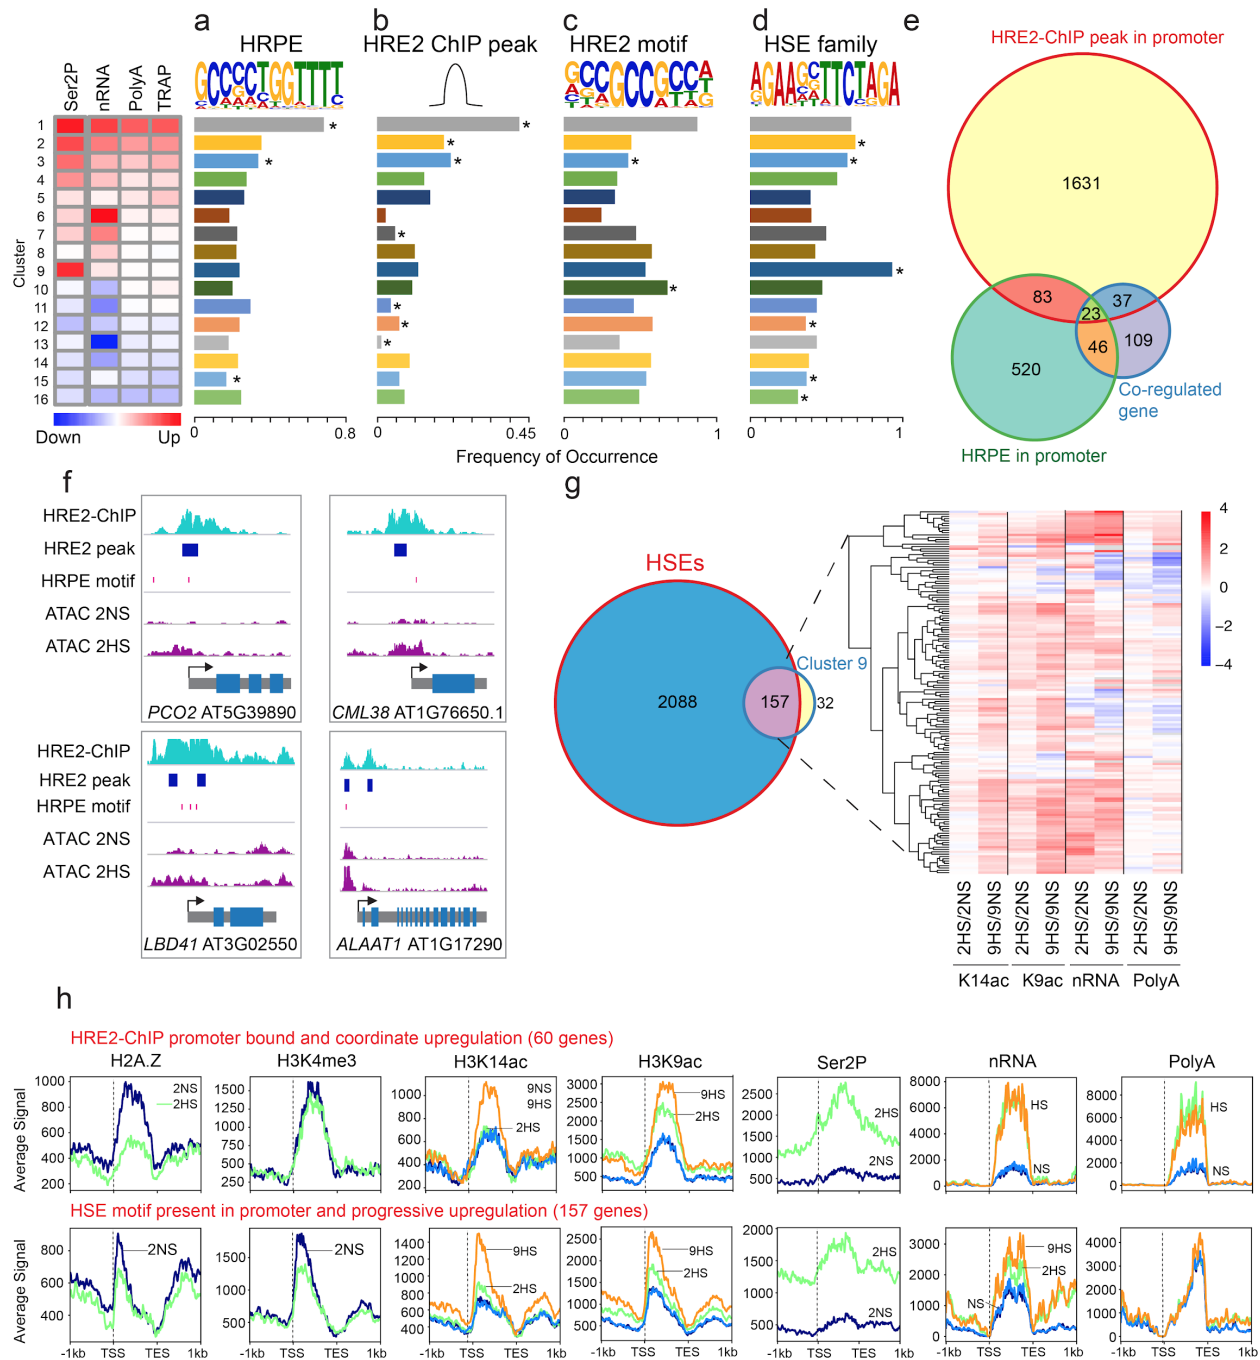

**Fig. 7. Regulation of hypoxic responses by two ERFVII and HSF TF families.** **a-d** Motif and peak enrichment in the promoter regions (1 kb upstream to 500 bp downstream of the TSS) of genes in clusters identified in Fig. 4c for **a**. Hypoxia Responsive Promoter Element (HRPE), **b**. HRE2-ChIP peaks, **c** HRE2-motif, and **d**. Heat Shock sequence Elements (HSE). Frequency of motif and peak occurrence was calculated as # motifs per # genes in cluster. Clusters with significant enrichment were identified by two-tailed Fisher's exact test  $p < 0.05$ . **e**. Overlap of genes containing HRE2-ChIP peaks and HRPE within promoter regions and the coordinately upregulated genes. **f**. Genome browser view of select HRGs (*PLANT CYSTEINE OXIDASE2*, *PCO2*; *CALMODULIN-LIKE 38*, *CML38*; *LOB-DOMAIN CONTAINING PROTEIN 41*, *LBD41*; *ALANINE AMINO TRANSFERASE1*, *AAT1*). The locations of

HRE2-ChIP peaks and HRPEs are depicted as a horizontal blue box and vertical red line, respectively.

**g.** Venn diagram of DRGs containing promoter HSEs and cluster 9 genes in Fig. 4c. Heatmap of  $\log_2$  FC values for H3K14ac, H3K9ac, nRNA, and polyA RNA for 2HS/2NS and 9HS/9NS is depicted for the union of genes. **h,i** Average signal of chromatin and RNA readouts for **h**, HRE2 bound genes with coordinate upregulation and **i**, genes with progressive upregulation (cluster 9) containing promoter HSEs. Average signal is plotted from 1 kb upstream of the transcription start site (TSS) to 1 kb downstream of the transcript end site (TES).

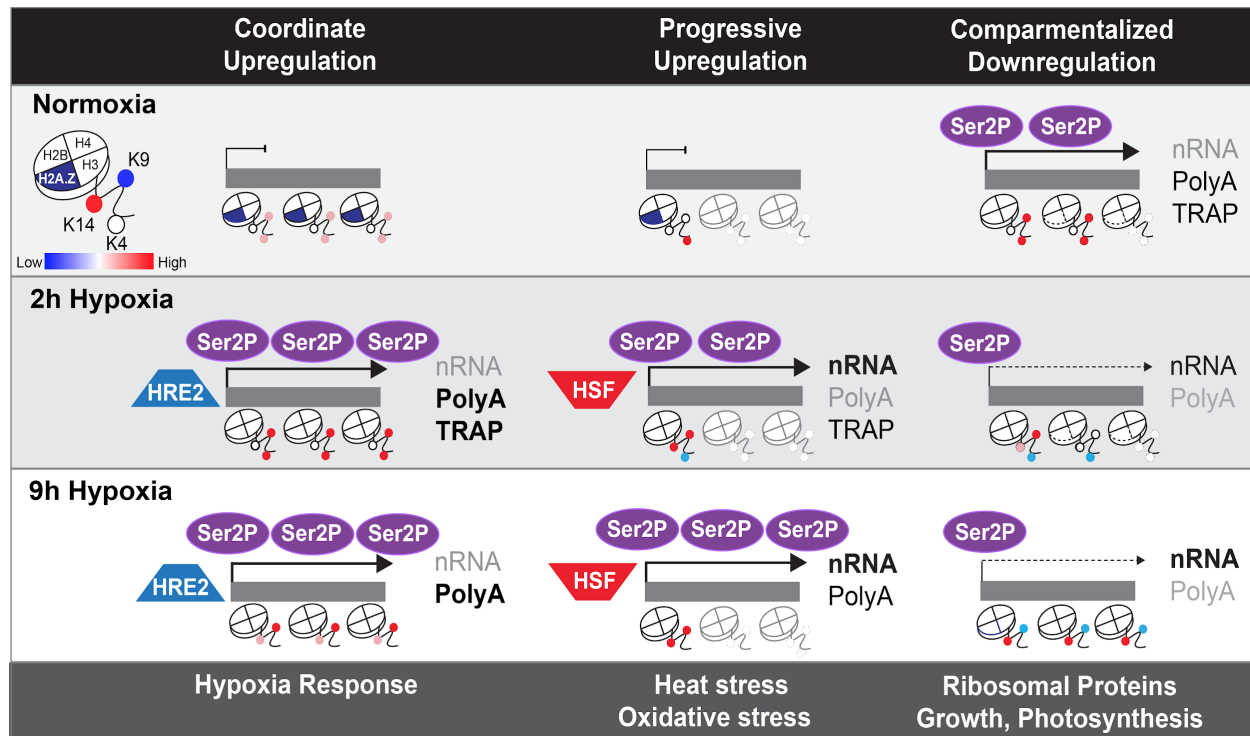

**Fig. 8. Model of four dominant patterns of nuclear regulation in response to short term and prolonged hypoxic stress.** Genes with coordinate upregulation from chromatin to translation, many of which are bound by the transcription factor HRE2, are characterized by H2A.Z eviction, H3K4me3, H3K9ac. Genes with progressive upregulation include many associated with heat and oxidative stress responses. These are lowly transcribed under normoxia (nonstress conditions); their transcription increases in response to brief hypoxia (2h hypoxia) as shown by high association with RNAPII-Ser2P and elevation of nuclear transcripts (nRNA), some of which are incompletely spliced. Although polyadenylated (polyA) transcripts of these genes are low abundance and primarily 3' biased, they are typically associated with ribosomes (TRAP). Progressively upregulated genes have strong 5' bias in histone marks, hypoxia-triggered H2A.Z eviction, H3K9ac elevation and H3K4me3 reduction. Many are targets of HSFs. Genes with compartmentalized downregulation include many associated with growth and photosynthesis. Maintained Ser2P and nRNA levels under the stress indicate these continue to be transcribed, acquire greater H3K14ac and sustain H3K9ac. Cartoons illustrates histone modifications as defined by the key. Transcript abundance ranges from limited (grey) to abundant (black, bold). HRE2, Hypoxia-Responsive ERF 2; HSF, Heat Shock Factor transcriptional activator; Ser2P, RNAPII with the Ser2P modification.



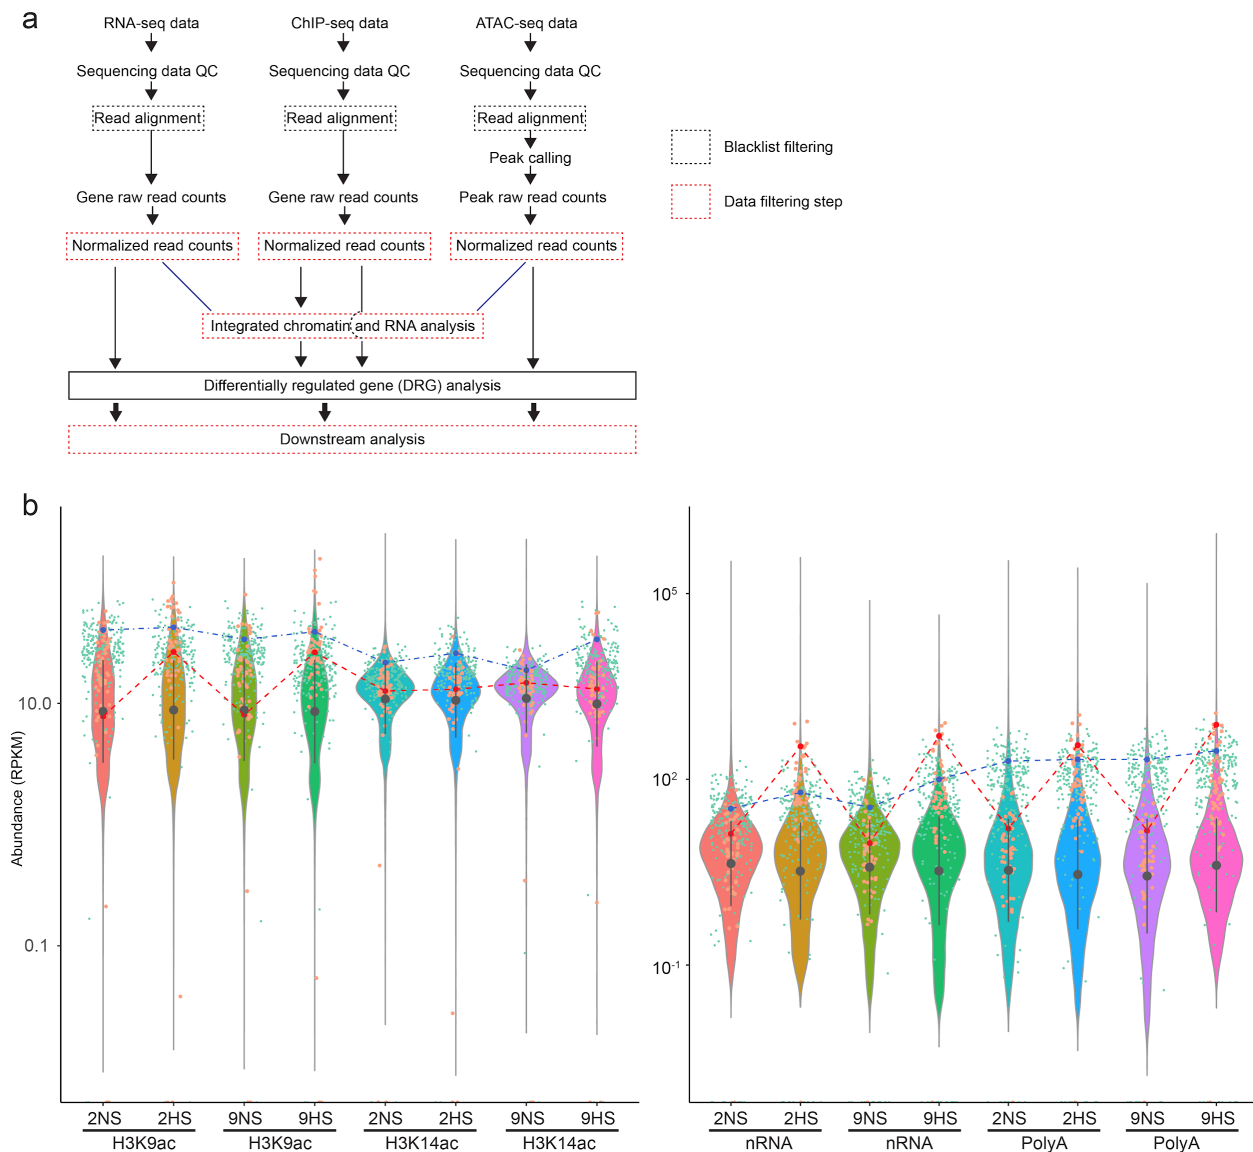

**Figure S1. Expanded overview of the multiscale chromatin and RNA gene regulatory analyses.** **a** Schematic of library types and data analysis performed on 7-day-old seedlings subjected to control (normoxic) (2NS, 9NS) or hypoxic stress (2HS, 9HS) as shown in Fig 1a. Control seedlings were compared to hypoxia stress seedlings independently within each chromatin- and RNA-based dataset. Low abundance reads were filtered ( $< 2$  CPM). Differentially regulated genes were identified and utilized for downstream analyses. The chromatin and RNA datasets were also analyzed in combination. **b** Violin plots comparing distribution of genome-wide abundance (reads per kilobase per million reads [RPKM]) of histone and mRNA-related outputs for control (2NS, 9NS) and hypoxic (2HS, 9HS) treatments for all readouts assayed at 9HS. RPKM values for the 49 core hypoxia responsive upregulated genes (HRGs) [17] are plotted as orange dots. The HRG, *ALCOHOL DEHYDROGENASE 1 (ADH1)* is tracked as a red line. RPKM values for cytosolic ribosomal proteins (RPs) are plotted in blue, with *RIBOSOMAL PROTEIN 37B* tracked between datasets (blue dashed line). Mean  $\pm$  SD are depicted within violins as a dark gray dashed line.

**Figure S2 (on two pages)**

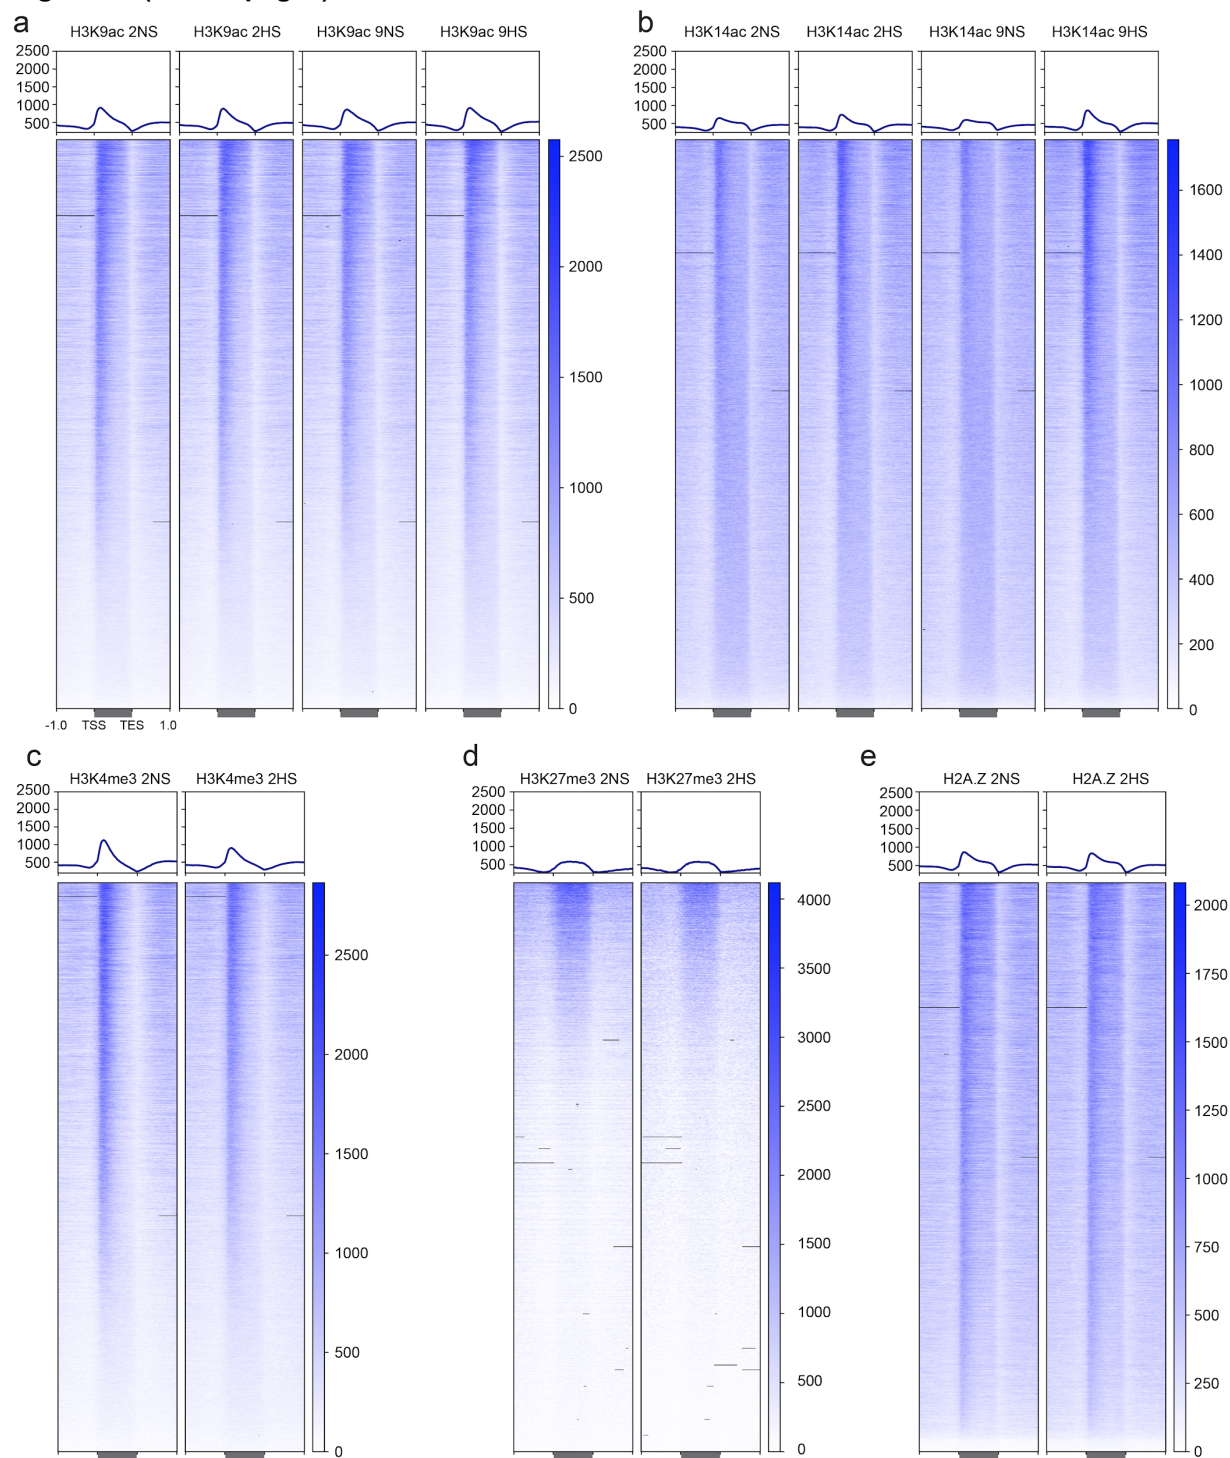

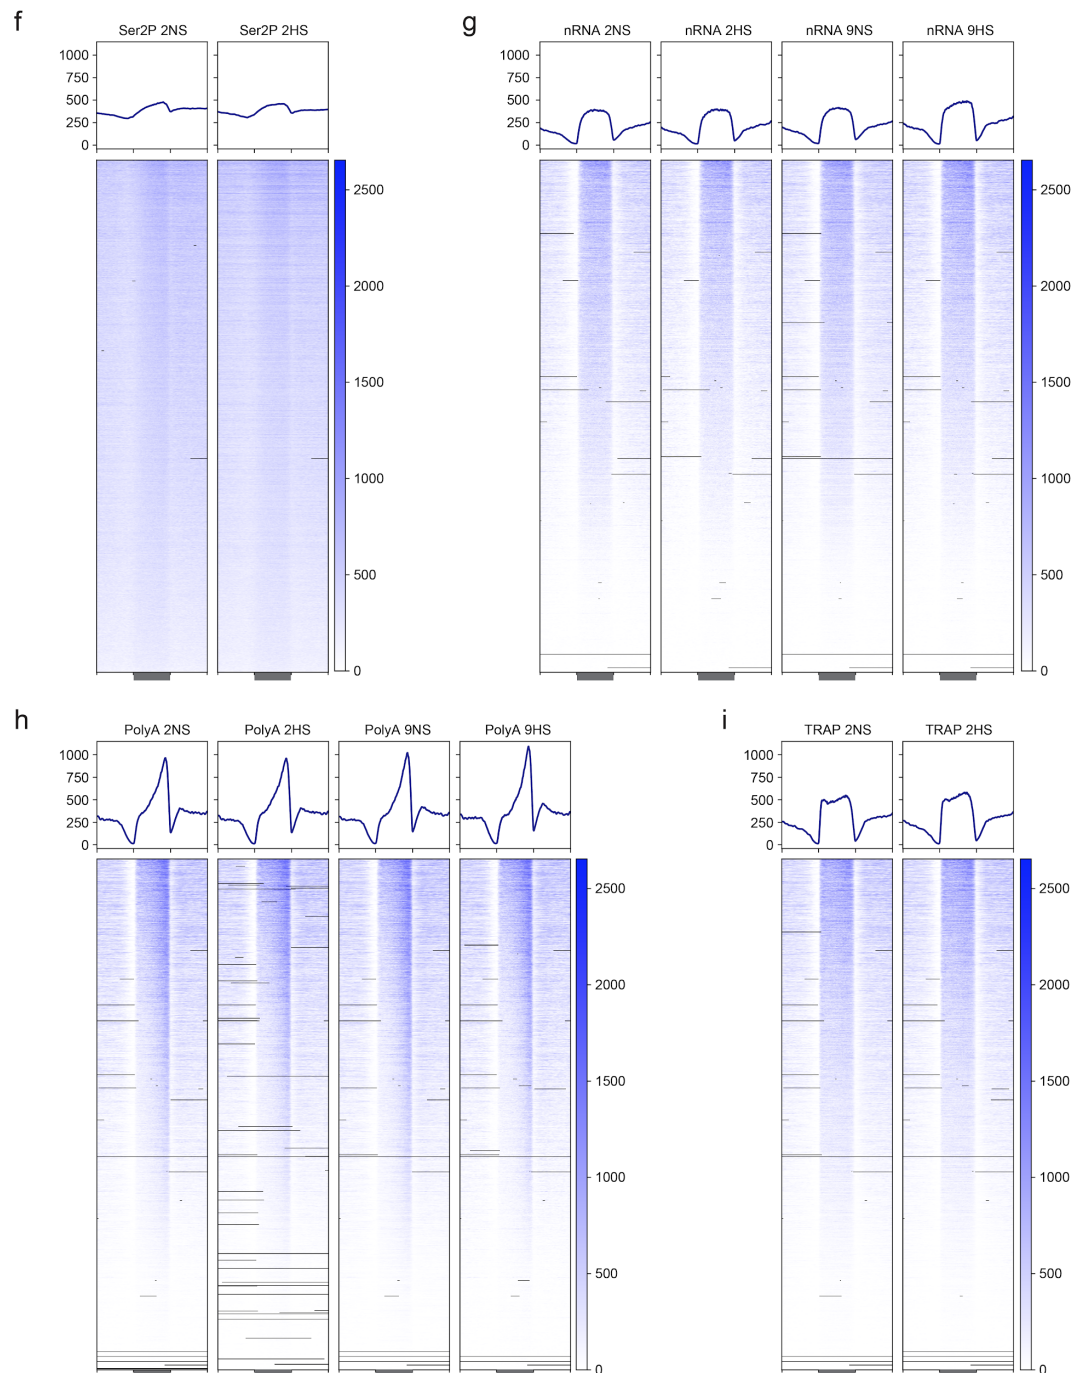

**Figure S2. Average signal plots and heat maps for the global distribution of reads of chromatin and RNA data.** a-h The genomic region from 1 kb upstream of the transcription start site (TSS) to 1 kb downstream of the transcription end site (TES) is depicted for each histone modification and variant, RNAPII-Ser2P (Ser2P), nuclear RNA (nRNA), polyadenylated RNA (polyA RNA) and ribosome-associated RNA (TRAP RNA) for nonstress (2NS, 9NS) and hypoxia (2HS, 9HS) stressed seedlings. Each heat map ranks genes from the highest signal (top) to the lowest (bottom). Heatmap intensity scale values differ between plots of different readouts and are shown. Blacklisted regions of the genome with disproportionately high reads are tabulated in Table S5 and depicted as a black line.

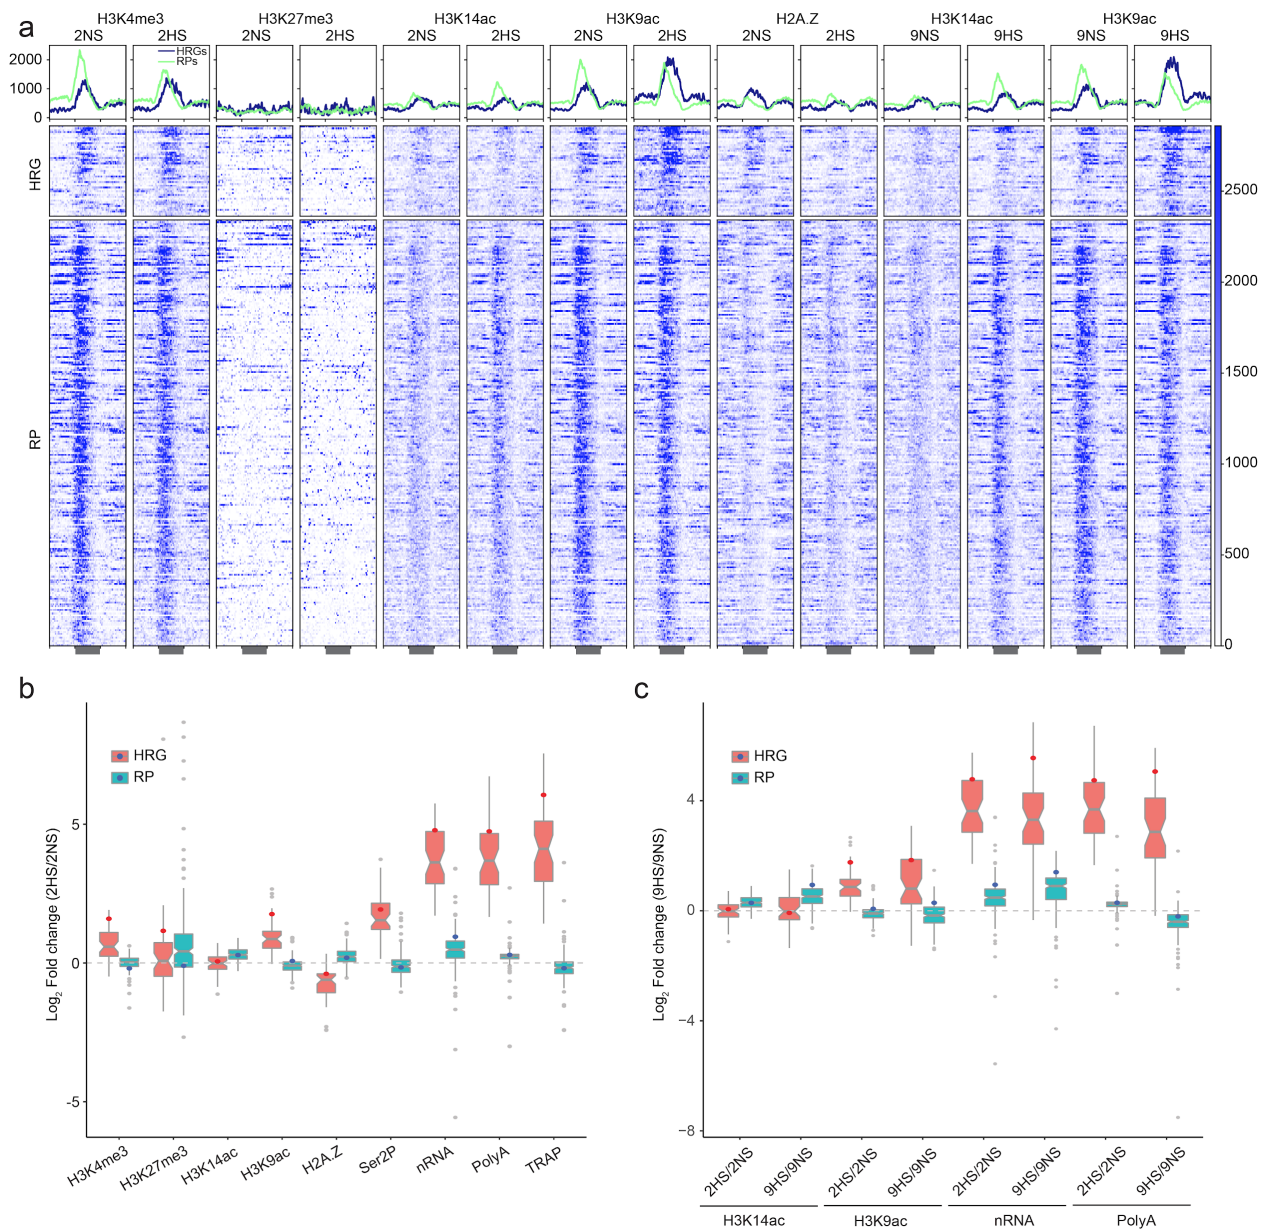

**Figure S3. Multi-level evaluation of histone and gene regulation activity of the *HRGs* and *RPs*.** **a** The average signal profile and read distribution heatmap for *HRGs* (blue) and *RPs* (green) is depicted for each histone dataset and condition. Analysis of the hypoxia responsive genes (*HRGs*) (n=49) and cytosolic ribosomal protein genes (n=223). Each row in the heat map represents an individual gene; gene order is the same in all plots. **b,c** Box plots of log<sub>2</sub> fold change assayed for **(b)** short (2 h) and **(c)** prolonged (9 h) hypoxic stress compared to control (2HS/2NS, 9HS/9NS). Data for *ADH1* is indicated as a red dot and that of *RPL37B* is indicated as a blue dot. Range of dataset and upper and lower quantiles are depicted within each boxplot.

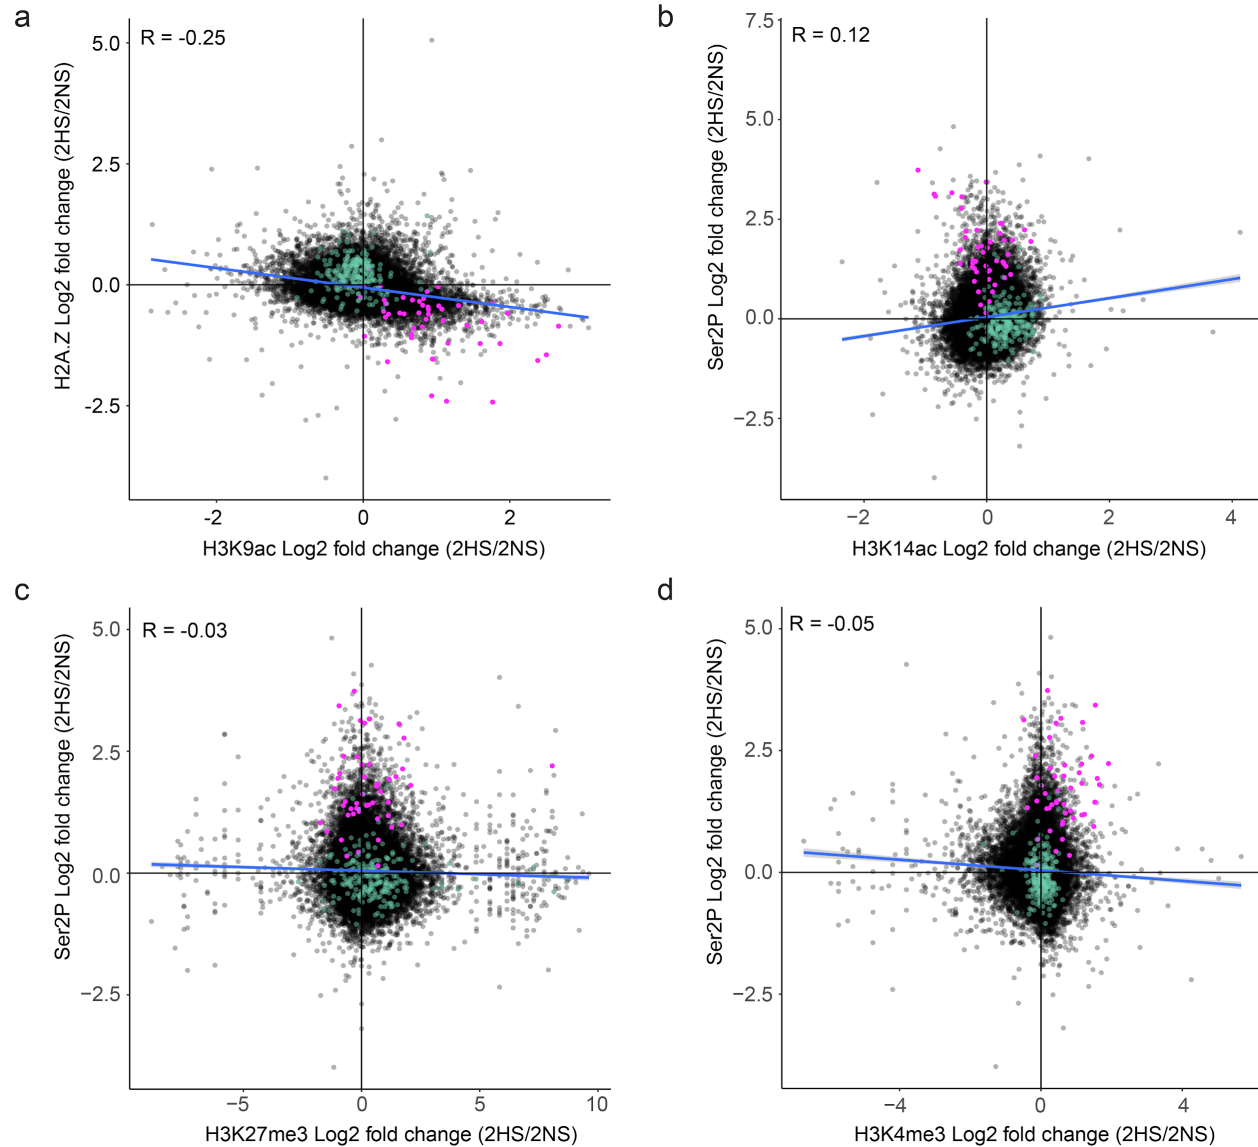

**Figure S4. Evidence of cooperative association between H2A.Z eviction and H3K9ac and the relation between Histone H3 modification and RNAPII engagement.** Plots comparing genome-wide changes in histone modifications and RNAP-Ser2P on individual gene bodies in response to hypoxia. **a** Comparison of log<sub>2</sub> fold change (2HS/2NS) values of H3K9ac and H2A.Z association on gene bodies. **b-d** Comparison of log<sub>2</sub> fold change (2HS/2NS) values of **(b)** H3K14ac, **(c)** H3K27me3, and **(d)** H3K4me3 and Ser2P on gene bodies. In all panels, HRGs are plotted in pink and RPs in green; the Pearson correlation coefficient for all genes is shown and the slope depicted with a blue line.

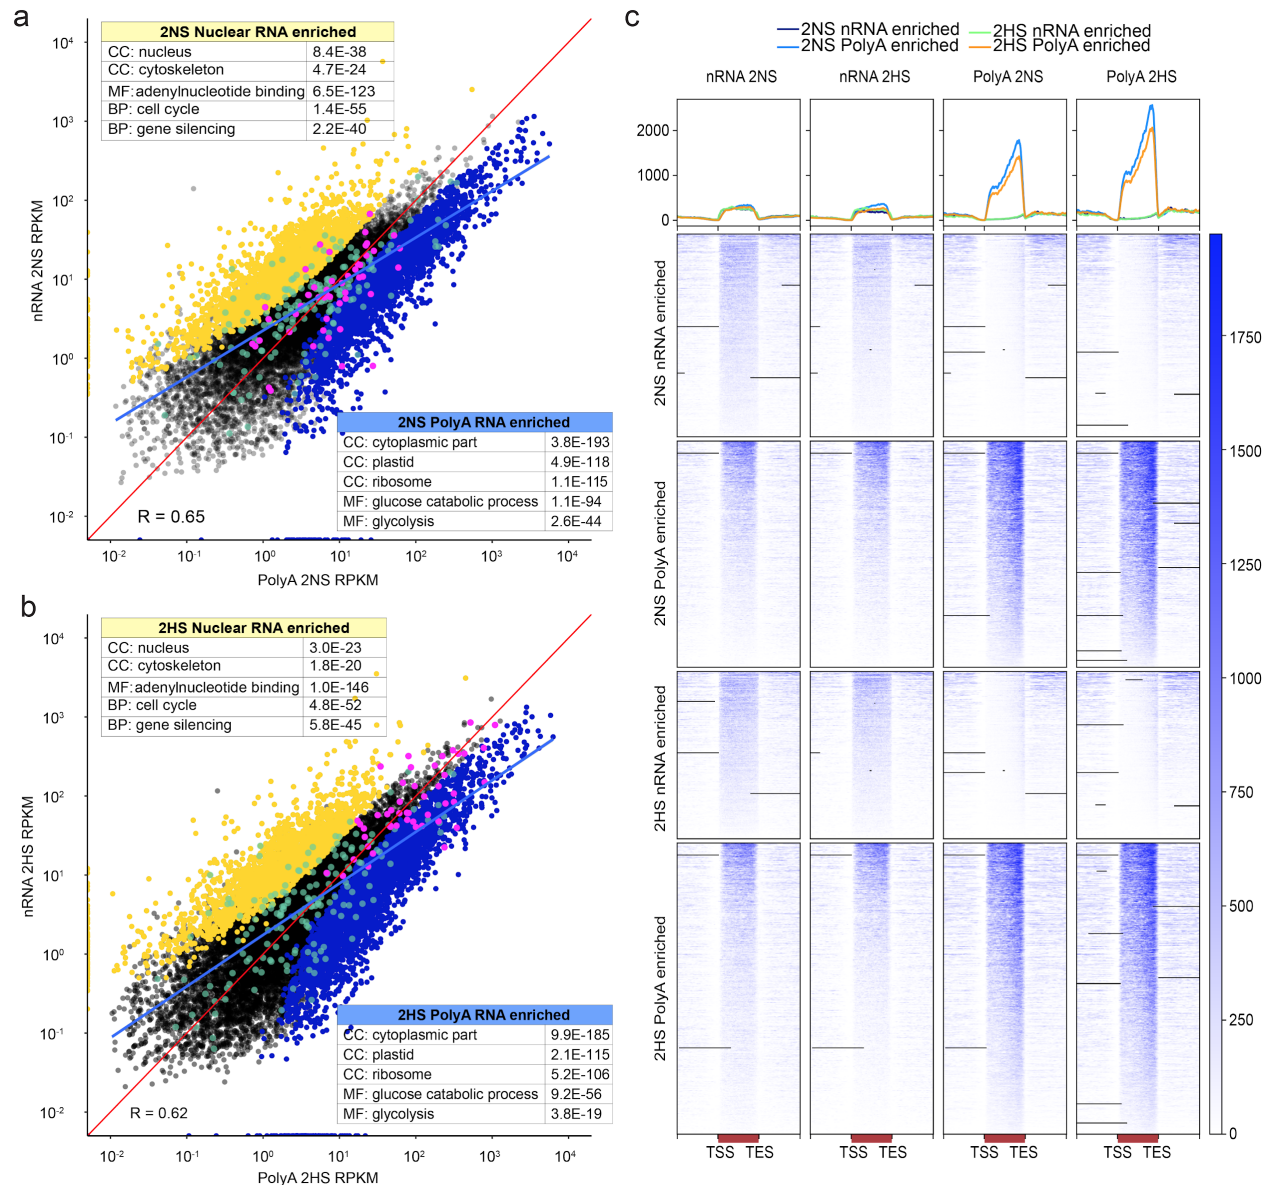

**Figure S5. Genome-wide comparison of nRNA to polyA RNA demonstrates nuclear and cytoplasmic enrichment of transcripts under two conditions. a, b** Scatterplot of normalized read values (per kilobase per million reads; RPKM) on genes in nRNA and polyA RNA populations at **(a)** 2NS and **(b)** 2HS. Transcripts enriched in nRNA (yellow; 2NS: 2,855, 2HS: 2,377) or polyA RNA (blue; 2NS: 3,139, 2HS: 4,029) are depicted ( $|\log_2 FC| > 1$ ,  $p < 0.05$ ). *HRGs* and *RPs* are also indicated in pink and green, respectively. The genome-wide Pearson correlation coefficient is shown and the slope depicted with a blue line. The red line is a slope of 1. Inserted tables describe representative Gene Ontology categories that are over-represented in nuclear RNA and polyA under the two conditions (data from [Table S2](#)). Many of the same groups of cell component (CC) and molecular (MF) were over-represented in the nRNA and polyA RNA populations obtained in the same manner in rice [46]. **c** Average signal profile and read distribution heatmap of nRNA-enriched and polyA-enriched transcripts at 2NS and 2HS.

**Figure S6 (on two pages)**

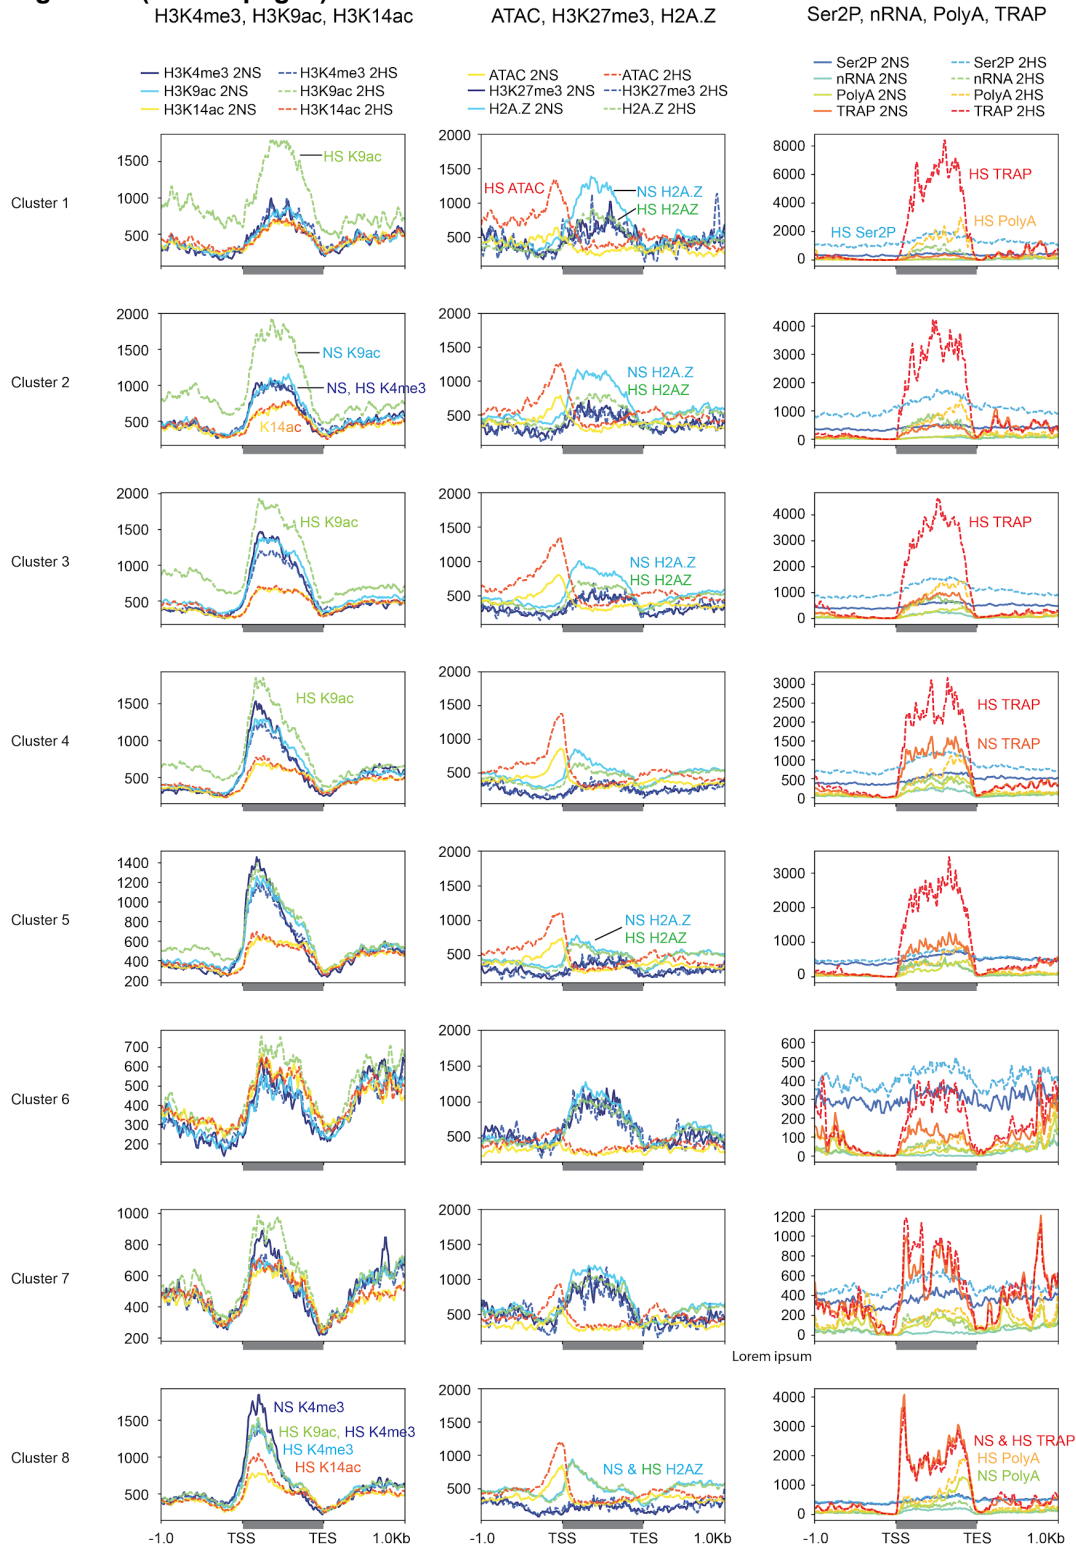

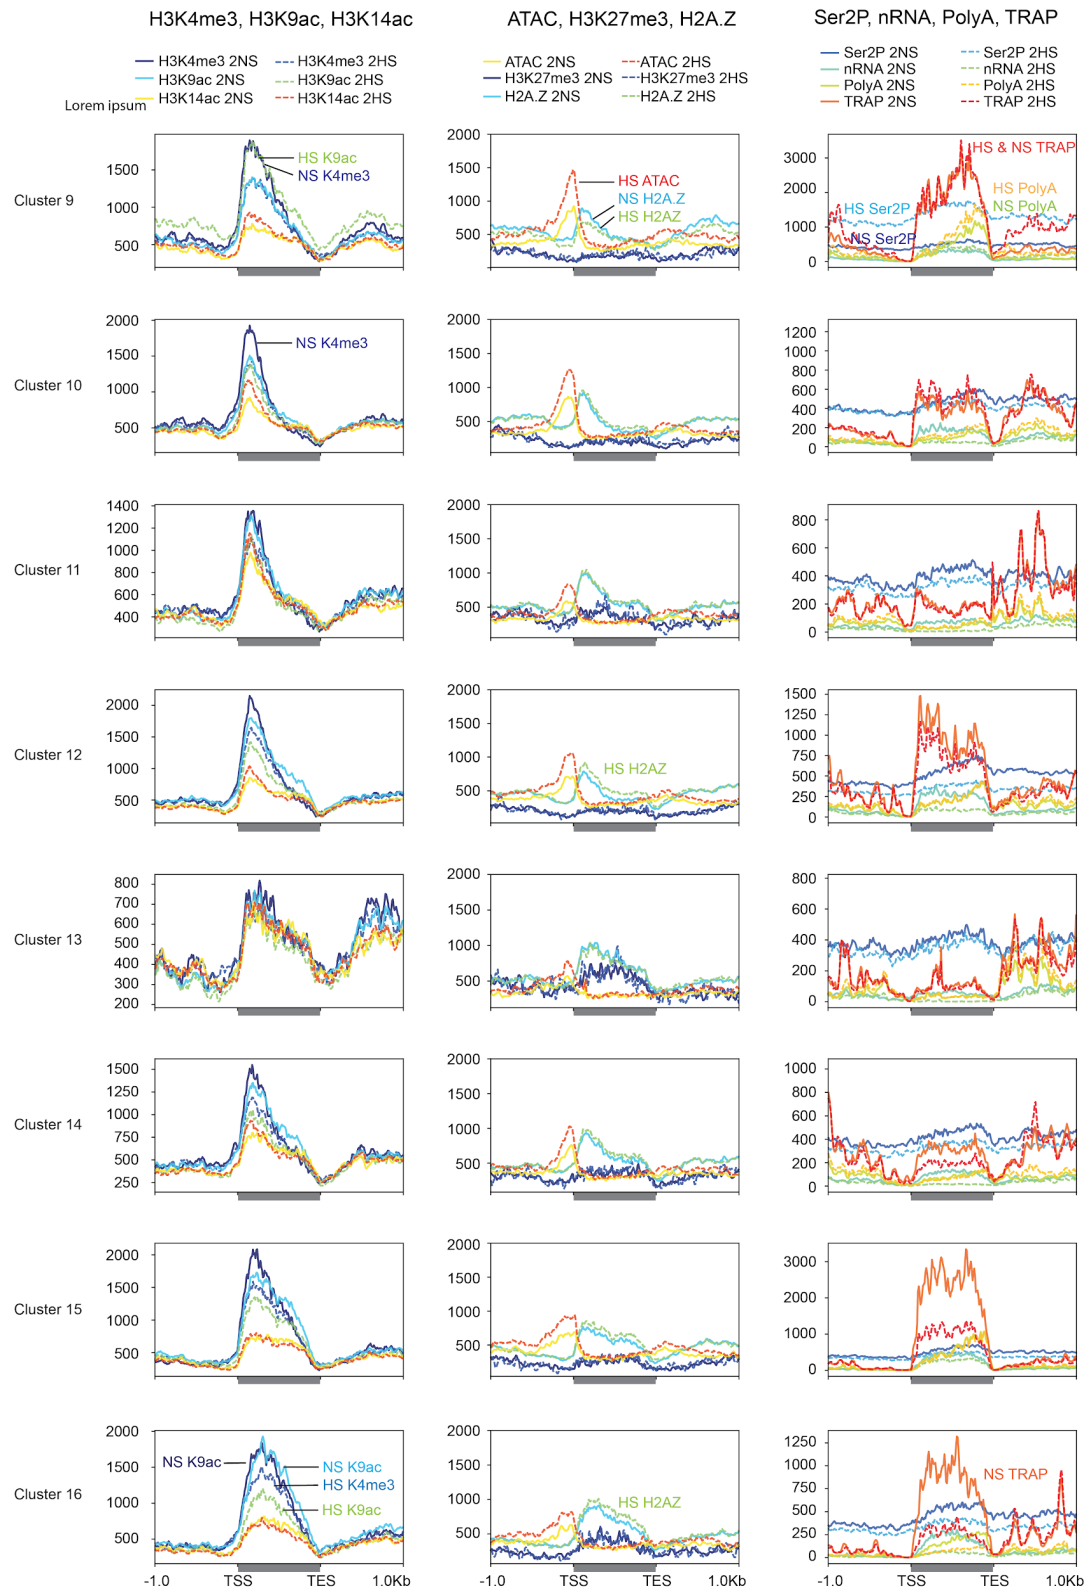

**Figure S6. Distinctions in histones, RNAPII-Ser2P and RNA levels on genes that are co-regulated in response to hypoxic stress.** Average signal of chromatin and RNA outputs for clustered genes identified from the 2HS comparison in Fig. 4c. Hypoxic sample data are dashed lines. Signal values are plotted from 1 kb upstream of the TSS to 1 kb downstream of the TES. Signal scale of graphs may differ.



**Figure S7 (on two pages)**

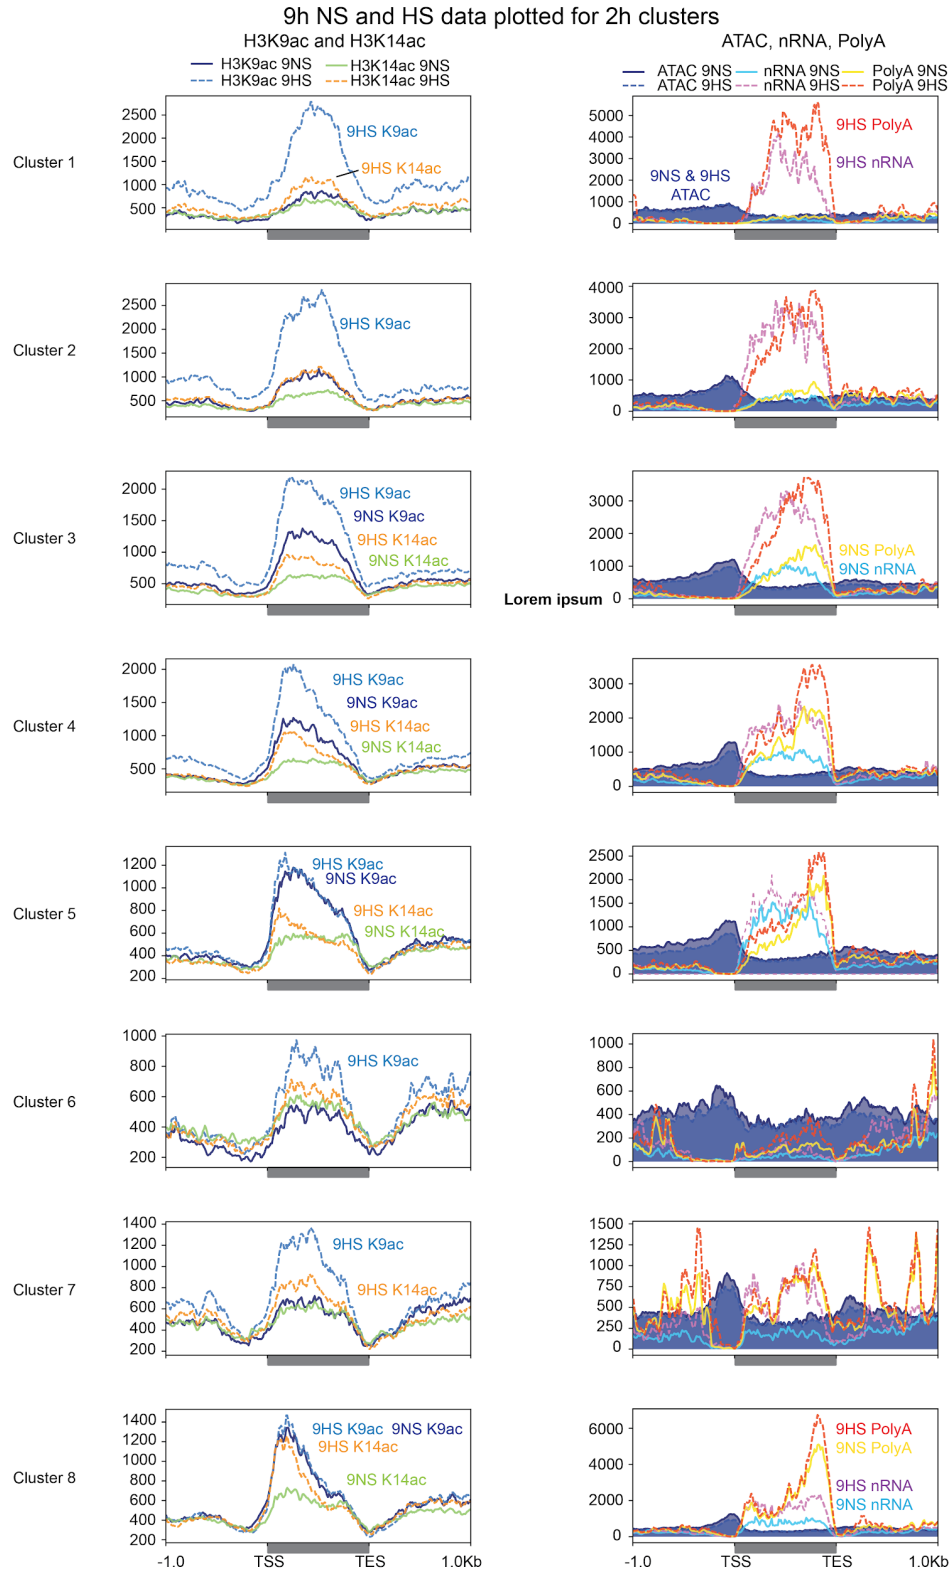

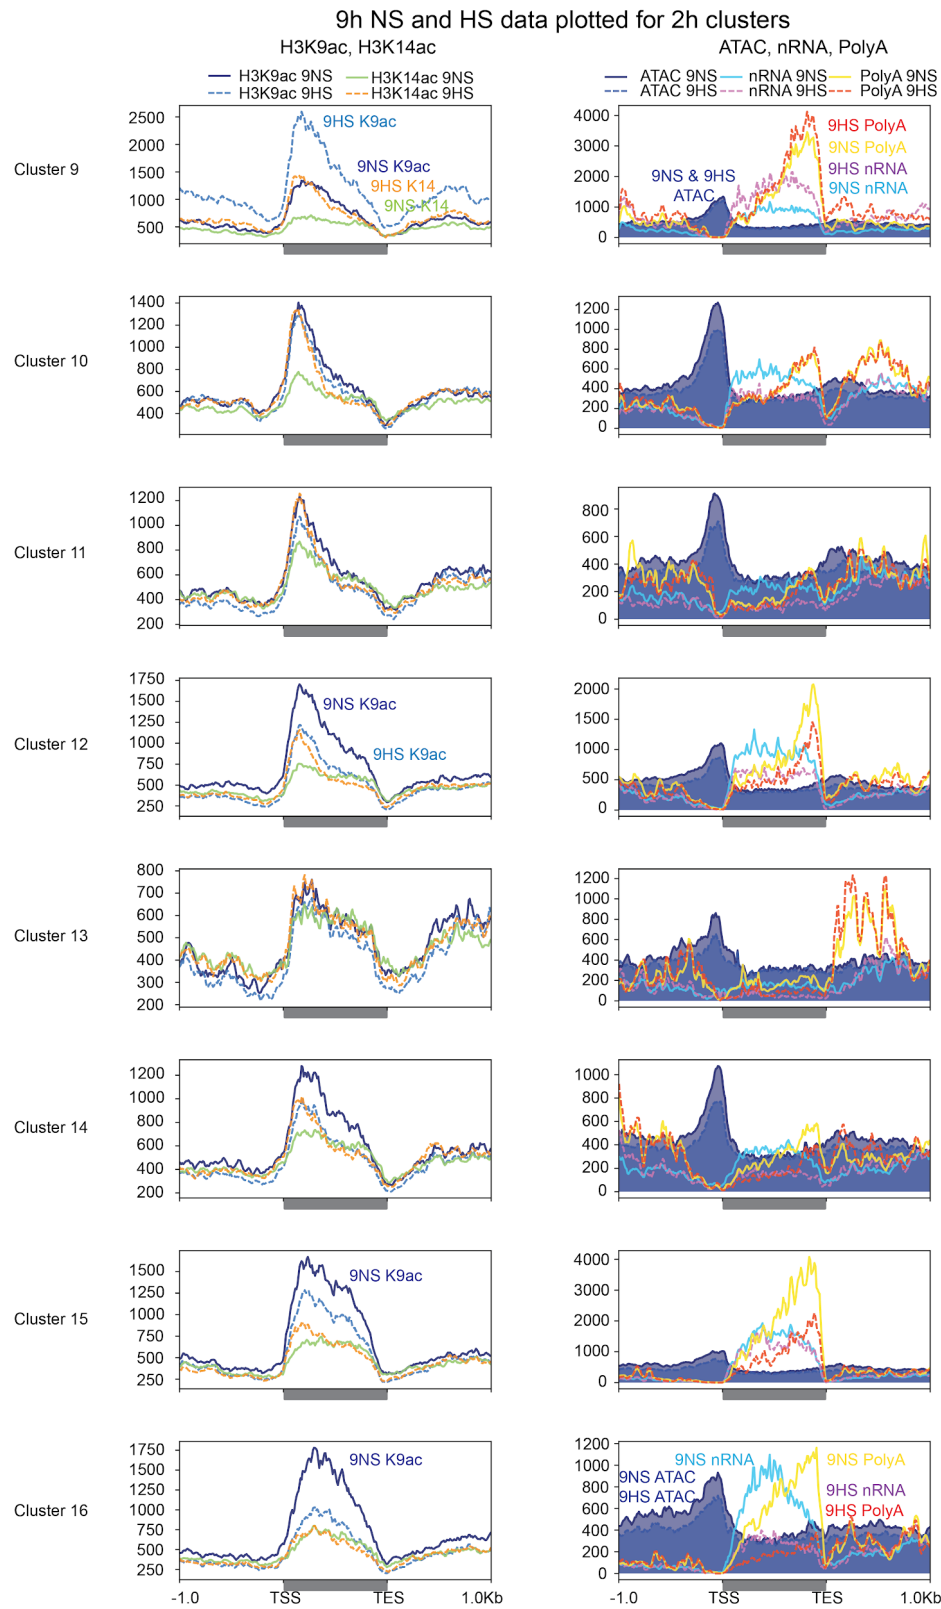

**Figure S7. Progressive regulation of variations in gene activity in response to hypoxia.** Average signal of chromatin and RNA outputs for clustered genes identified from the 9HS (9HS/9NS) comparison in Fig. 4c. Plotting is as described for Figure S6.

**Figure S8 (on two pages)**

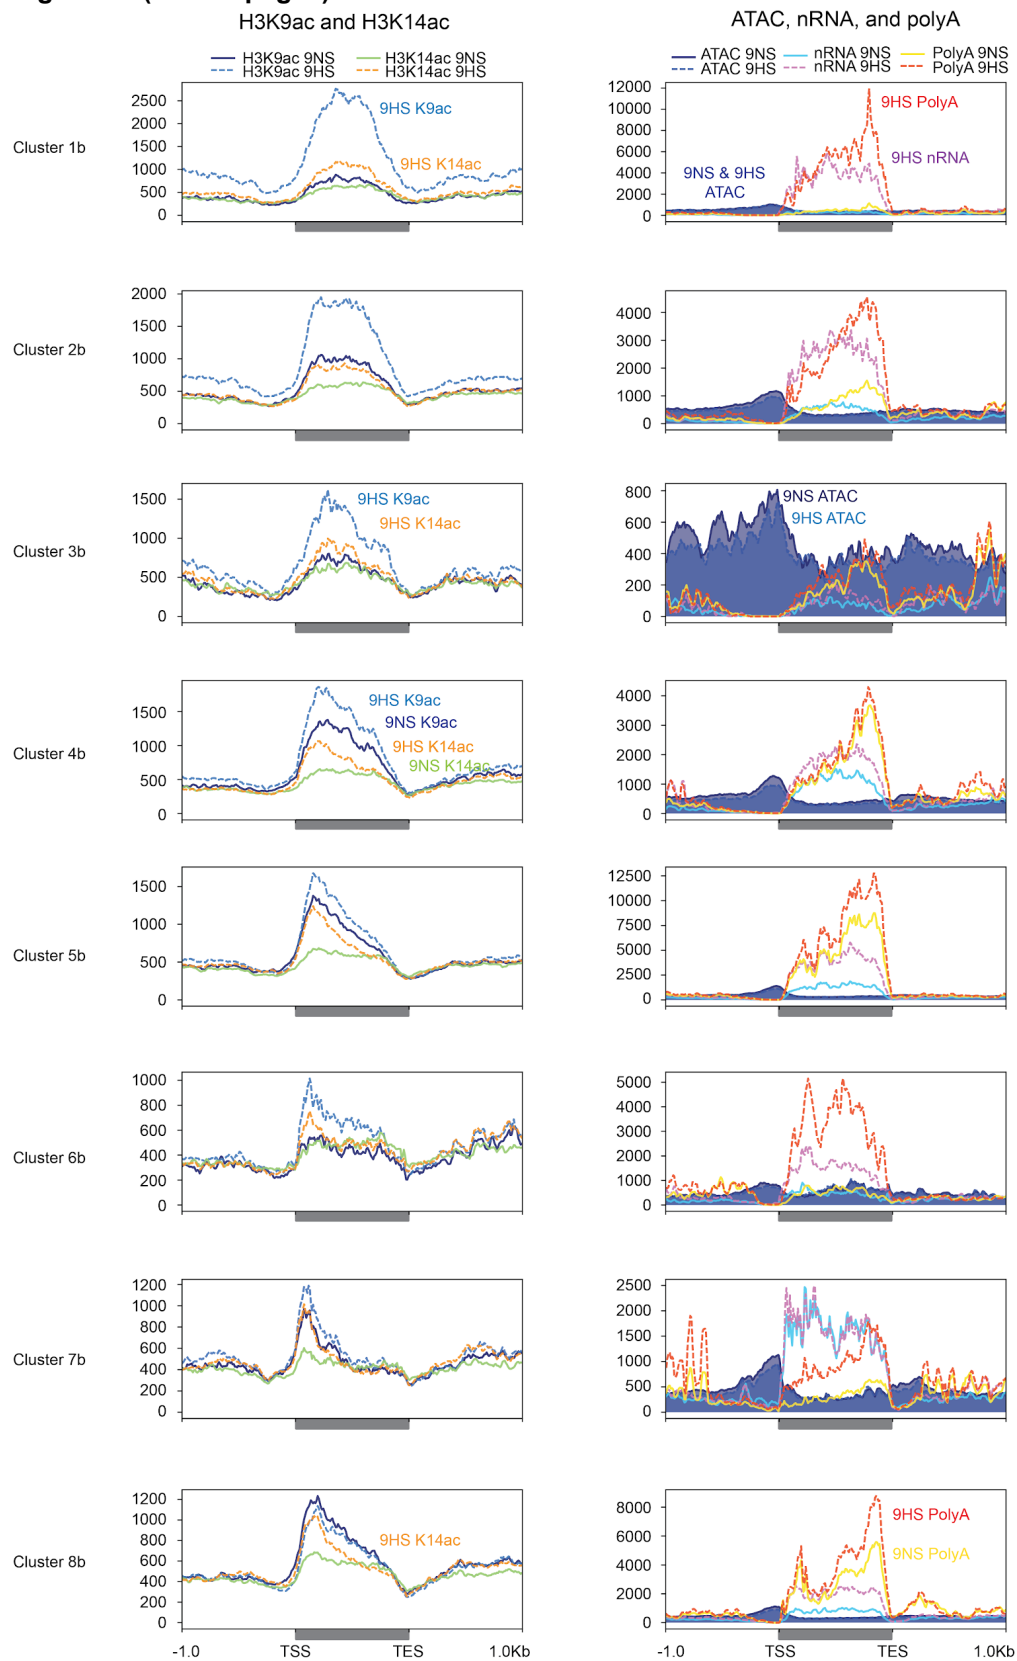

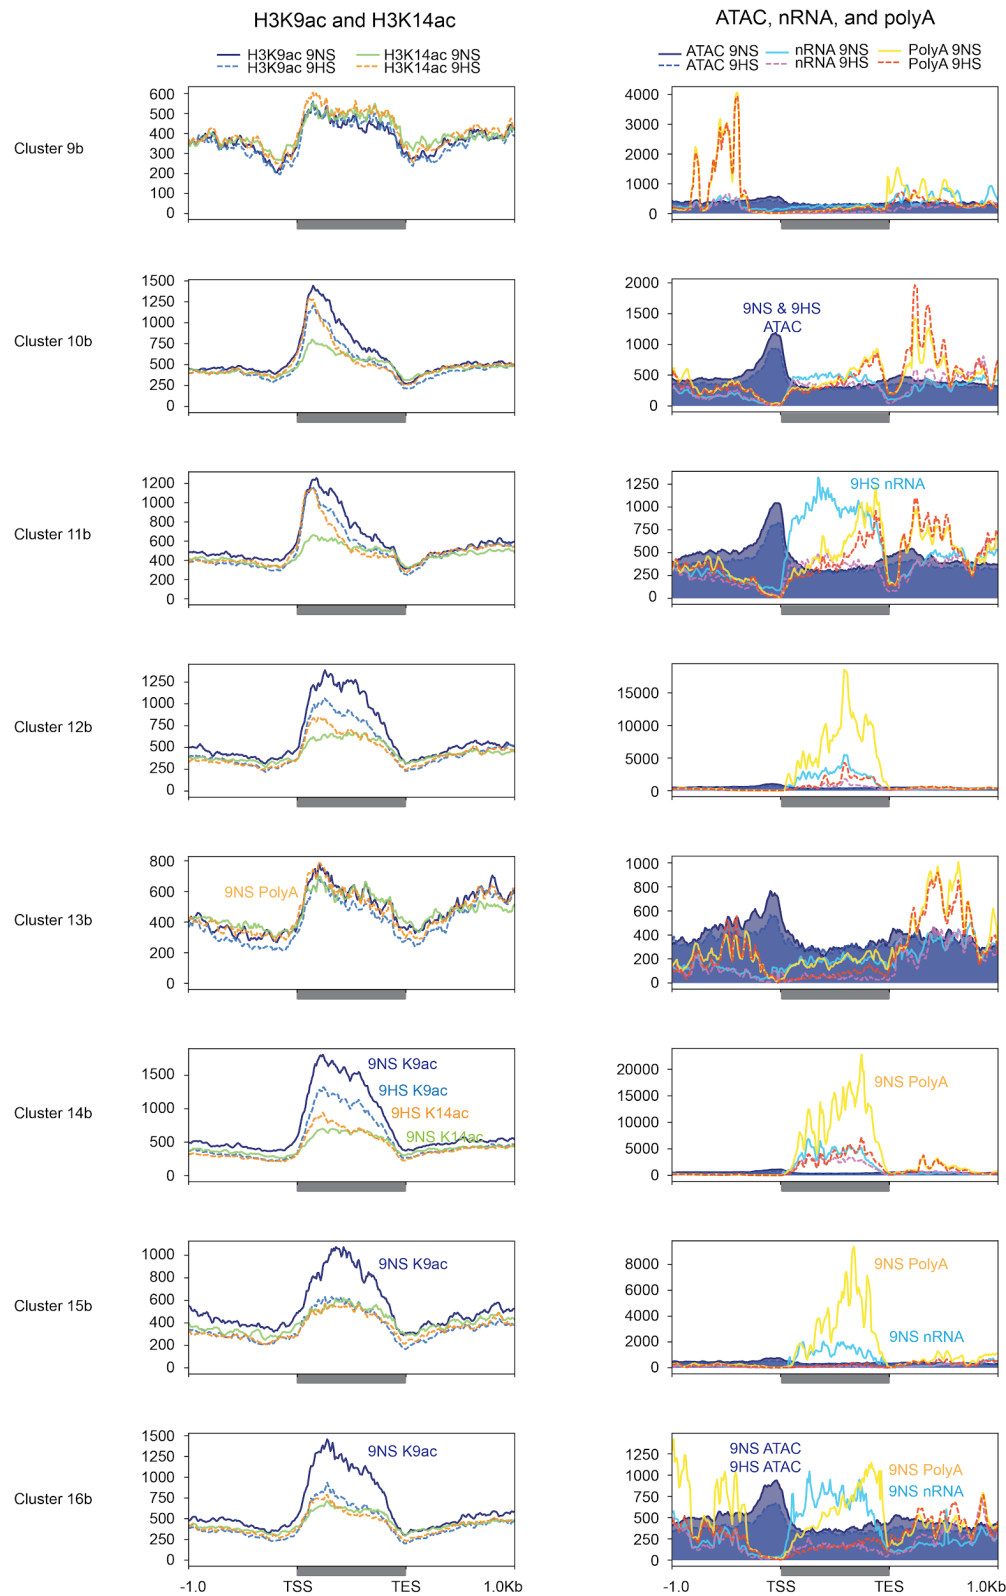

**Figure S8. Histone and gene activity comparisons of genes co-regulated after 9 h of hypoxic stress.** Average signal of chromatin and RNA data for co-regulated gene clusters identified from the 9 h hypoxic stress comparison (9HS/9NS) in Fig. 6b. Plotting is as described for Figure S6.

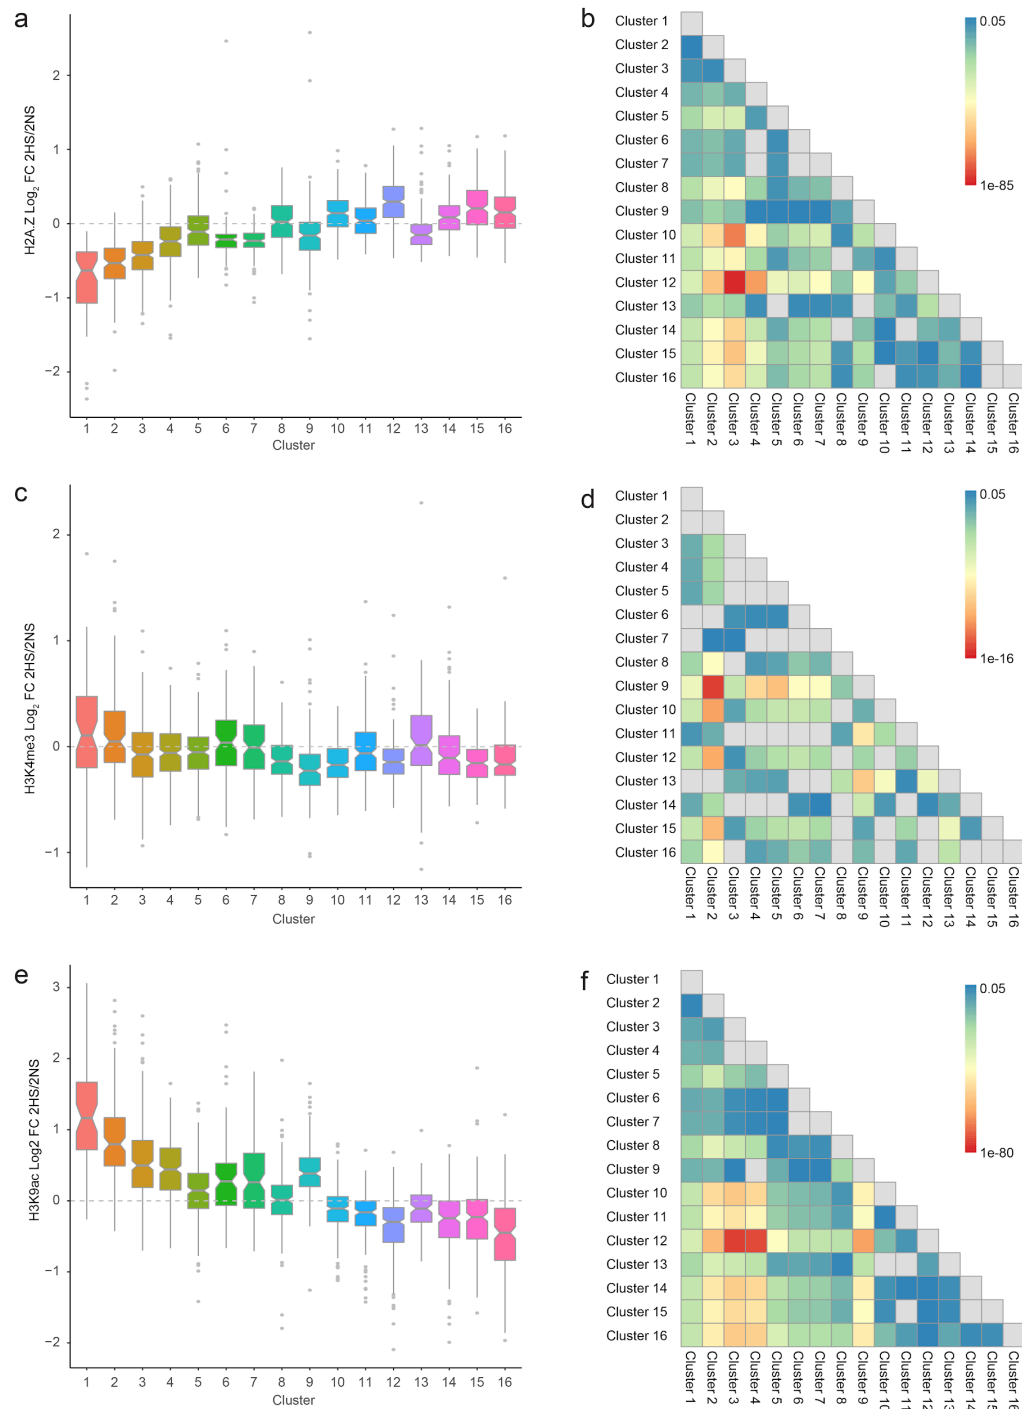

**Figure S9. Quantitative analysis of dynamics in histone modifications of co-regulated gene clusters after 2 h of hypoxic stress.** a, c, e Box plots of  $\log_2$  fold change in response to 2 h hypoxic stress of H2A.Z, H3K4me3 and H3K9ac for the 16 clusters shown in Panels b, d, f provide Wilcoxon signed rank test values of gene clusters in an all by all matrix. Grey boxes denote no significant difference between clusters. Heatmap scale depicts significance values of  $p < 0.05$ .

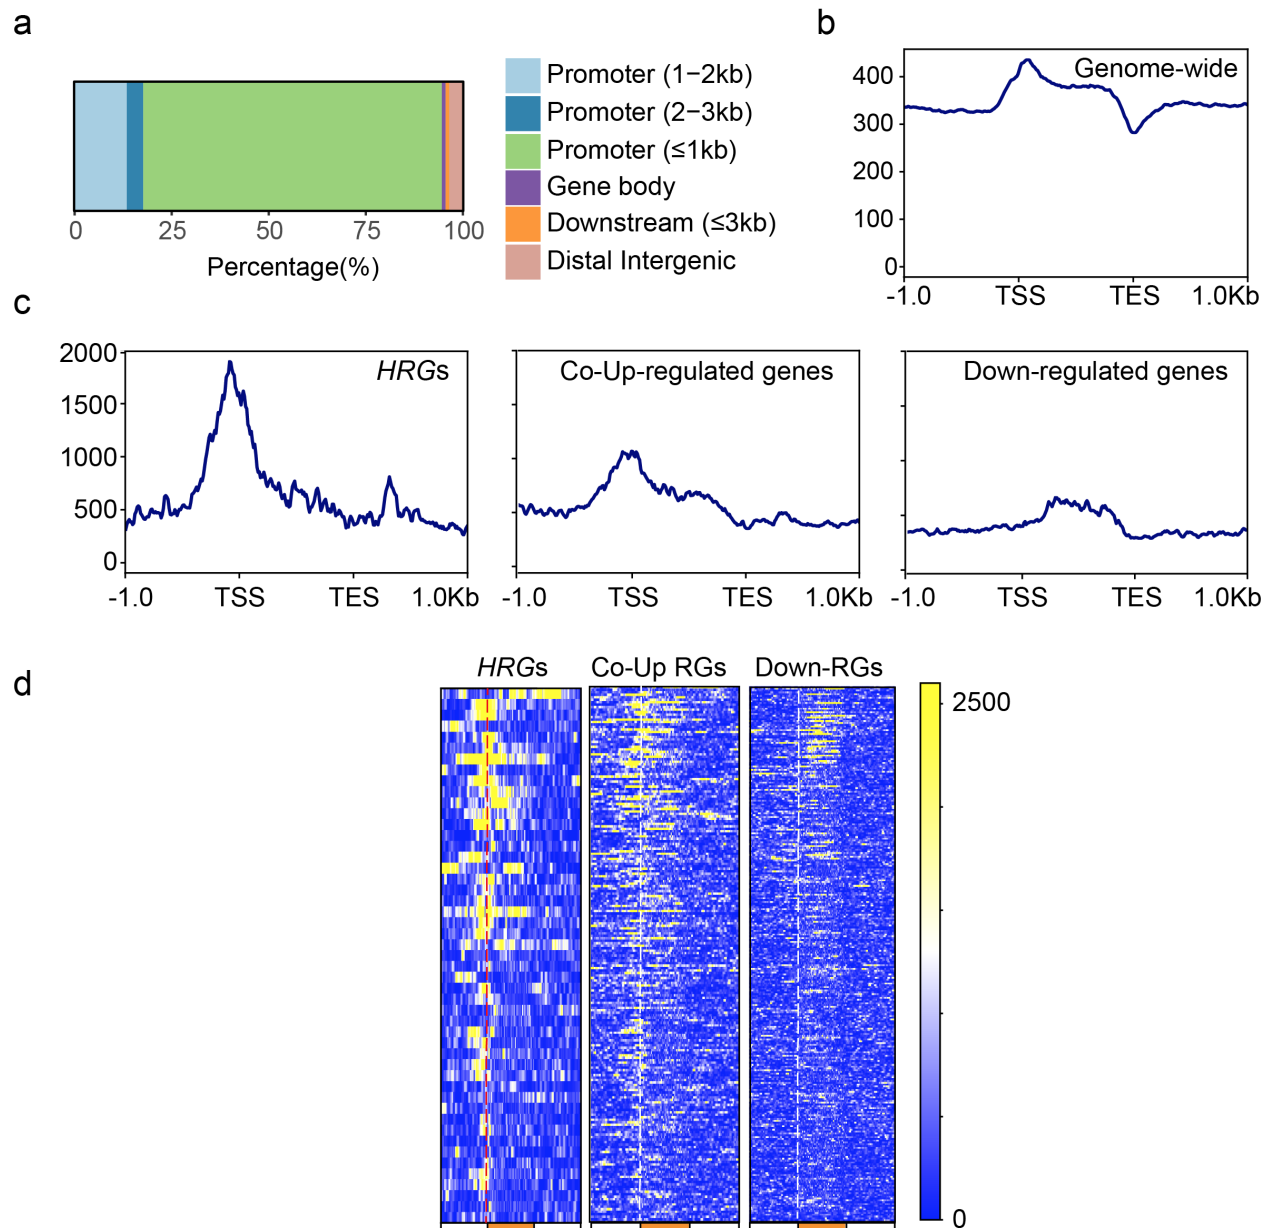

**Figure S10. Genome-wide binding dynamics of HRE2 determined by ChIP-seq.** **a** Distribution of HRE2 peaks on genomic features. **b, c** Average HRE2-ChIP read distribution in regions spanning 1 kb upstream to 1 kb downstream of gene features: **b** genome wide and **c** for the *HRGs*, Coordinately upregulated genes (Co-Up), and Down regulated genes (RGs). **d** Heat map of the HRE2- ChIP reads for genes in each group (*HRGs*) (n=49) and co-UP (n=213, and down-RGs (n=297). Each row in the heat map represents an individual gene; gene order is the same in all plots.

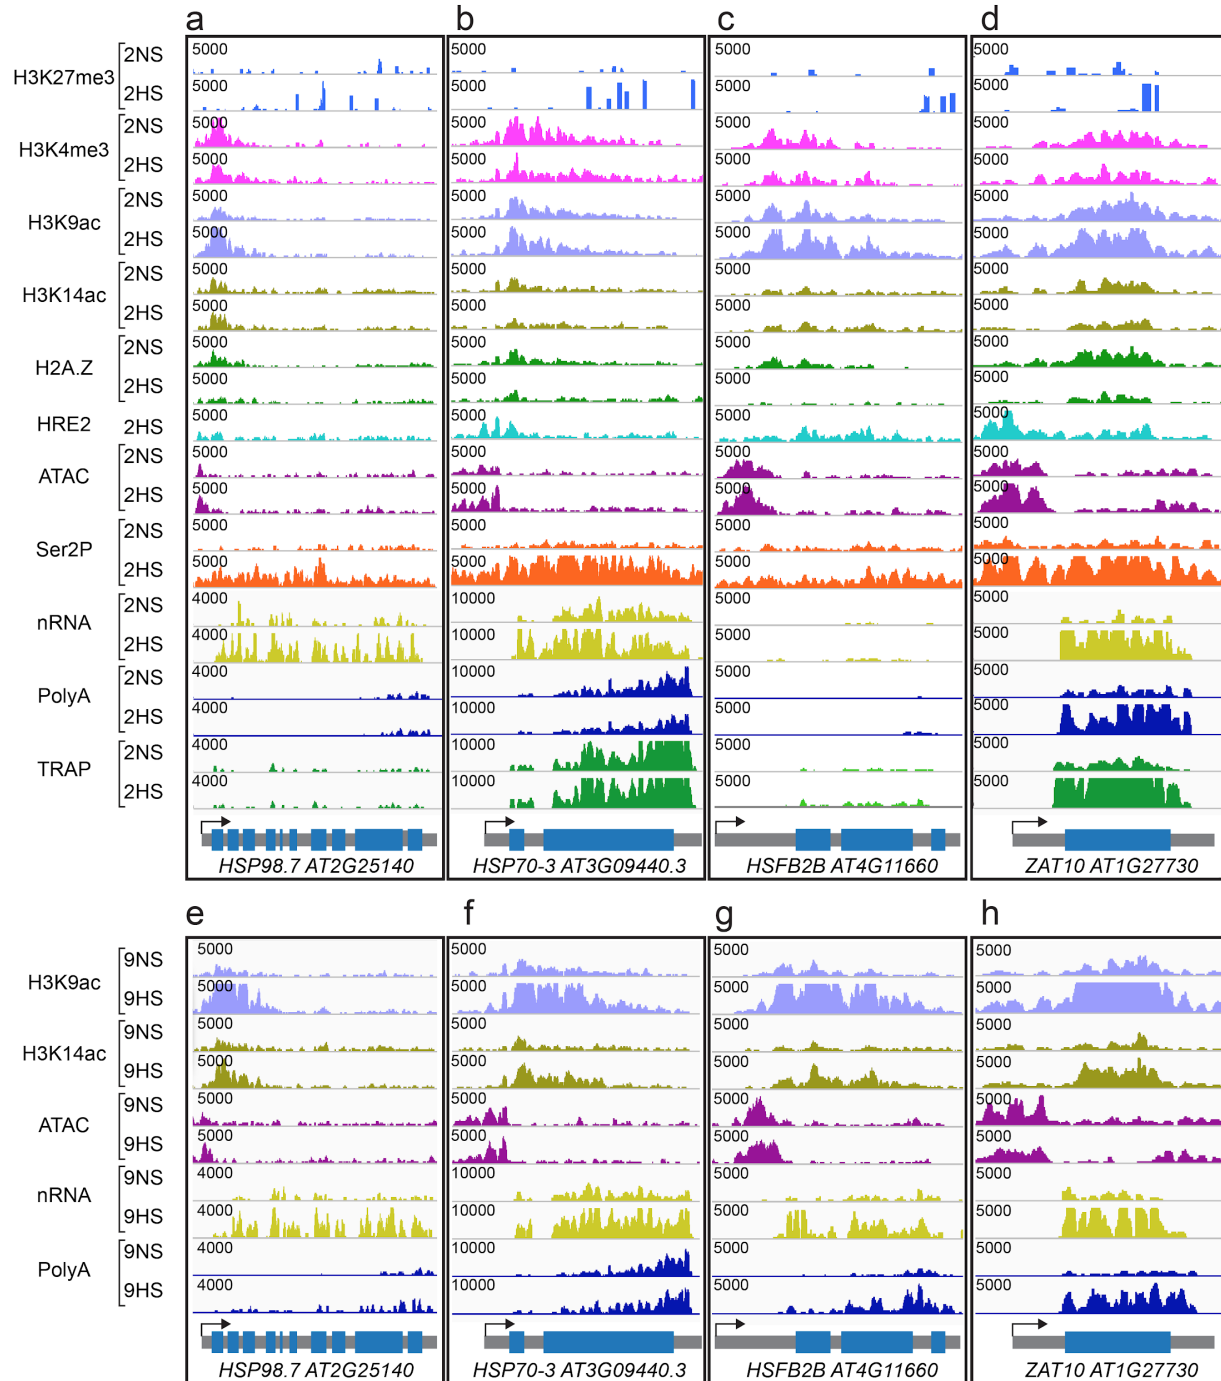

Figure S11. **Genome browser view of normalized read coverage of histone, ATAC-seq, RNAPII-Ser2P, HRE2-chromatin immunopurification and RNA outputs for representative genes of cluster 9. a-d** Normoxia (2NS) and 2 h hypoxic stress (2HS). **e-h** 9NS and 9HS samples. **a,e** HEAT SHOCK PROTEIN (HSP) 98-7 **b,f** HSP70-3, **c,g** HEAT SHOCK TRANSCRIPTION FACTOR B2B and **d,h** ZAT10. The maximum read scale value used for chromatin based and RNA based outputs is provided. At bottom, the transcription unit is shown in grey with the transcription start site marked with an arrow.
